# Supplementary material for: Main-chain stiff-stilbene photoswitches in solution, in bulk, and at surfaces
Source: Royal Society of Chemistry journal article supplement (doi:10.1039/d4sc06470d), 2024-01-01
Supplement: d4sc06470d1.pdf [file d4sc06470d1.pdf]

## Electronic Supplementary Information

### **Main-chain stiff-stilbene photoswitches in solution, in bulk, and at surfaces**

Naoki Kaneda, Keiichi Imato,\* Ayane Sasaki, Ryo Tanaka, Ichiro Imae, Toyoaki Hirata, Takuya Matsumoto and Yousuke Ooyama\*

*Applied Chemistry Program, Graduate School of Advanced Science and Engineering, Hiroshima University, 1-4-1 Kagamiyama, Higashihiroshima, 739-8527, Japan.*

*E-mail: kimato@hiroshima-u.ac.jp, yooyama@hiroshima-u.ac.jp*

## Table of contents

|                                                                                |     |
|--------------------------------------------------------------------------------|-----|
| Materials and measurements.....                                                | S3  |
| Synthesis of <i>E-P1</i> .....                                                 | S5  |
| Synthesis of <i>Z-P1</i> .....                                                 | S7  |
| Synthesis of <i>E-P2</i> .....                                                 | S9  |
| Synthesis of <i>E-P3</i> .....                                                 | S11 |
| Side reactions in polycondensation without triethylamine for <i>E-P2</i> ..... | S15 |
| Photoisomerization in solution.....                                            | S16 |
| DOSY NMR measurements.....                                                     | S20 |
| Macromolecular conformational changes in solution.....                         | S24 |
| Hydrogen bonding in <i>P1</i> .....                                            | S27 |
| Thermal properties in bulk.....                                                | S34 |
| Photoisomerization in the glassy state.....                                    | S50 |
| Wettability of thin film surfaces.....                                         | S58 |
| References.....                                                                | S63 |

## Materials

All solvents and reagents were purchased from FUJIFILM Wako Pure Chemical, Tokyo Chemical Industry, Sigma Aldrich, or Nacalai Tesque and used as received unless otherwise noted. Milli-Q water (resistivity >18 M $\Omega$  cm) was prepared using a Merck Direct-Q UV 3 water purification system. Hexamethylene diisocyanate (HDI) and adipoyl chloride were purified by distillation. The *E* and *Z* isomers of a sterically hindered stiff stilbene (HSS) derivative with two hydroxy groups, ***E*-M1** and ***Z*-M1**, were synthesized and isolated as monomers according to our previously published methods.<sup>1</sup> The *E* isomer of an HSS derivative with two hydroxy groups at the C6 and C6' positions, ***E*-HSS-diol**, was also obtained according to our previously published methods.<sup>1</sup>

## Measurements

<sup>1</sup>H NMR and <sup>13</sup>C NMR spectra were recorded at 25 °C using Varian-400 (400 MHz) and Varian-500 (500 MHz) FT NMR spectrometers in CDCl<sub>3</sub>, CD<sub>2</sub>Cl<sub>2</sub>, acetone-*d*<sub>6</sub>, tetrahydrofuran (THF)-*d*<sub>8</sub>, or toluene-*d*<sub>8</sub>. Diffusion-ordered spectroscopy (DOSY) NMR spectra were recorded at 27 °C on Varian-500 (500 MHz) FT NMR spectrometer in CD<sub>2</sub>Cl<sub>2</sub> using the bipolar pulse pair-stimulated echo (BPPStE) sequence with a diffusion delay ( $\Delta$ ) of 50 ms, length of the gradient pulse ( $\delta$ ) of 2 ms, and gradient field strengths in the range of 0.02–0.6 T/m with exponential ramp steps. Number of scans for each gradient field strength was 16. To prevent the convection problem, the measurements were performed using a 3 mm tube, and polymers were dissolved in CD<sub>2</sub>Cl<sub>2</sub> and stirred at RT in the dark at least overnight, prior to DOSY NMR measurements. DOSY spectra were processed in the MestReNova 11.0.4 software using Bayesian DOSY Transform with a resolution factor of 0.5, two repetitions, and 64 points in the diffusion dimension over the range from  $1 \times 10^{-11}$  to  $1 \times 10^{-7}$  m<sup>2</sup> s<sup>-1</sup>. High-resolution mass spectral (HRMS) data were acquired using a Thermo Fisher Scientific LTQ Orbitrap XL. Photoabsorption spectra were obtained at room temperature (RT) using a Shimadzu UV-3600i Plus spectrophotometer. Size exclusion chromatography (SEC) measurements were performed at 40 °C using a Shimadzu Prominence-i LC-2030 plus with a guard column (LF-G, Shodex), two series-connected columns (LF-804, Shodex), a UV detector, and a differential refractive index (RI) detector (RID-20A). THF was used as the eluent, and

polystyrene standards were used to calibrate the SEC system. Polymers were dissolved in THF and stirred at RT in the dark at least overnight, prior to SEC measurements. Fourier-transform infrared (FTIR) spectra were recorded at RT using a Shimadzu IRTracer-100 with a Quest single-reflection ATR accessory. Transmittance measurements were conducted at RT or a heating rate of 5 °C min<sup>-1</sup> under nitrogen atmosphere using a Shimadzu UV-3600i Plus spectrophotometer. Thermogravimetric analyses (TGA) were conducted at a heating rate of 10 °C min<sup>-1</sup> under nitrogen atmosphere using a Rigaku Thermo plus EV02 TG-DTA8122. Differential scanning calorimetry (DSC) measurements were performed at a heating rate of 10 °C min<sup>-1</sup> under nitrogen atmosphere using a Hitachi DSC7000X. X-ray diffraction (XRD) patterns were obtained at RT using a Rigaku MiniFlex600-C/CM diffractometer with a Cu K $\alpha$  radiator. Thickness of thin films was measured using a Keyence VK-9700 3D laser microscope. Static and dynamic contact angles were measured at RT by the sessile drop and extension/contraction methods using a Kyowa Interface Science DMO-602 contact angle meter. Surface roughness values were obtained by atomic force microscopy (AFM) measurements in dynamic mode using a Shimadzu SPM-9700HT.

## Synthesis of *E*-P1

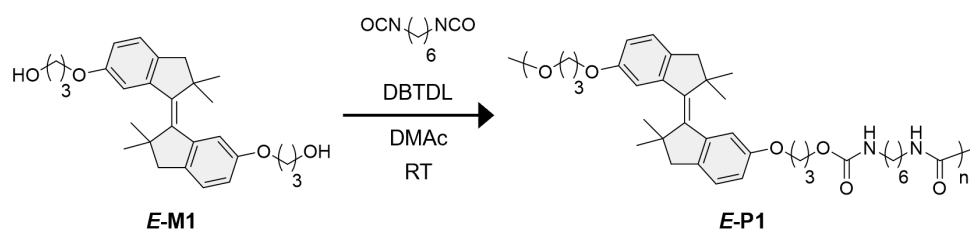

**Scheme S1** Synthetic route for *E*-P1.

***E*-P1.** A solution of *E*-M1 (501 mg, 1.15 mmol) and di-*n*-dibutyltin dilaurate (DBTDL, 3.40  $\mu$ L, 5.65  $\mu$ mol) in dehydrated dimethylacetamide (DMAc, 3.1 mL) was prepared under nitrogen atmosphere. HDI (183  $\mu$ L, 1.14 mmol) was then added dropwise to the solution under nitrogen atmosphere. After stirring at RT for 30 h, methanol (0.5 mL) was added to the reaction mixture and stirred for 3 h. The mixture was precipitated into water, and the precipitate was collected by filtration, dissolved in dichloromethane (DCM, 3 mL), and reprecipitated into a mixed solvent of hexane (36 mL) and isopropanol (4 mL). The precipitate was collected by filtration and dried under vacuum to give *E*-P1 as a white solid (501 mg, 72% yield). <sup>1</sup>H NMR (500 MHz, CDCl<sub>3</sub>, Fig. S1):  $\delta$  (ppm) = 7.08–7.02 (m, 4H, aromatic), 6.76–6.69 (m, 2H, aromatic), 4.70 (s, 2H, NH), 4.25 (t,  $J$  = 5.9 Hz, 4H, OCH<sub>2</sub>), 4.03 (t,  $J$  = 6.0 Hz, 4H, OCH<sub>2</sub>), 3.17–3.08 (m, 4H, NHCH<sub>2</sub>), 2.70 (s, 4H, CH<sub>2</sub>), 2.15–2.02 (m, 4H, CH<sub>2</sub>), 1.51–1.40 (m, 4H, CH<sub>2</sub>), 1.35–1.25 (m, 16H, CH<sub>2</sub> and CH<sub>3</sub>). The number average molecular weights ( $M_n$ s) and polydispersity indices ( $M_w/M_n$ s) were determined by SEC (Fig. S2). n1:  $M_n$  = 12900 g mol<sup>-1</sup>,  $M_w/M_n$  = 1.51. n2:  $M_n$  = 13200 g mol<sup>-1</sup>,  $M_w/M_n$  = 1.61.

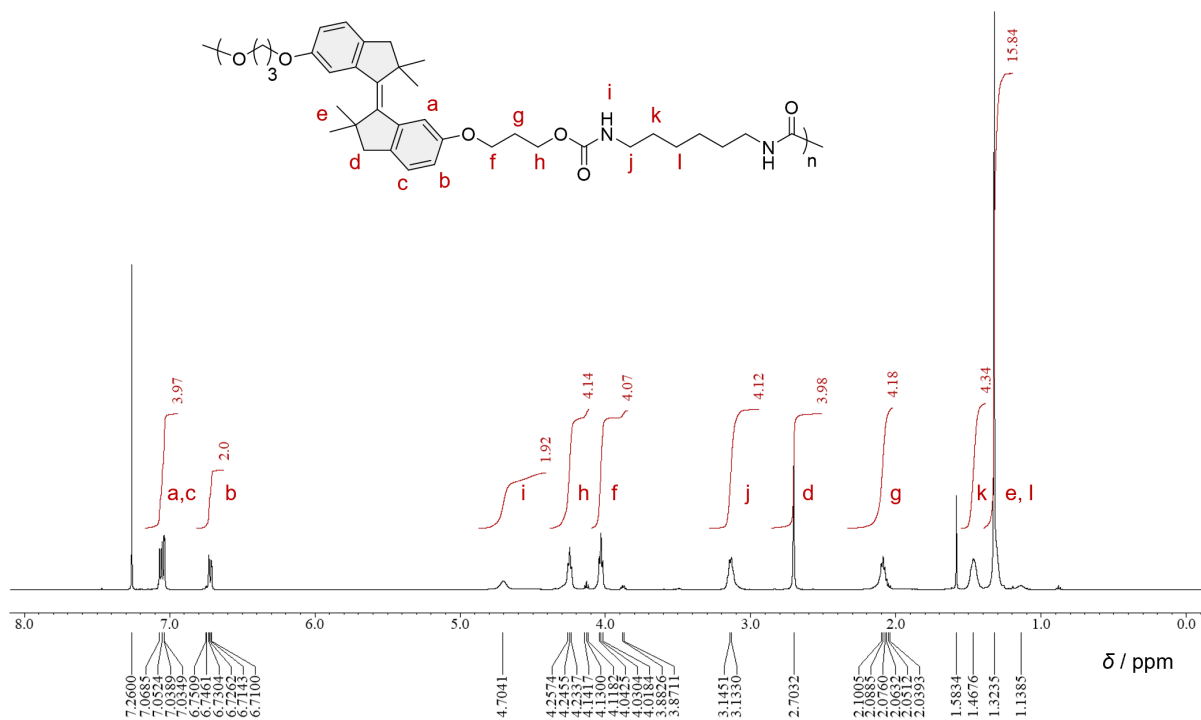

**Fig. S1** <sup>1</sup>H NMR spectrum (500 MHz, CDCl<sub>3</sub>) of *E*-P1.

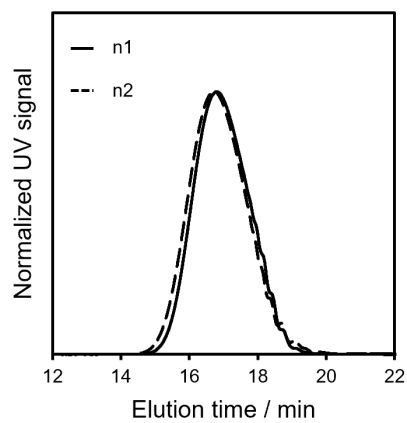

**Fig. S2** SEC curves of *E*-P1.

## Synthesis of Z-P1

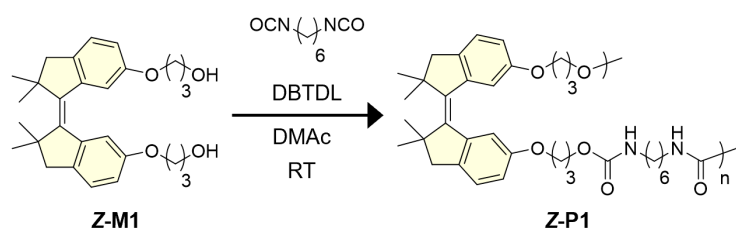

**Scheme S2** Synthetic route for **Z-P1**.

**Z-P1.** A solution of **Z-M1** (501 mg, 1.15 mmol) and DBTDL (3.40  $\mu$ L, 5.65  $\mu$ mol) in dehydrated DMAc (3.1 mL) was prepared under nitrogen atmosphere. HDI (183  $\mu$ L, 1.14 mmol) was then added dropwise to the solution under nitrogen atmosphere. After stirring at RT for 30 h, methanol (0.5 mL) was added to the reaction mixture and stirred for 3 h. The mixture was precipitated into water, and the precipitate was collected by filtration, dissolved in DCM (3 mL), and reprecipitated into a mixed solvent of hexane (36 mL) and isopropanol (4 mL). The precipitate was collected by filtration and dried under vacuum to give **Z-P1** as a pale yellow solid (482 mg, 70% yield). <sup>1</sup>H NMR (500 MHz, CDCl<sub>3</sub>, Fig. S3):  $\delta$  (ppm) = 7.14–7.08 (m, 2H, aromatic), 7.06–7.00 (m, 2H, aromatic), 6.65–6.58 (m, 2H, aromatic), 5.20–5.00 (m, 2H, NH), 4.15–4.05 (m, 4H, OCH<sub>2</sub>), 3.85–3.67 (m, 4H, OCH<sub>2</sub>), 3.18–3.01 (m, 6H, NHCH<sub>2</sub> and CH<sub>2</sub>), 2.46 (d,  $J$  = 14.3 Hz, 2H, CH<sub>2</sub>), 1.97–1.85 (m, 4H, CH<sub>2</sub>), 1.61 (s, 6H, CH<sub>3</sub>), 1.53–1.40 (m, 4H, CH<sub>2</sub>), 1.36–1.23 (m, 4H, CH<sub>2</sub>), 1.19 (s, 6H, CH<sub>3</sub>). The  $M_n$  and  $M_w/M_n$  were determined by SEC (Fig. S4).  $M_n$  = 9900 g mol<sup>-1</sup>,  $M_w/M_n$  = 1.59.

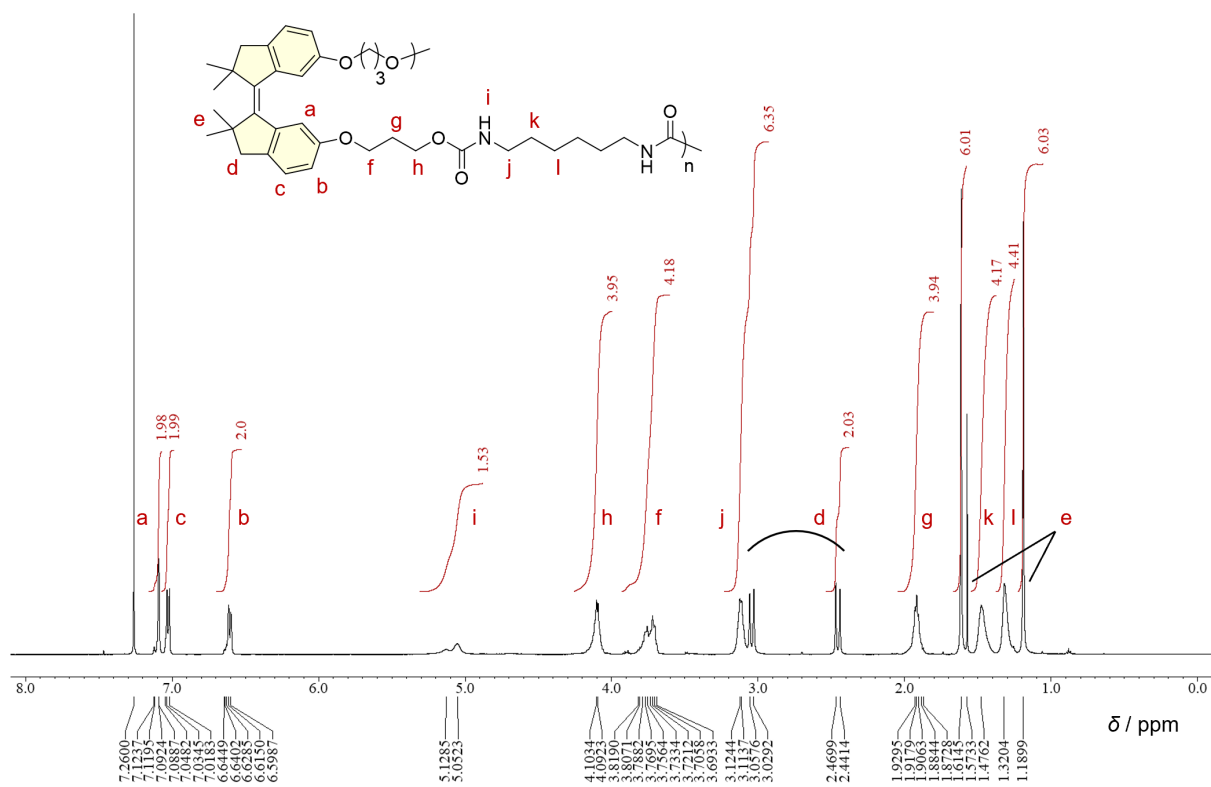

**Fig. S3** <sup>1</sup>H NMR spectrum (500 MHz, CDCl<sub>3</sub>) of **Z-P1**.

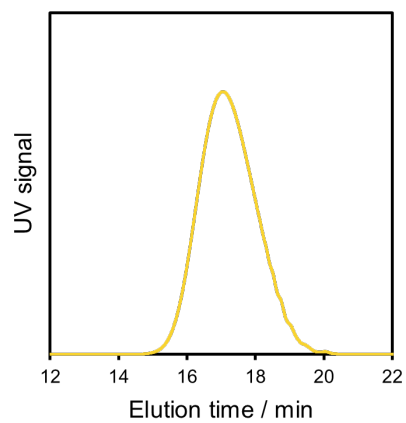

**Fig. S4** SEC curve of **Z-P1**.



## Synthesis of *E-P2*

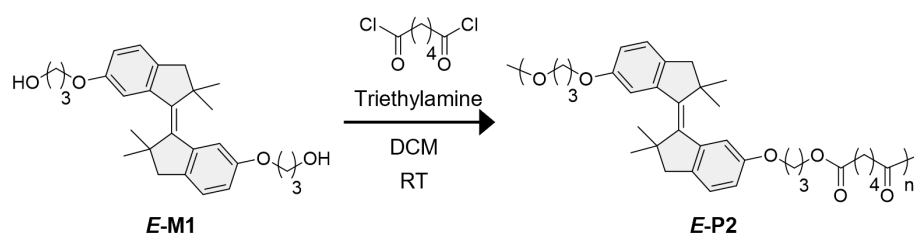

**Scheme S3** Synthetic route for *E-P2*.

***E-P2***. A solution of *E-M1* (400 mg, 0.92 mmol) and triethylamine (190  $\mu$ L, 1.37 mmol) in dehydrated DCM (1.6 mL) was prepared under nitrogen atmosphere. Adipoyl chloride (130  $\mu$ L, 0.89 mmol) was then added dropwise to the solution in an ice bath under nitrogen atmosphere. After stirring at RT for 43 h, adipoyl chloride (8 drops) was added to the reaction mixture to promote polymerization. After stirring at RT for 8 h, methanol (0.3 mL) was added to the reaction mixture and stirred for 3 h. The mixture was diluted with DCM (30 mL), washed with saturated  $\text{NaHCO}_3$  aqueous solution and water, and concentrated. The crude product was precipitated into a mixed solvent of hexane (30 mL) and methanol (4.5 mL). The precipitate was collected by dissolution in DCM, concentrated, and dried under vacuum to give *E-P2* as a white solid (320 mg, 66% yield).  $^1\text{H NMR}$  (500 MHz,  $\text{CDCl}_3$ , Fig. S5):  $\delta$  (ppm) = 7.12–7.02 (m, 4H, aromatic), 6.77–6.70 (m, 2H, aromatic), 4.27 (t,  $J = 6.4$  Hz, 4H,  $\text{OCH}_2$ ), 4.03 (t,  $J = 6.1$  Hz, 4H,  $\text{OCH}_2$ ), 2.71 (s, 4H,  $\text{CH}_2$ ), 2.38–2.25 (m, 4H,  $\text{COCH}_2$ ), 2.18–2.06 (m, 4H,  $\text{CH}_2$ ), 1.71–1.60 (m, 4H,  $\text{CH}_2$ ), 1.33 (s, 12H,  $\text{CH}_3$ ). The  $M_n$  and  $M_w/M_n$  were determined by SEC (Fig. S6).  $M_n = 8000 \text{ g mol}^{-1}$ ,  $M_w/M_n = 1.44$ .

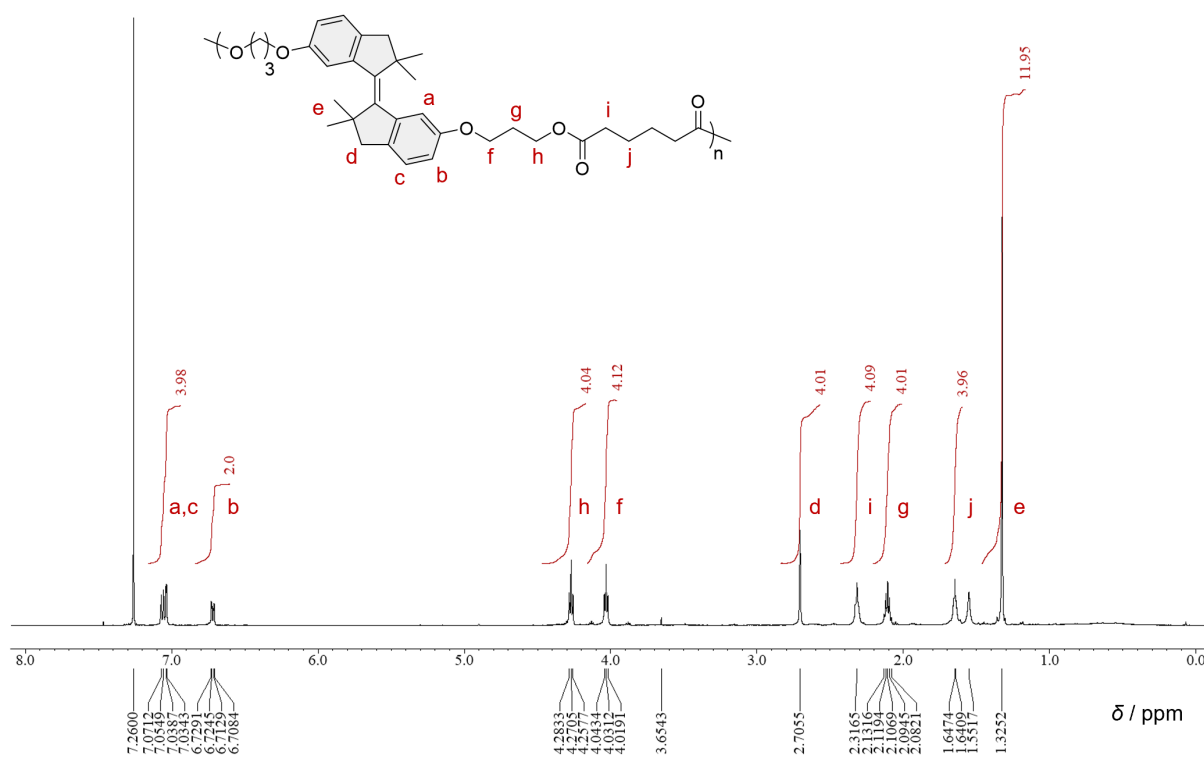

**Fig. S5** <sup>1</sup>H NMR spectrum (500 MHz, CDCl<sub>3</sub>) of *E*-P2.

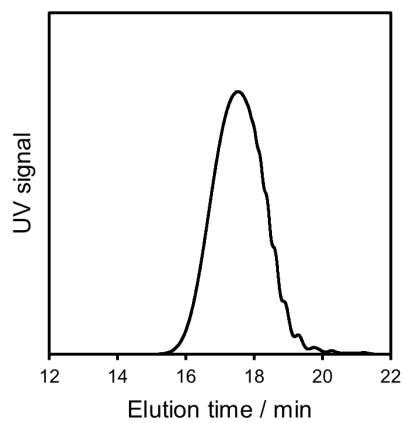

**Fig. S6** SEC curve of *E*-P2.

## Synthesis of *E*-P3

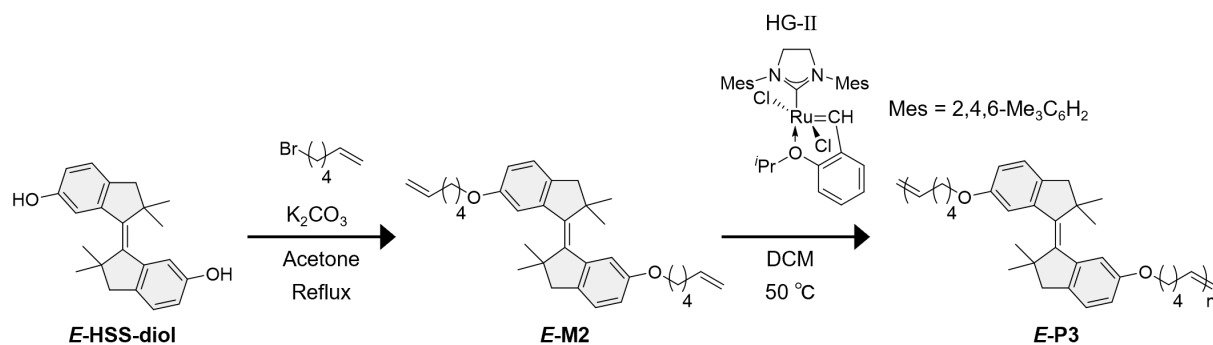

**Scheme S4** Synthetic route for *E*-P3.

***E*-M2.** A solution of *E*-HSS-diol (1.00 g, 3.12 mmol) and potassium carbonate ( $K_2CO_3$ , 1.73 g, 12.5 mmol) in dehydrated acetone (20 mL) was prepared under nitrogen atmosphere. 6-Bromo-1-hexene (1.70 mL, 12.7 mmol) was added to the solution under nitrogen atmosphere. The mixture was stirred under reflux for 49 h. After cooling to RT, ethyl acetate was added, and the solution was washed with water and brine, dried over anhydrous  $MgSO_4$ , filtered, and concentrated. Finally, the crude product was purified by flash column chromatography (silica, hexane/ethyl acetate = 9/1) and dried under vacuum to give *E*-M2 as a pale yellow liquid (1.05 g, 69% yield).  $^1H$  NMR (500 MHz, acetone- $d_6$ , Fig. S7):  $\delta$  (ppm) = 7.11 (d,  $J$  = 8.2 Hz, 2H, aromatic), 7.06 (d,  $J$  = 2.4 Hz, 2H, aromatic), 6.78 (dd,  $J$  = 8.2 and 2.4 Hz, 2H, aromatic), 5.89–5.80 (m, 2H, CH), 5.06–4.92 (m, 4H,  $CH_2$ ), 4.02 (t,  $J$  = 6.5, 4H,  $OCH_2$ ), 2.72 (s, 4H,  $CH_2$ ), 2.17–2.11 (m, 4H,  $CH_2$ ), 1.83–1.77 (m, 4H,  $CH_2$ ), 1.62–1.55 (m, 4H,  $CH_2$ ), 1.34 (s, 12H,  $CH_3$ ).  $^{13}C$  NMR (125 MHz, acetone- $d_6$ , Fig. S8):  $\delta$  (ppm) = 158.1, 147.3, 144.8, 139.7, 138.2, 125.7, 115.2, 115.1, 114.7, 68.7, 52.1, 51.9, 34.3, 29.8, 28.2, 26.3. HRMS (APCI)  $m/z$ :  $[M+H]^+$  Calcd for  $C_{34}H_{45}O_2$  485.34196; Found 485.34131.

***E*-P3.** A solution of *E*-M2 (400 mg, 0.83 mmol) and a 2nd generation Hoveyda-Grubbs catalyst (HG-II, 7.79 mg, 12.0  $\mu$ mol) in dehydrated DCM (0.44 mL) was prepared under nitrogen atmosphere. The mixture was stirred at 50 °C, then generated ethylene gas was removed under vacuum in a liquid nitrogen bath for 1 min, and the mixture was stirred at 50 °C again.<sup>2</sup> The procedure was repeated three times in the first 1.5 h and seven times in the following 7.5 h. After cooling to RT, ethyl vinyl ether (0.1 mL) was added to the reaction mixture and stirred for 1 h. The mixture was diluted with DCM and

stirred with SiliaMetS DMT (metal scavenger, 20 equivalent to HG-II) to remove HG-II for 5 days. The mixture was filtered, and the filtrate was concentrated and precipitated into cold hexane. The precipitate was collected by filtration and dried under vacuum to give **E-P3** as a white solid (198 mg, 50% yield).  $^1\text{H}$  NMR (500 MHz,  $\text{CDCl}_3$ , Fig. S9):  $\delta$  (ppm) = 7.10–7.02 (m, 4H, aromatic), 6.75–6.69 (m, 2H, aromatic), 5.62–5.37 (m, 2H, CH), 4.00–3.90 (m, 4H,  $\text{OCH}_2$ ), 2.70 (s, 4H,  $\text{CH}_2$ ), 2.60–1.20 (m, 24H,  $\text{CH}_2$  and  $\text{CH}_3$ ). The  $M_n$  and  $M_w/M_n$  were determined by SEC (Fig. S10).  $M_n = 11900 \text{ g mol}^{-1}$ ,  $M_w/M_n = 1.36$ .

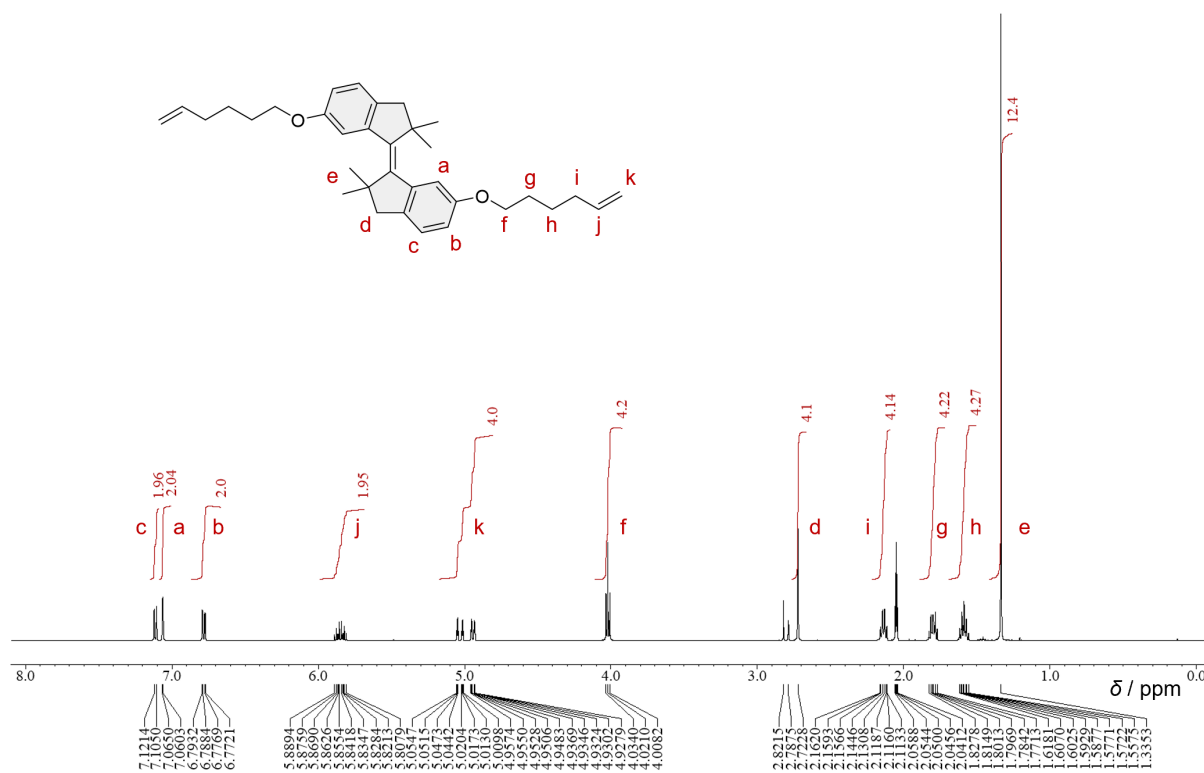

Fig. S7  $^1\text{H}$  NMR spectrum (500 MHz, acetone- $d_6$ ) of **E-M2**.

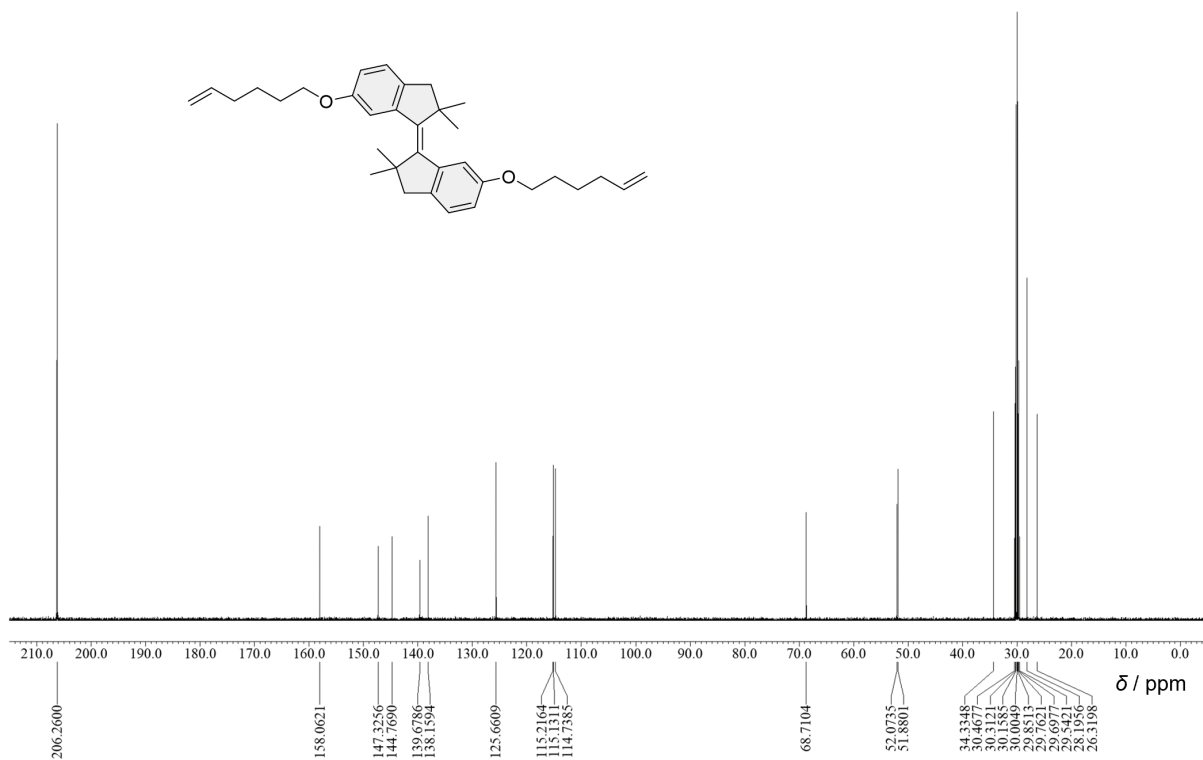

Fig. S8  $^{13}\text{C}$  NMR spectrum (125 MHz, acetone- $d_6$ ) of *E*-M2.

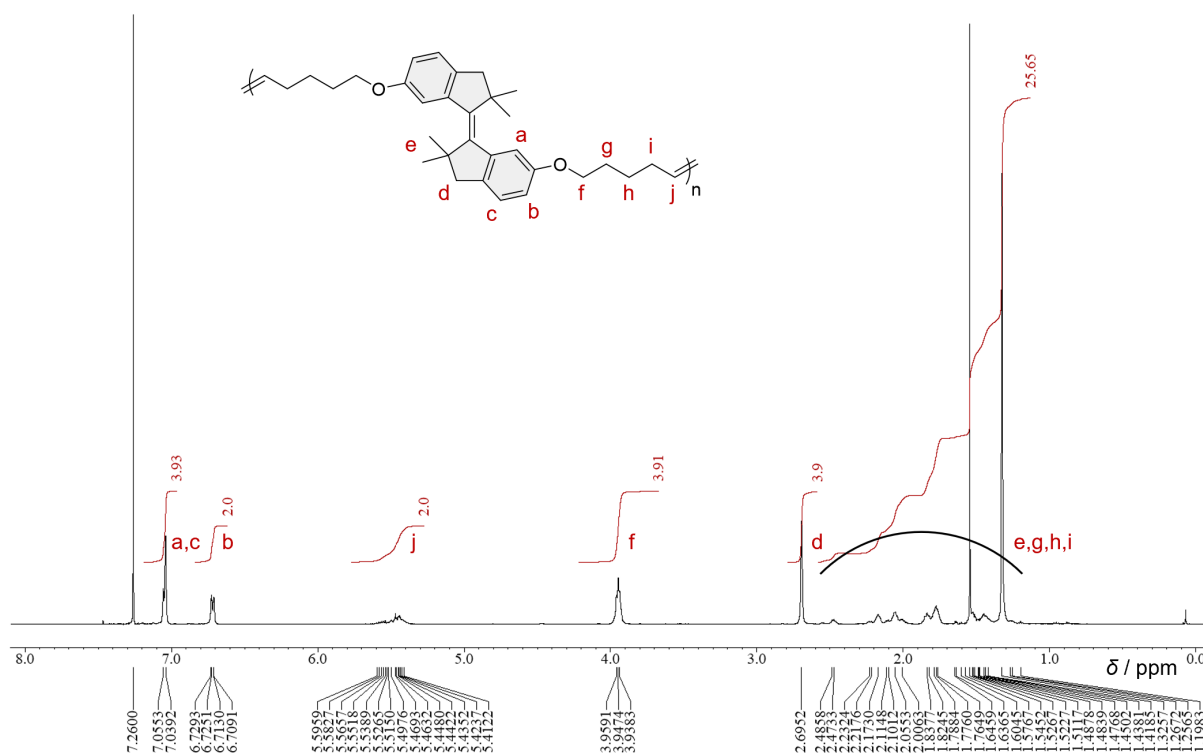

Fig. S9  $^1\text{H}$  NMR spectrum (500 MHz,  $\text{CDCl}_3$ ) of *E*-P3.

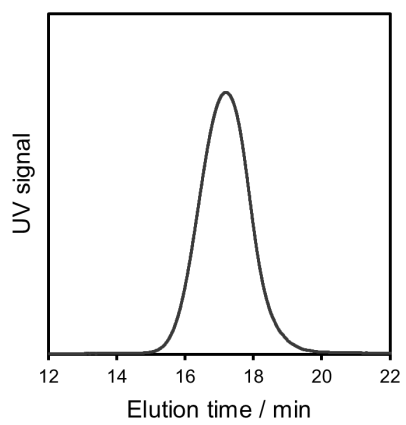

**Fig. S10** SEC curve of *E-P3*.

## Side reactions in polycondensation without triethylamine for *E*-P2

A solution of *E*-M1 (412 mg, 0.94 mmol) in dehydrated DCM (1.6 mL) was prepared under nitrogen atmosphere. Adipoyl chloride (134  $\mu$ L, 0.92 mmol) was then added dropwise to the solution in an ice bath under nitrogen atmosphere. After stirring at RT for 3 days, methanol (0.3 mL) was added to the reaction mixture and stirred for 3 h. The mixture was diluted with DCM (30 mL), washed with saturated NaHCO<sub>3</sub> aqueous solution and water, and concentrated. The crude product was precipitated into a mixed solvent of hexane (30 mL) and methanol (4.5 mL). The precipitate was collected by dissolution in DCM, concentrated, and dried under vacuum. A <sup>1</sup>H NMR spectrum of the reaction product was measured (Fig. S11).

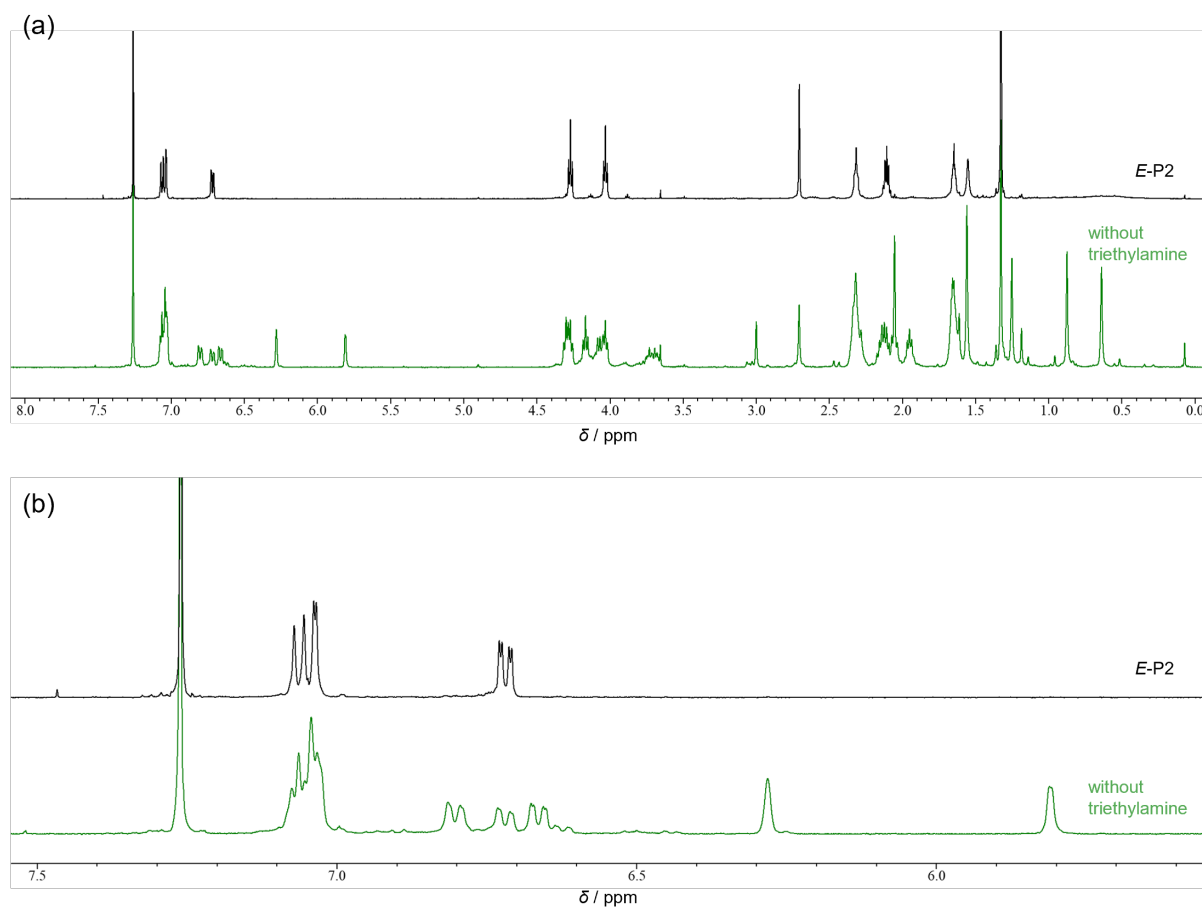

**Fig. S11** (a) Overall and (b) enlarged <sup>1</sup>H NMR spectra (400 MHz, CDCl<sub>3</sub>) of *E*-P2 and the reaction product without triethylamine.

## Photoisomerization in solution

UV/vis absorption and  $^1\text{H}$  NMR spectroscopy was employed to study photoisomerization of the main-chain HSS photoswitches in solution. For UV/vis absorption measurements, solutions of **E-P1** ( $M_n = 12900$ ), **E-P2**, and **E-P3** ( $3.00 \times 10^{-5}$  M) in spectrophotometric grade THF were prepared in a 1.0 cm quartz cuvette with a stirring bar. For  $^1\text{H}$  NMR measurements, solutions of the polymers ( $1.00 \times 10^{-4}$  M) in THF- $d_8$  were prepared in a 1.0 cm quartz cuvette with a stirring bar. The solutions were irradiated with xenon light (MAX-303, Asahi Spectra) with a 340 nm band pass filter (LX0340, Asahi Spectra) and light emitting diode (LED) light with a peak wavelength of 405 nm (CL-H1-405-9-1-B, Asahi Spectra) under stirring (Fig. S12). The irradiance was determined using an optical power meter (PM100USB and S401C, Thorlabs) prior to light irradiation (Table S1). The *E/Z* ratios were determined from UV/vis absorption spectra (Fig. 3, S13, and S14) using molar absorption coefficients ( $\epsilon$ s) of the *E* and *Z* isomers and  $^1\text{H}$  NMR spectra (Fig. 3, S13, and S14).

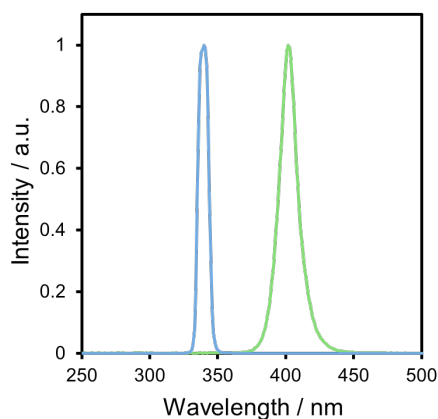

**Fig. S12** Normalized emission spectra of xenon light with 340 nm band pass filter and 405 nm LED light.

**Table S1** Irradiance of xenon light with 340 nm band pass filter and 405 nm LED light used for photoisomerization

|                              | <b>E-P1</b> |                  | <b>E-P2</b> |                  | <b>E-P3</b> |                  |
|------------------------------|-------------|------------------|-------------|------------------|-------------|------------------|
|                              | UV/vis      | $^1\text{H}$ NMR | UV/vis      | $^1\text{H}$ NMR | UV/vis      | $^1\text{H}$ NMR |
| 340 nm / $\text{mW cm}^{-2}$ | 51.6        | 31.3             | 28.2        | 31.3             | 27.1        | 31.3             |
| 405 nm / $\text{mW cm}^{-2}$ | 666         | 637              | 634         | 637              | 566         | 637              |



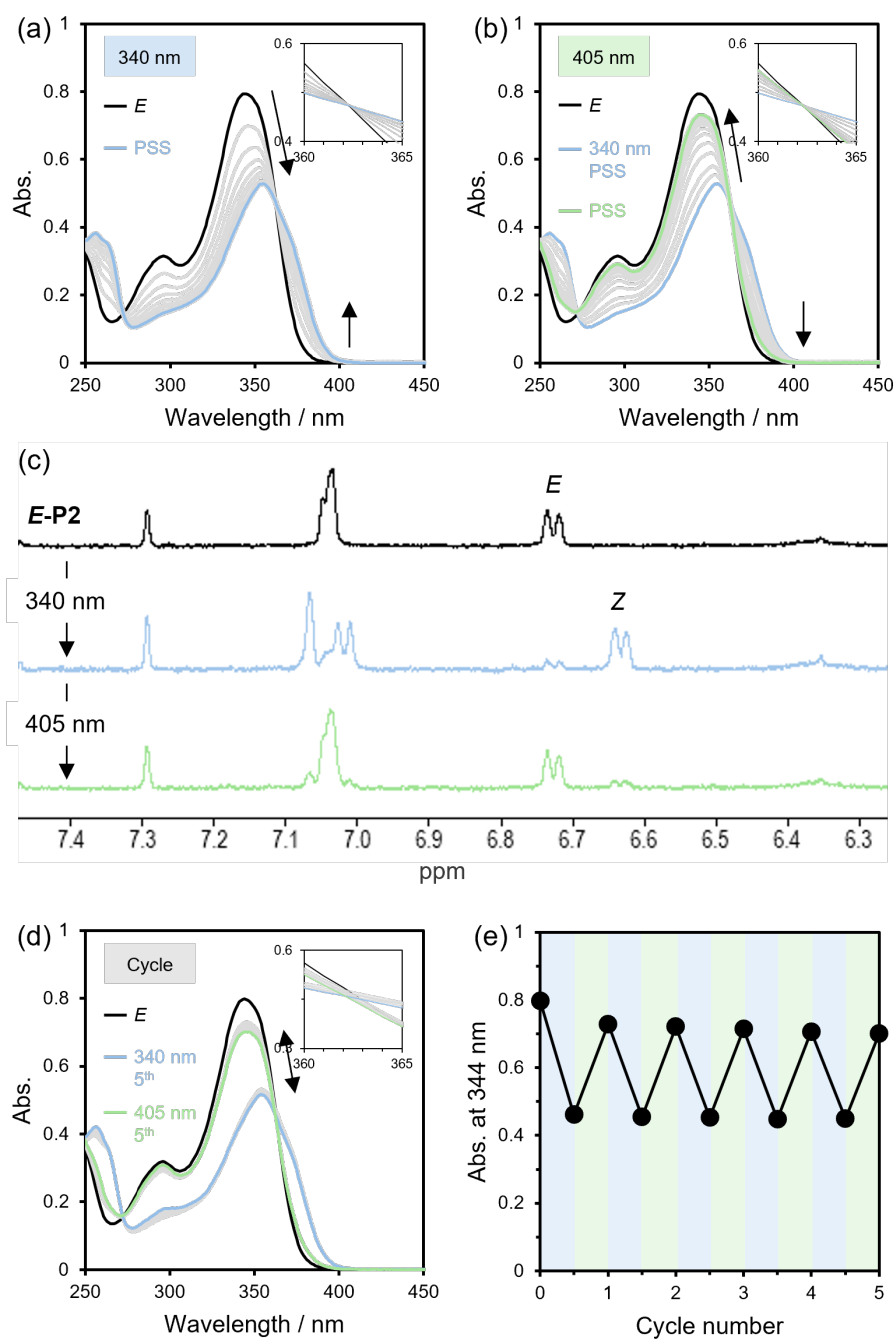

**Fig. S13** UV/vis absorption spectra of *E-P2* upon (a) irradiation with 340 nm light and (b) subsequent irradiation with 405 nm light in THF ( $3.00 \times 10^{-5}$  M). (c) <sup>1</sup>H NMR spectra (500 MHz, THF-*d*<sub>8</sub>) of *E-P2* and PSSs under 340 and 405 nm irradiation in THF-*d*<sub>8</sub> ( $1.00 \times 10^{-4}$  M). (d) UV/vis absorption spectra and (e) changes in absorbance at 344 nm upon alternating irradiation of *E-P2* with 340 and 405 nm light in THF ( $3.00 \times 10^{-5}$  M).

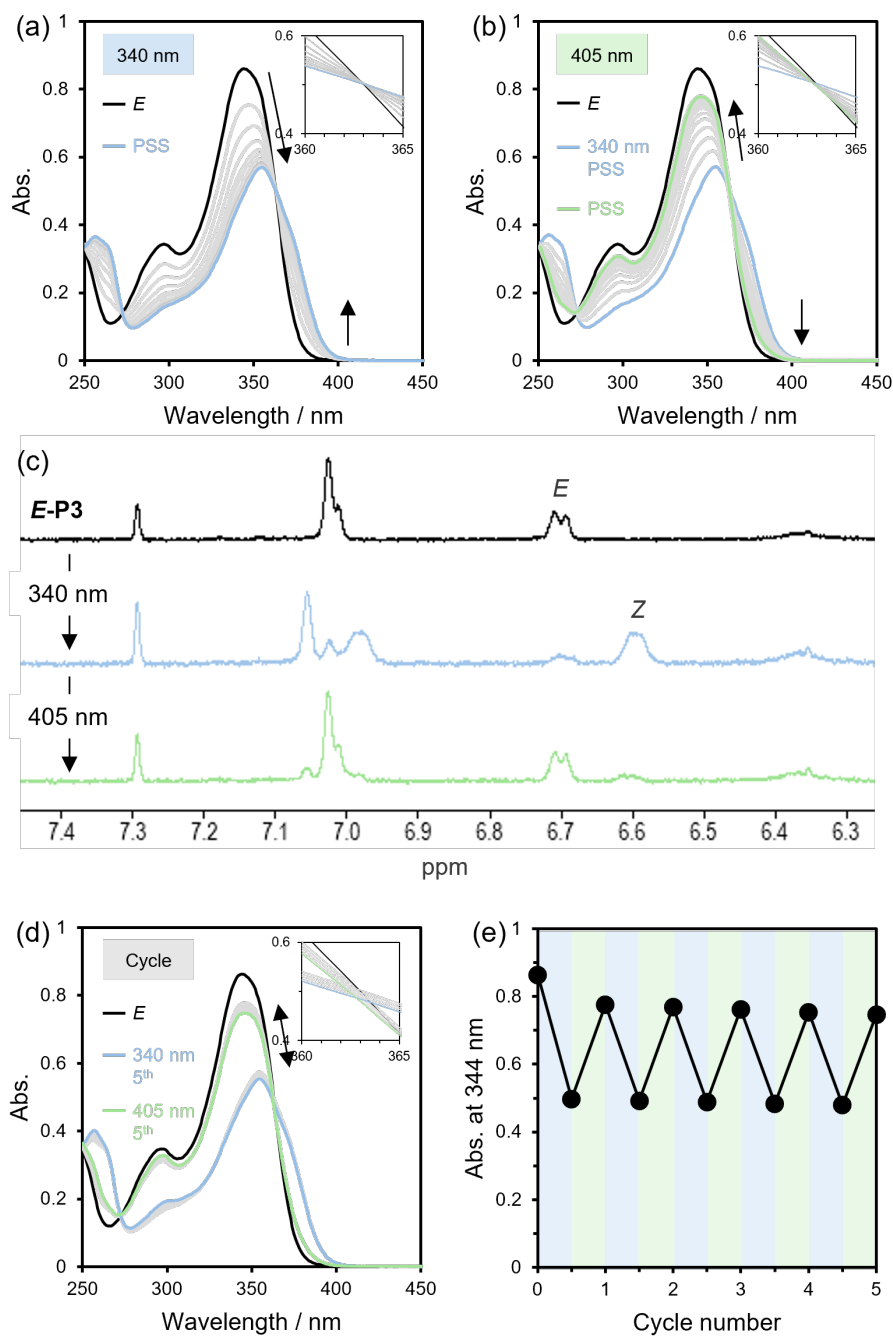

**Fig. S14** UV/vis absorption spectra of *E*-P3 upon (a) irradiation with 340 nm light and (b) subsequent irradiation with 405 nm light in THF ( $3.00 \times 10^{-5}$  M). (c) <sup>1</sup>H NMR spectra (500 MHz, THF-*d*<sub>8</sub>) of *E*-P3 and PSSs under 340 and 405 nm irradiation in THF-*d*<sub>8</sub> ( $1.00 \times 10^{-4}$  M). (d) UV/vis absorption spectra and (e) changes in absorbance at 344 nm upon alternating irradiation of *E*-P3 with 340 and 405 nm light in THF ( $3.00 \times 10^{-5}$  M).

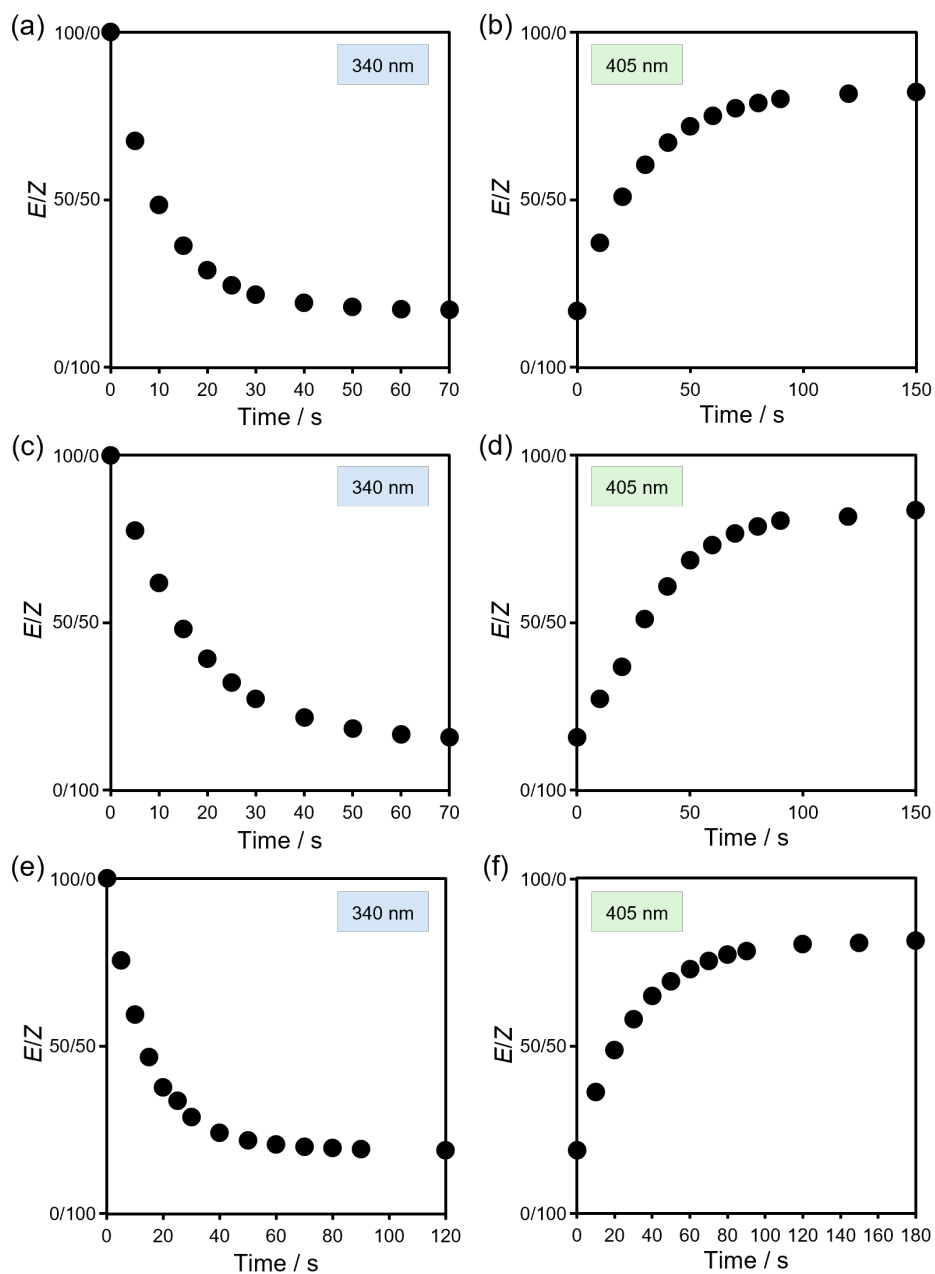

**Fig. S15** Changes in  $E/Z$  ratios upon irradiation of  $E$ -P1 ( $M_n = 12900$ ) with (a) 340 nm light and (b) subsequent 405 nm light,  $E$ -P2 with (c) 340 nm light and (d) subsequent 405 nm light, and  $E$ -P3 with (e) 340 nm light and (f) subsequent 405 nm light in THF ( $3.00 \times 10^{-5}$  M).

## DOSY NMR measurements

Z-rich **P1** ( $M_n = 13200$ ), **P2**, and **P3** were prepared by exposure of their 100% *E* polymers in THF ( $1.00 \times 10^{-3}$  M) to 300 nm LED light ( $0.40 \text{ mW cm}^{-2}$ , LDR2-100UV300, CCS) (Fig. S29) under stirring and drying in vacuum.

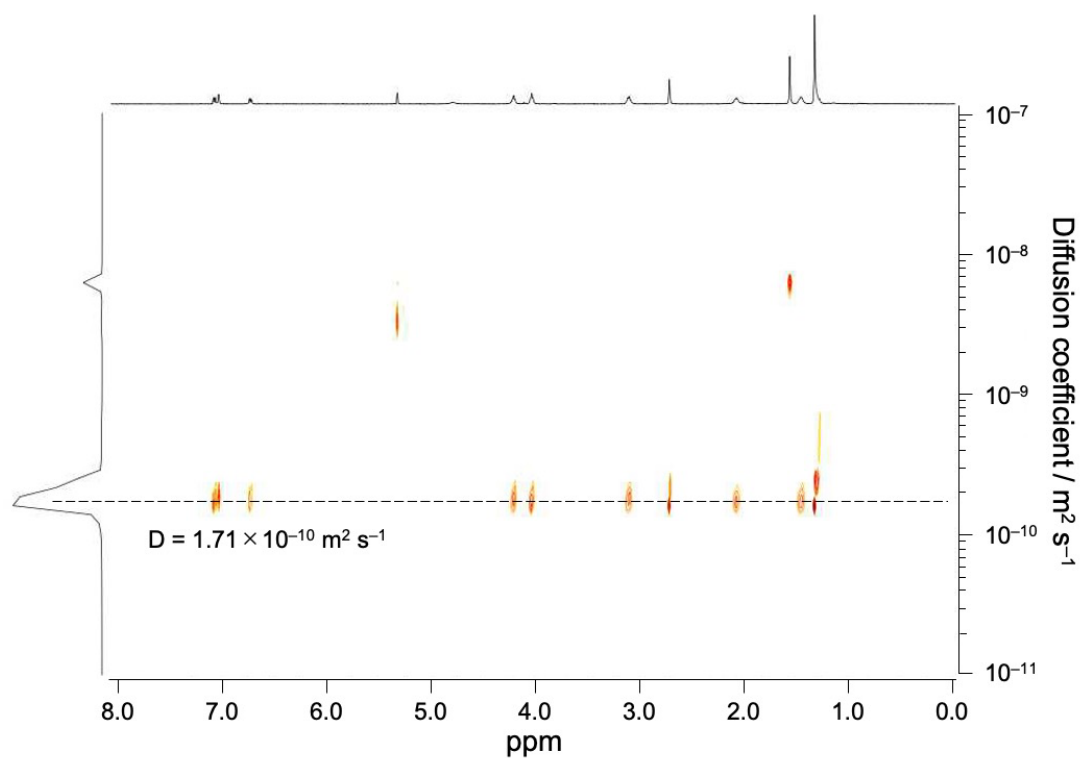

**Fig. S16** DOSY NMR spectrum (500 MHz,  $\text{CD}_2\text{Cl}_2$ ) of *E*-**P1** ( $M_n = 13200$ ).

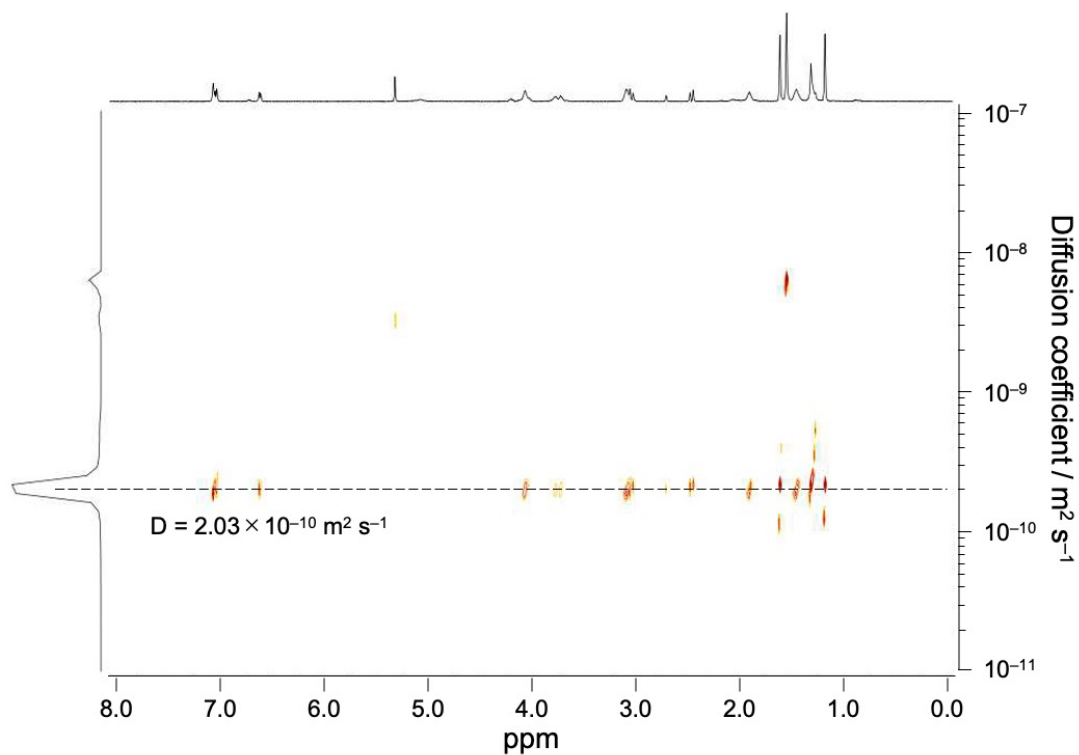

**Fig. S17** DOSY NMR spectrum (500 MHz,  $\text{CD}_2\text{Cl}_2$ ) of Z-rich **P1** (84% Z) prepared by exposure of *E*-**P1** ( $M_n = 13200$ ) in THF ( $1.00 \times 10^{-3} \text{ M}$ ) to 300 nm light.

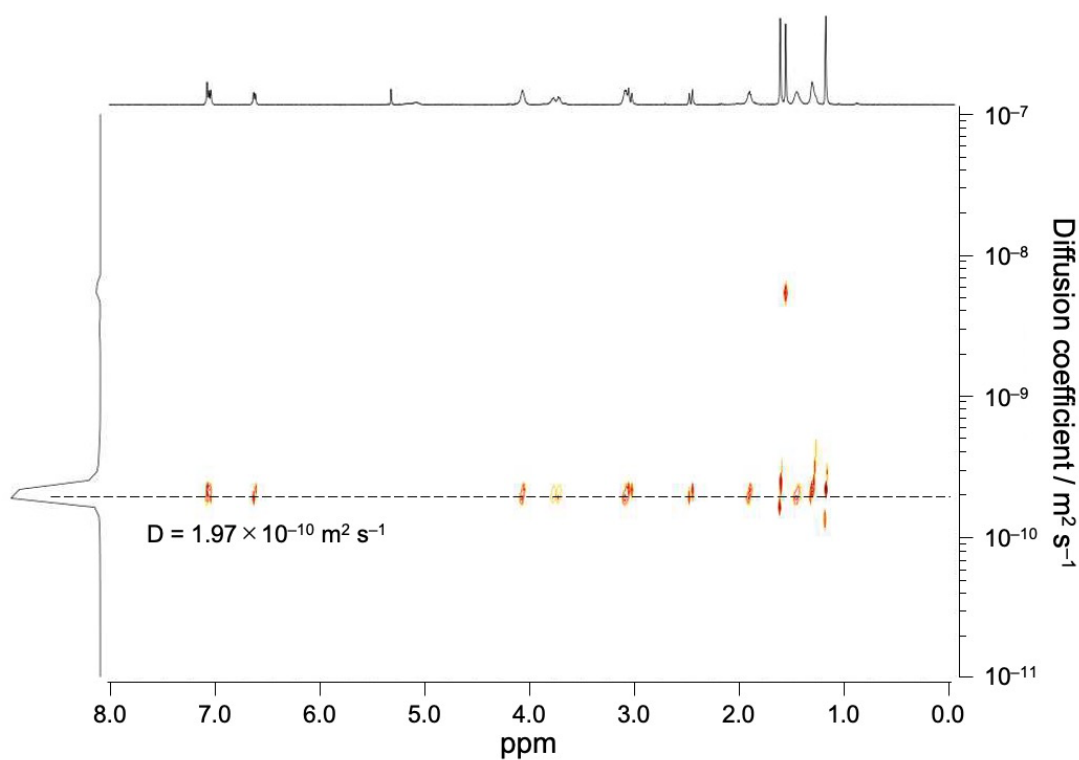

**Fig. S18** DOSY NMR spectrum (500 MHz,  $\text{CD}_2\text{Cl}_2$ ) of **Z-P1**.

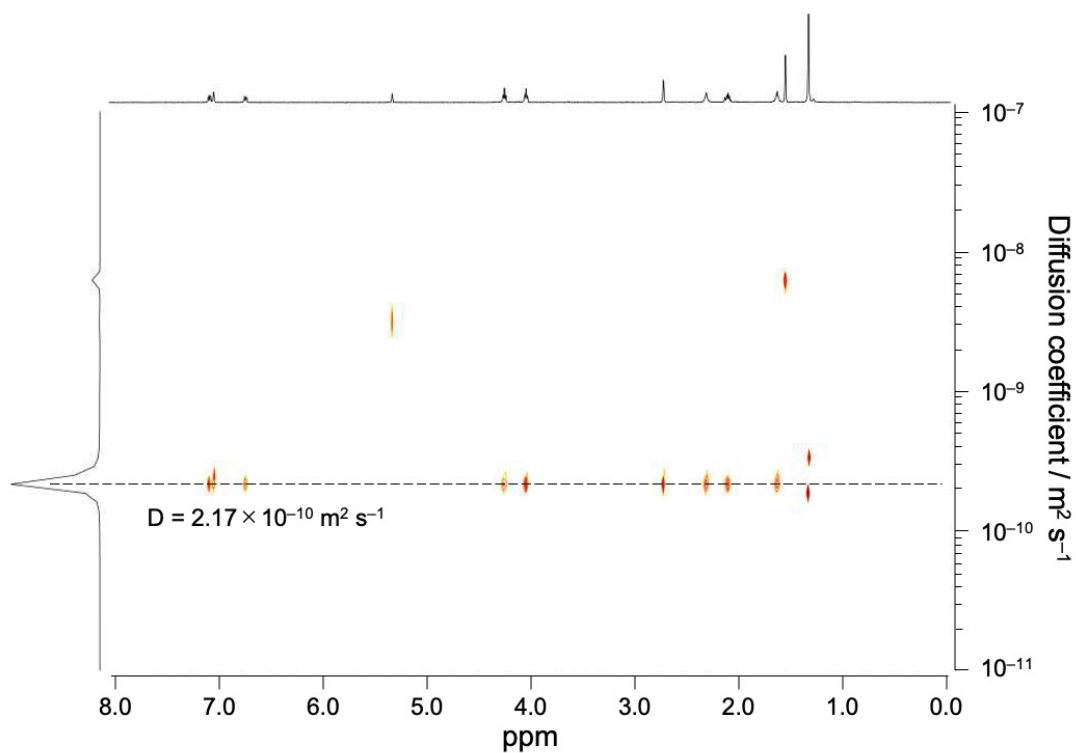

**Fig. S19** DOSY NMR spectrum (500 MHz,  $\text{CD}_2\text{Cl}_2$ ) of *E*-P2.

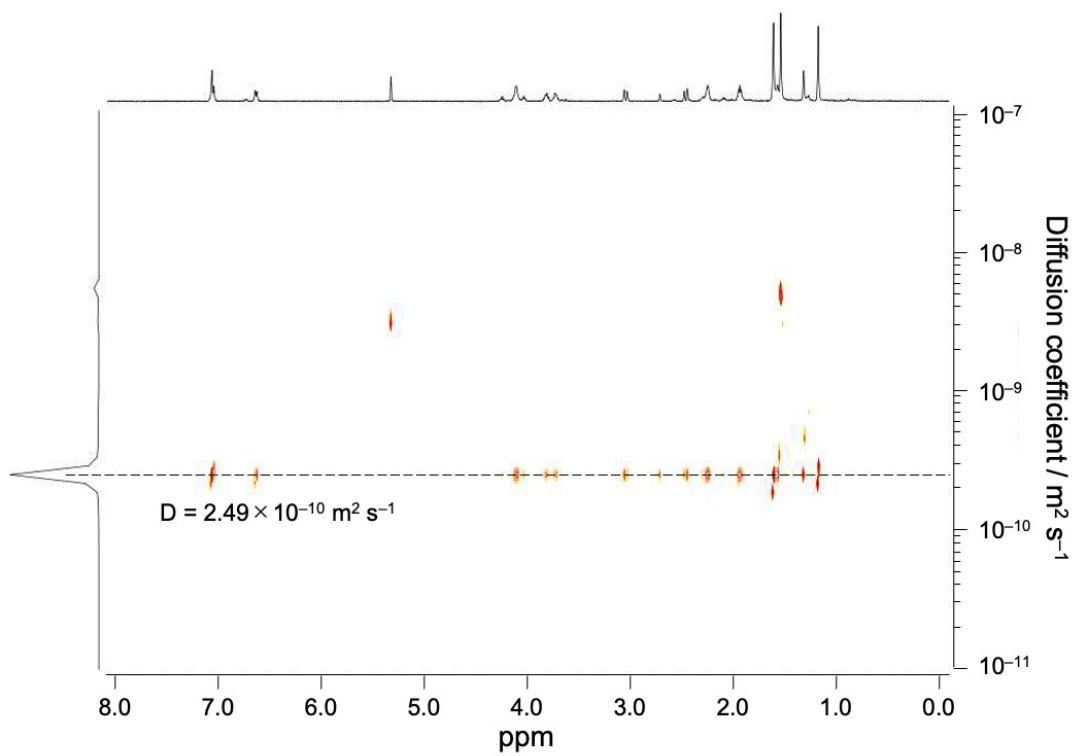

**Fig. S20** DOSY NMR spectrum (500 MHz,  $\text{CD}_2\text{Cl}_2$ ) of Z-rich P2 (84% Z) prepared by exposure of *E*-P2 in THF ( $1.00 \times 10^{-3} \text{ M}$ ) to 300 nm light.

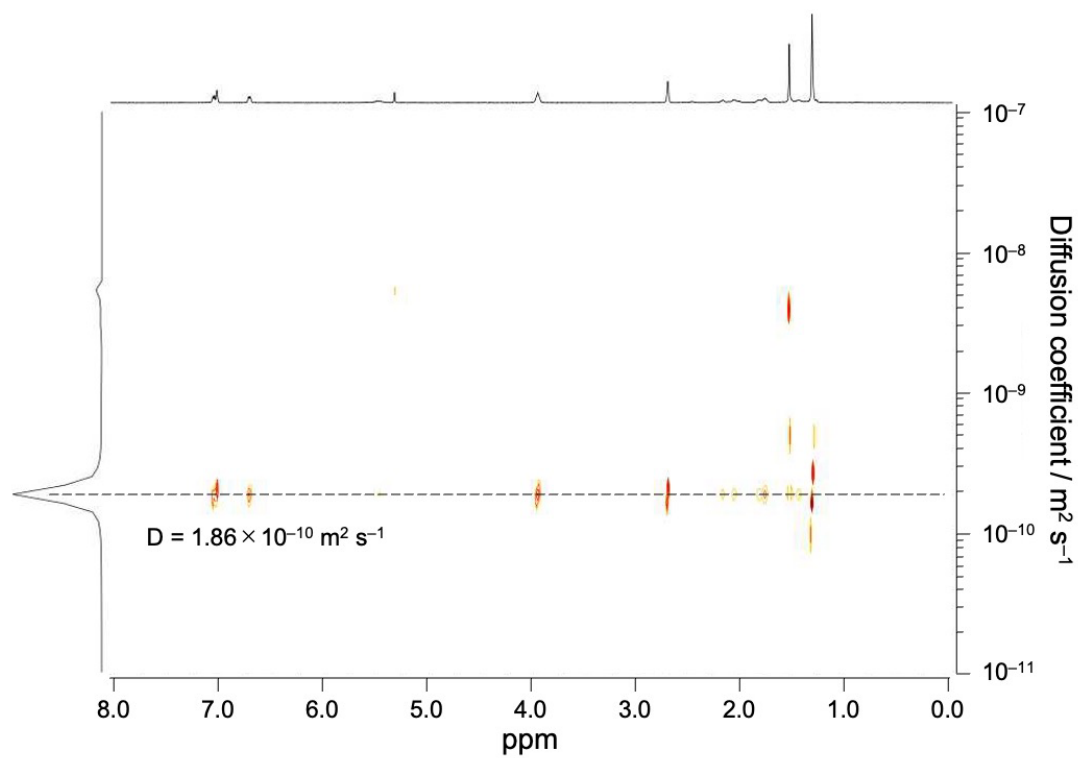

**Fig. S21** DOSY NMR spectrum (500 MHz,  $\text{CD}_2\text{Cl}_2$ ) of *E*-P3.

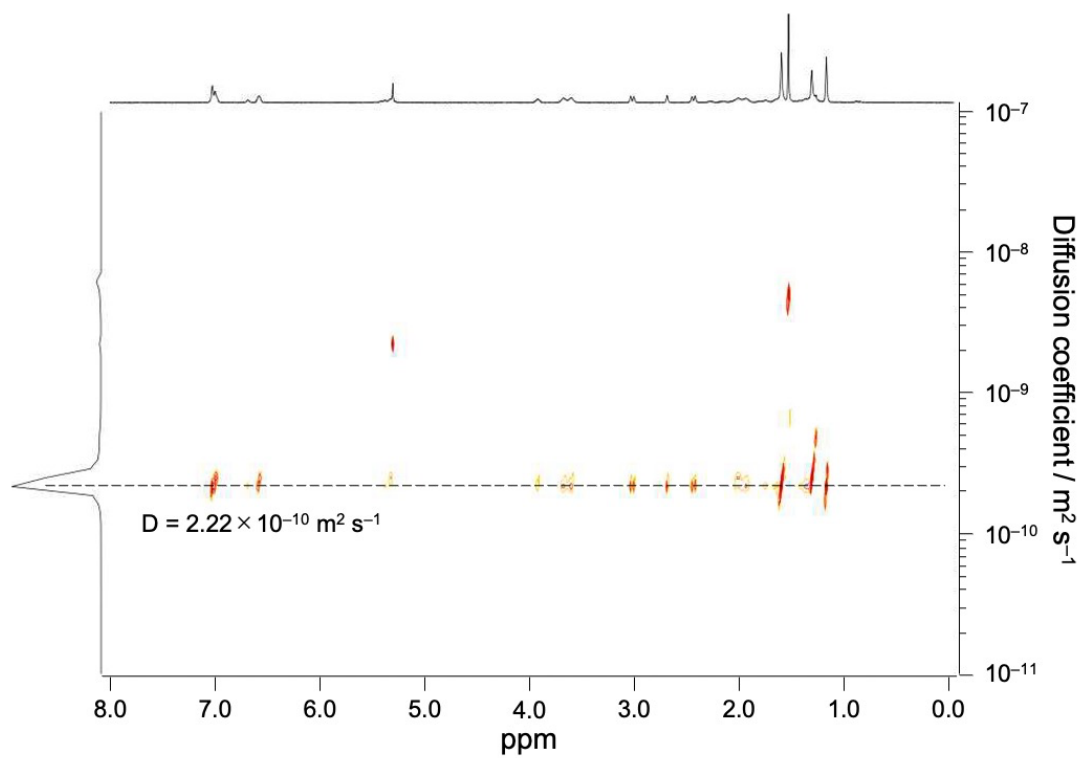

**Fig. S22** DOSY NMR spectrum (500 MHz,  $\text{CD}_2\text{Cl}_2$ ) of Z-rich P3 (80% Z) prepared by exposure of *E*-P3 in THF ( $1.00 \times 10^{-3} \text{ M}$ ) to 300 nm light.

## Macromolecular conformational changes in solution

SEC measurements were employed to study conformational changes of the single polymer chains in solution induced by photoisomerization of the main-chain HSS photoswitches. Solutions of ***E*-P1** ( $M_n = 12900$ ), ***E*-P2**, and ***E*-P3** ( $3.00 \times 10^{-5}$  M) in spectrophotometric grade THF were prepared in a 1.0 cm quartz cuvette with a stirring bar. The solutions were irradiated with 340 and 405 nm light in the same conditions as the above UV/vis absorption measurements (Fig. S12 and Table S1).

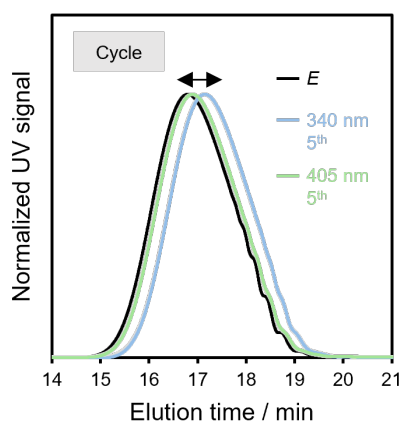

**Fig. S23** SEC curves upon alternating irradiation of ***E*-P1** ( $M_n = 12900$ ) with 340 and 405 nm light in THF ( $3.00 \times 10^{-5}$  M).



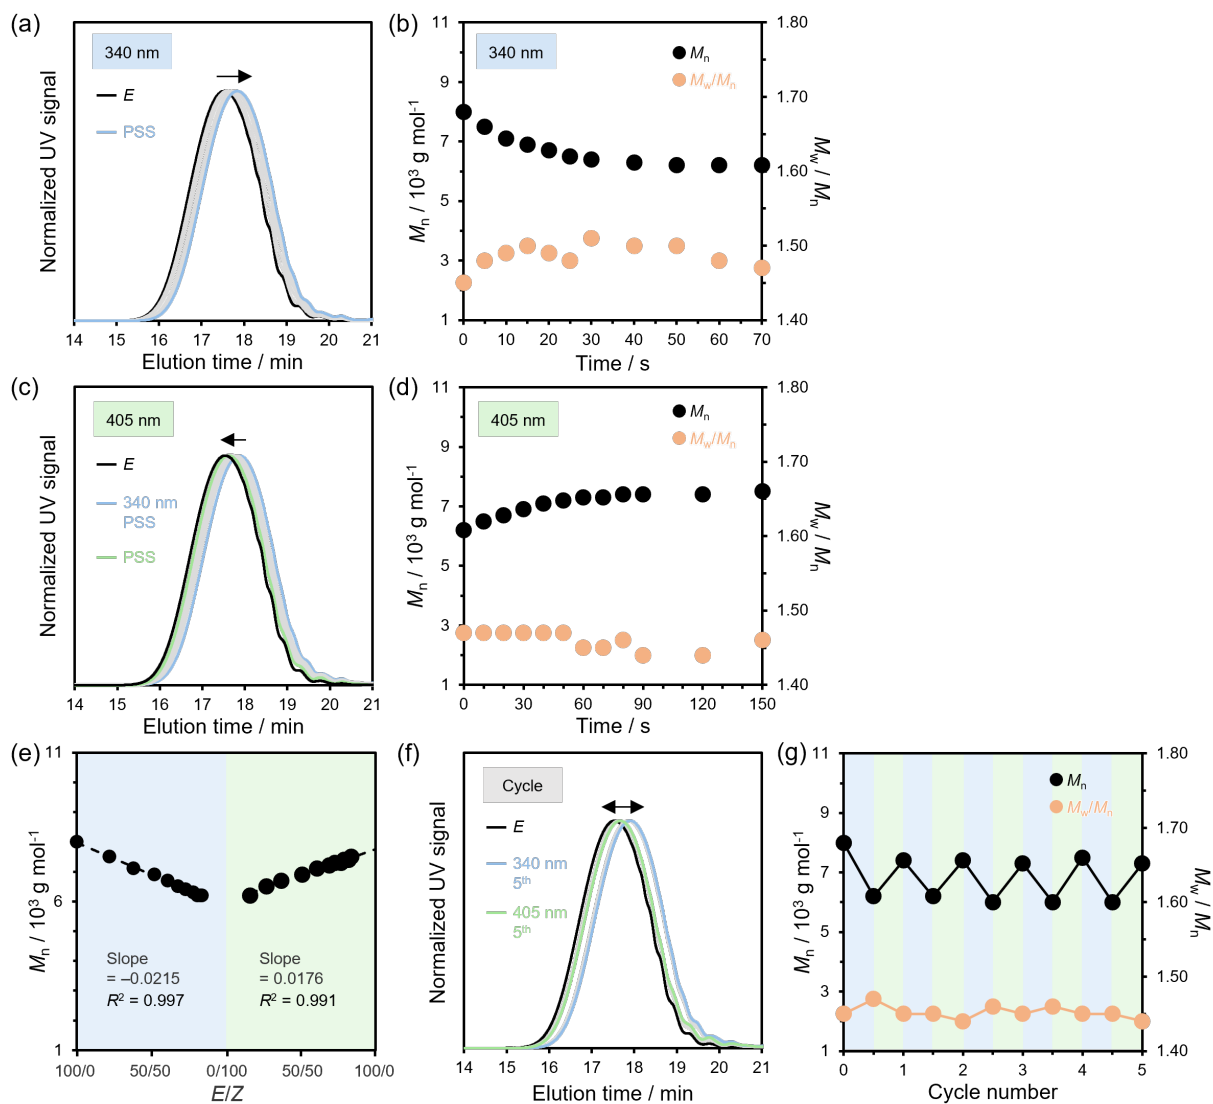

**Fig. S24** (a) SEC curves and (b) apparent  $M_n$ s and  $M_w/M_n$ s of *E*-P2 during irradiation with 340 nm light in THF ( $3.00 \times 10^{-5}$  M). (c) SEC curves and (d) apparent  $M_n$ s and  $M_w/M_n$ s of 340 nm PSS during irradiation with 405 nm light in THF ( $3.00 \times 10^{-5}$  M). (e) Apparent  $M_n$ s at different *E/Z* ratios determined from UV/vis absorption and  $^1\text{H}$  NMR spectra in irradiation of *E*-P2 with 340 nm light and subsequent irradiation of 340 nm PSS with 405 nm light in THF ( $3.00 \times 10^{-5}$  M). (f) SEC curves and (g) changes in apparent  $M_n$ s and  $M_w/M_n$ s upon alternating irradiation of *E*-P2 with 340 and 405 nm light in THF ( $3.00 \times 10^{-5}$  M).

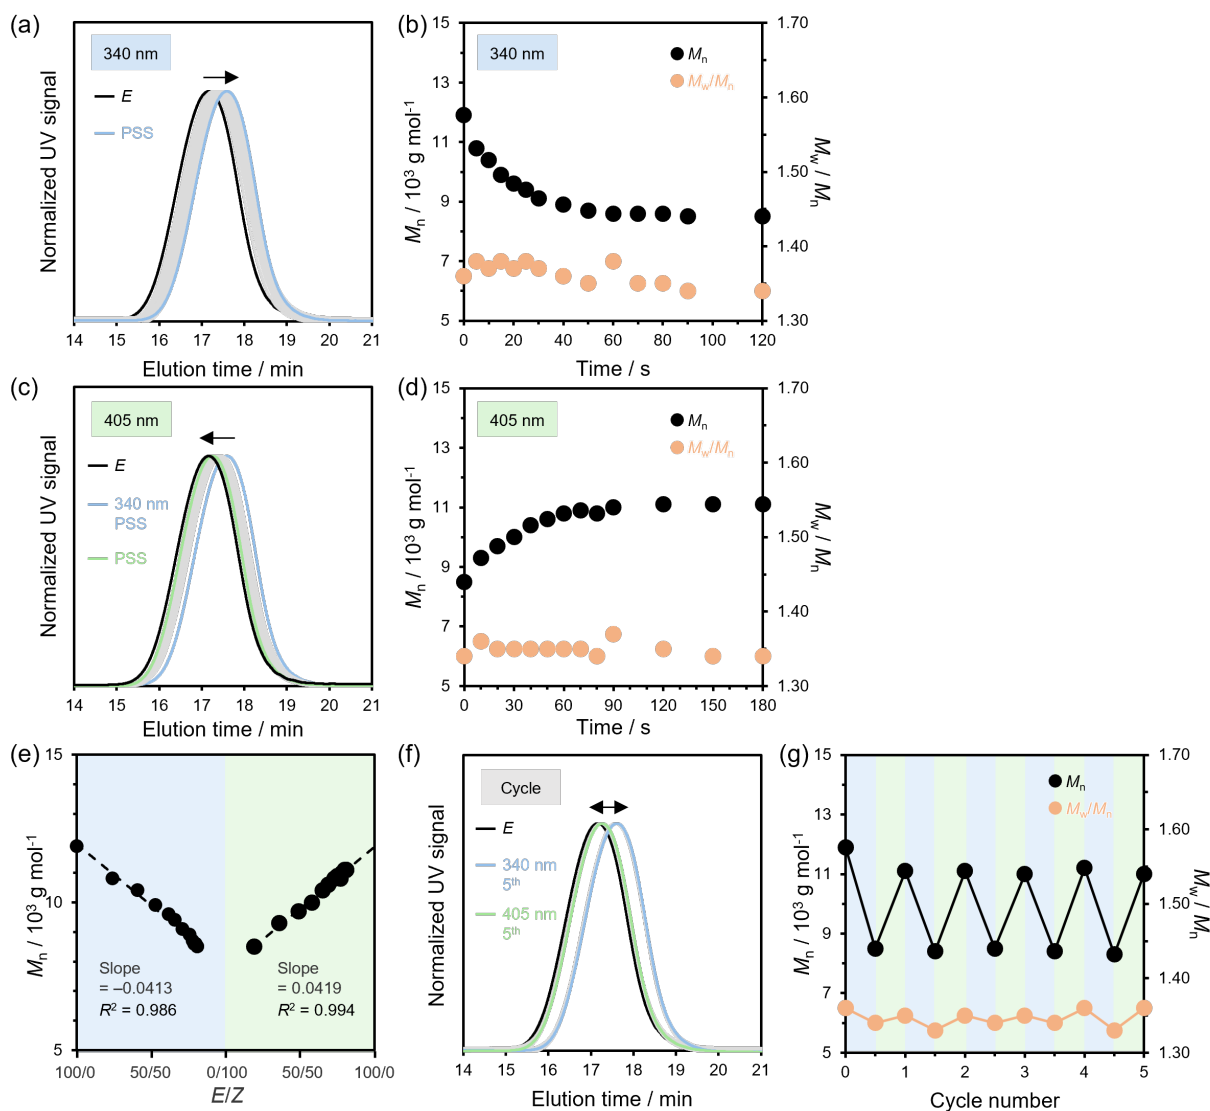

**Fig. S25** (a) SEC curves and (b) apparent  $M_n$ s and  $M_w/M_n$ s of *E*-P3 during irradiation with 340 nm light in THF ( $3.00 \times 10^{-5}$  M). (c) SEC curves and (d) apparent  $M_n$ s and  $M_w/M_n$ s of 340 nm PSS during irradiation with 405 nm light in THF ( $3.00 \times 10^{-5}$  M). (e) Apparent  $M_n$ s at different *E/Z* ratios determined from UV/vis absorption and  $^1\text{H}$  NMR spectra in irradiation of *E*-P3 with 340 nm light and subsequent irradiation of 340 nm PSS with 405 nm light in THF ( $3.00 \times 10^{-5}$  M). (f) SEC curves and (g) changes in apparent  $M_n$ s and  $M_w/M_n$ s upon alternating irradiation of *E*-P3 with 340 and 405 nm light in THF ( $3.00 \times 10^{-5}$  M).

## Hydrogen bonding in P1

FTIR,  $^1\text{H}$  NMR, and UV/vis absorption spectroscopy was employed to study hydrogen bonding of the urethane linkages of **P1** in solution and the **E-P1** powder. Transmittance measurements were employed to study solubilities of **P1**.

For FTIR measurements, solutions of **E-P1** ( $M_n = 13200$ ) and **Z-P1** ( $100 \text{ mg mL}^{-1}$ ) in spectrophotometric grade DCM, chloroform, THF, and toluene were prepared. The toluene solution of **Z-P1** (0.90 mM) in a 0.1 cm quartz cuvette was irradiated with LED light with a peak wavelength of 405 nm ( $19.6 \text{ mW cm}^{-2}$ , LDR2-100VL405-W1U, CCS) (Fig. S29) and concentrated. The exposure distance was 80 mm.

For  $^1\text{H}$  NMR measurements, solutions of **E-P1** ( $M_n = 12900$  and 13200) and **Z-P1** in  $\text{CD}_2\text{Cl}_2$ ,  $\text{CDCl}_3$ , THF- $d_8$ , and toluene- $d_8$  were prepared. The toluene- $d_8$  solution of **Z-P1** (0.90 mM) in a quartz NMR tube was irradiated with LED light with a peak wavelength of 405 nm ( $19.6 \text{ mW cm}^{-2}$ , LDR2-100VL405-W1U, CCS) (Fig. S29). The exposure distance was 80 mm.

For transmittance measurements, solutions of **Z-P1** (0.10, 0.30, and 0.90 mM) in spectrophotometric grade toluene were prepared in a 1.0 cm quartz cuvette. The solutions were irradiated with LED light with a peak wavelength of 300 nm ( $0.40 \text{ mW cm}^{-2}$ , LDR2-100UV300, CCS) and 405 nm ( $19.6 \text{ mW cm}^{-2}$ , LDR2-100VL405-W1U, CCS) (Fig. S29). The exposure distance was 40 mm for the 300 nm light and 80 mm for the 405 nm light. Transmittance of the solutions was monitored at 600 nm, where the main-chain HSS photoswitches have no absorption. The light irradiation was continued until the transmittance reached a stationary state.

For UV/vis absorption measurements, solution of **Z-P1** (0.10, 0.30, and 0.90 mM) in spectrophotometric grade toluene were prepared in a 0.1 cm quartz cuvette. The solutions were irradiated with LED light with a peak wavelength of 405 nm ( $19.6 \text{ mW cm}^{-2}$ , LDR2-100VL405-W1U, CCS) (Fig. S29). The exposure distance was 80 mm. The *E/Z* ratios were determined from UV/vis absorption spectra (Fig. S31) using  $\epsilon$ s of the *E* and *Z* isomers.

For supporting videos (Video S1–S3), solutions of **Z-P1** (0.90 mM) in spectrophotometric grade toluene were prepared in a 1.0 cm quartz cuvette. The solutions were irradiated with LED light with a peak wavelength of 405 nm (CL-H1-405-9-1-B, Asahi Spectra) and then xenon light (MAX-303, Asahi

Spectra) with a 300 nm band pass filter (LX0300, Asahi Spectra) or LED light with a peak wavelength of 365 nm (CL-H1-365-9-1-B, Asahi Spectra).

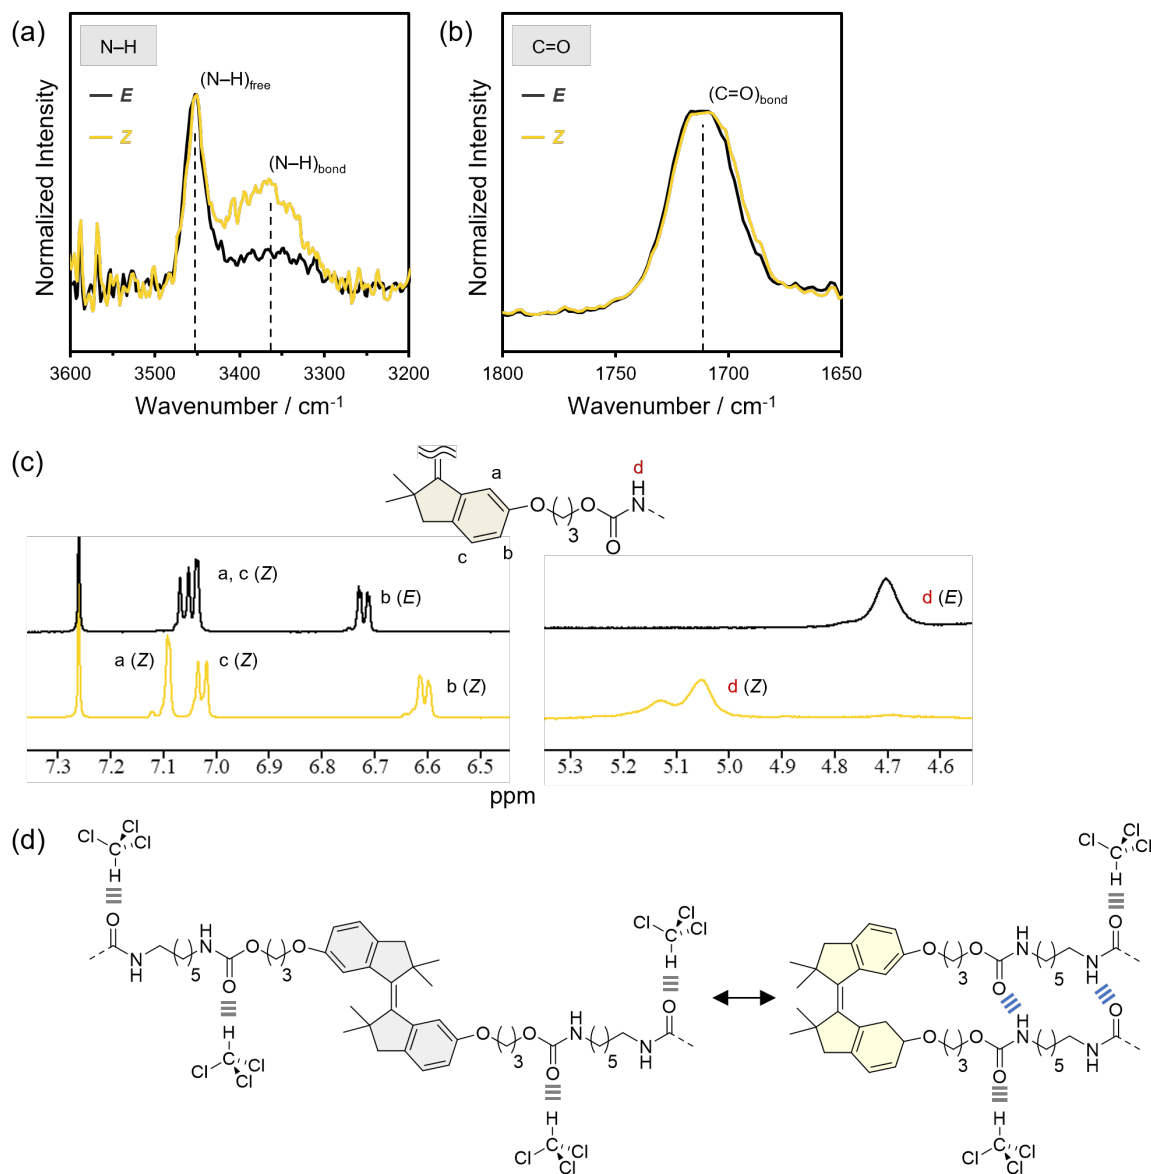

**Fig. S26** FTIR spectra of  $E$ -P1 ( $M_n = 13200$ ) and  $Z$ -P1 in chloroform ( $100 \text{ mg mL}^{-1}$ ) focused on (a) N–H and (b) C=O stretching vibration. (c)  $^1\text{H}$  NMR spectra (500 MHz) of  $E$ -P1 ( $M_n = 13200$ ) and  $Z$ -P1 in  $\text{CDCl}_3$ . (d) Illustration of hydrogen bonding between urethane linkages and chloroform (gray) in  $E$ -P1 and intrachain hydrogen bonding between urethane linkages (blue) in  $Z$ -P1.

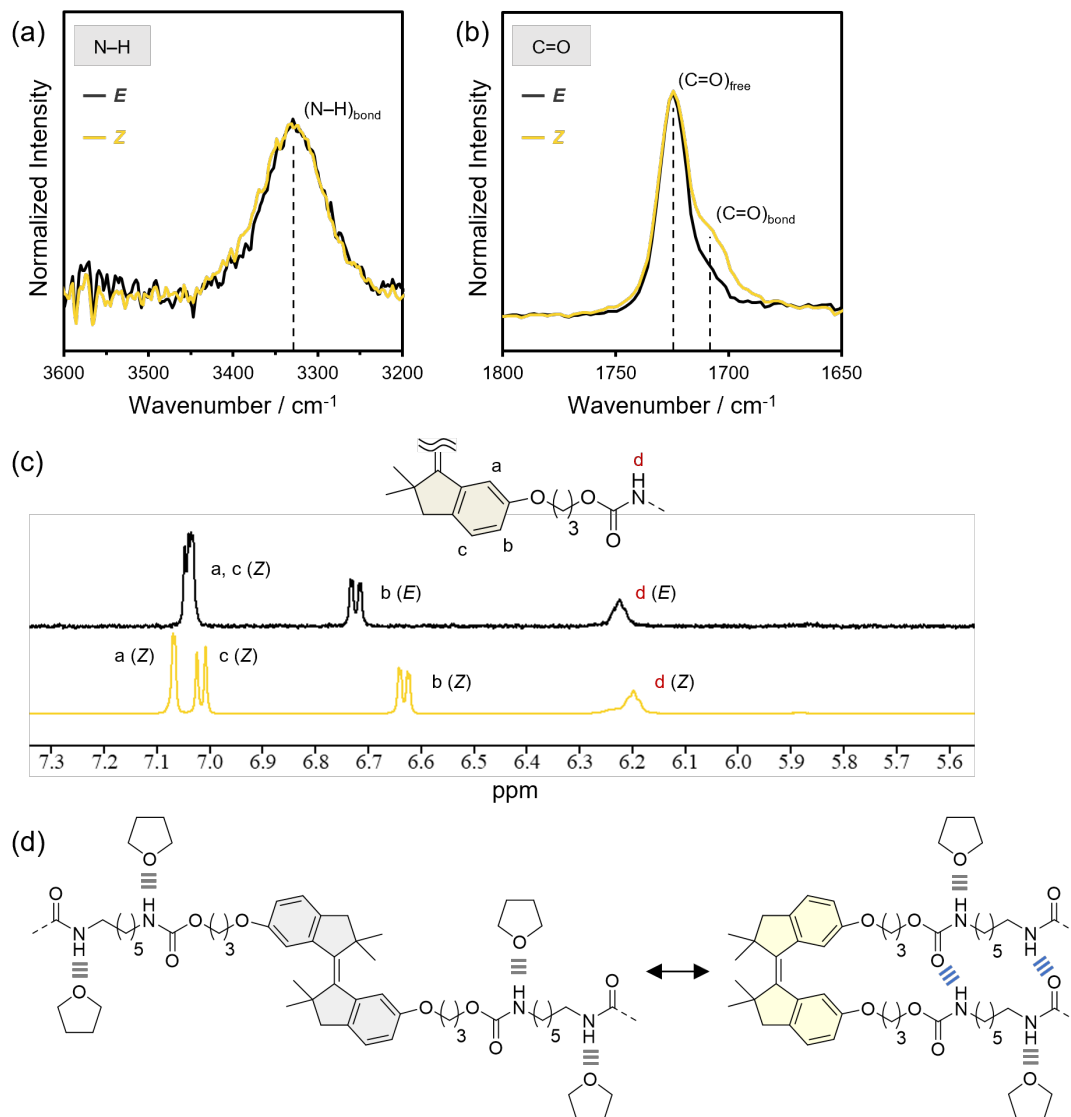

**Fig. S27** FTIR spectra of *E*-P1 ( $M_n = 13200$ ) and *Z*-P1 in THF ( $100 \text{ mg mL}^{-1}$ ) focused on (a) N–H and (b) C=O stretching vibration. (c)  $^1\text{H}$  NMR spectra (500 MHz) of *E*-P1 ( $M_n = 12900$ ) and *Z*-P1 in  $\text{THF-}d_8$ . (d) Illustration of hydrogen bonding between urethane linkages and THF (gray) in *E*-P1 and intrachain hydrogen bonding between urethane linkages (blue) in *Z*-P1.

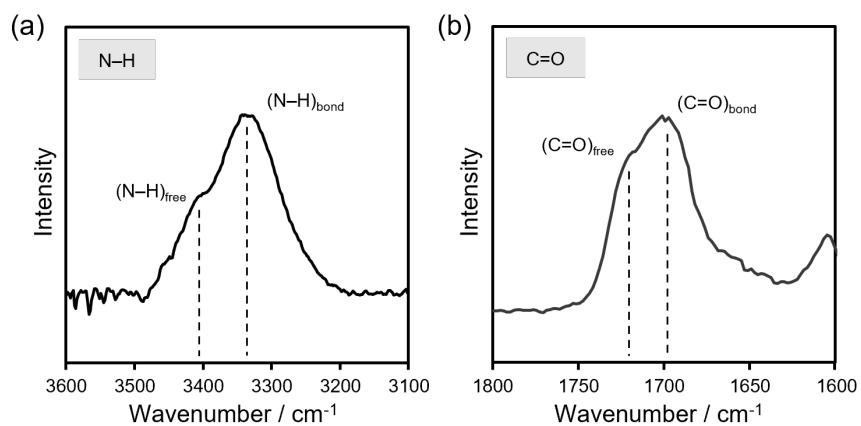

**Fig. S28** FTIR spectrum of *E-P1* powder ( $M_n = 13200$ ) focused on (a) N–H and (b) C=O stretching vibration.

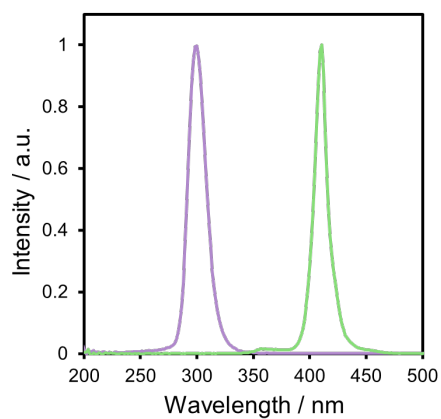

**Fig. S29** Normalized emission spectra of LED light with a peak wavelength of 300 or 405 nm.

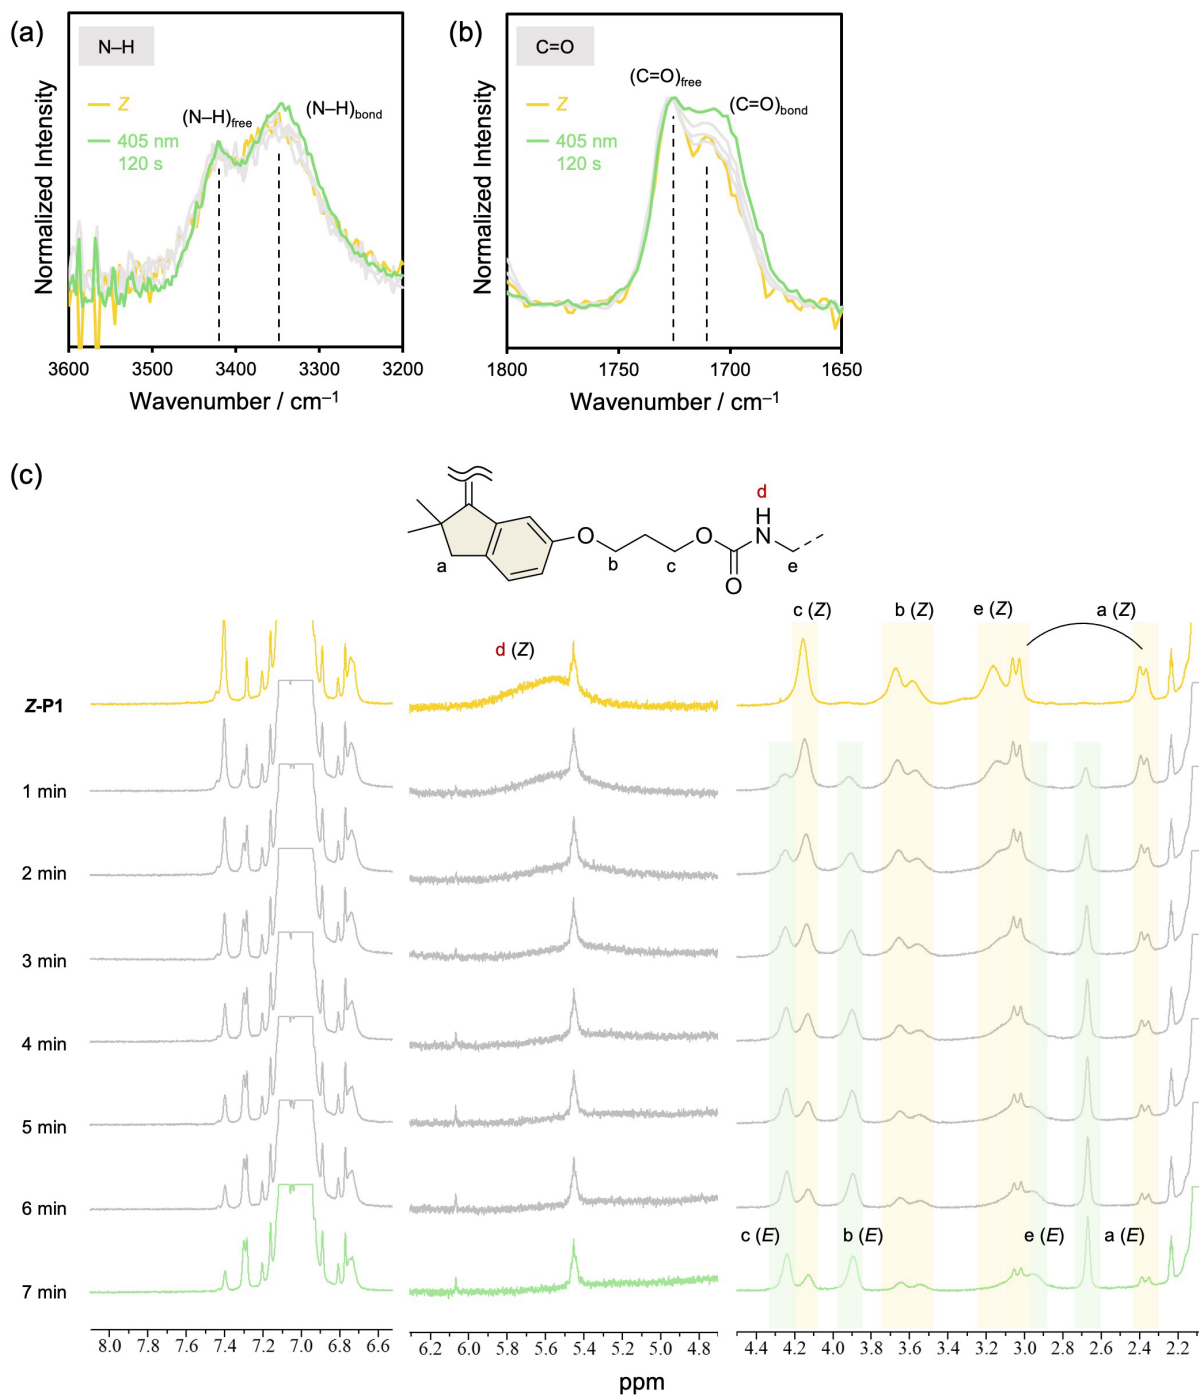

**Fig. S30** Changes in FTIR spectra of **Z-P1** in toluene focused on (a) N–H and (b) C=O stretching vibration and (c) <sup>1</sup>H NMR spectra (400 MHz) of **Z-P1** in toluene-*d*<sub>8</sub> (0.90 mM) under 405 nm light irradiation.

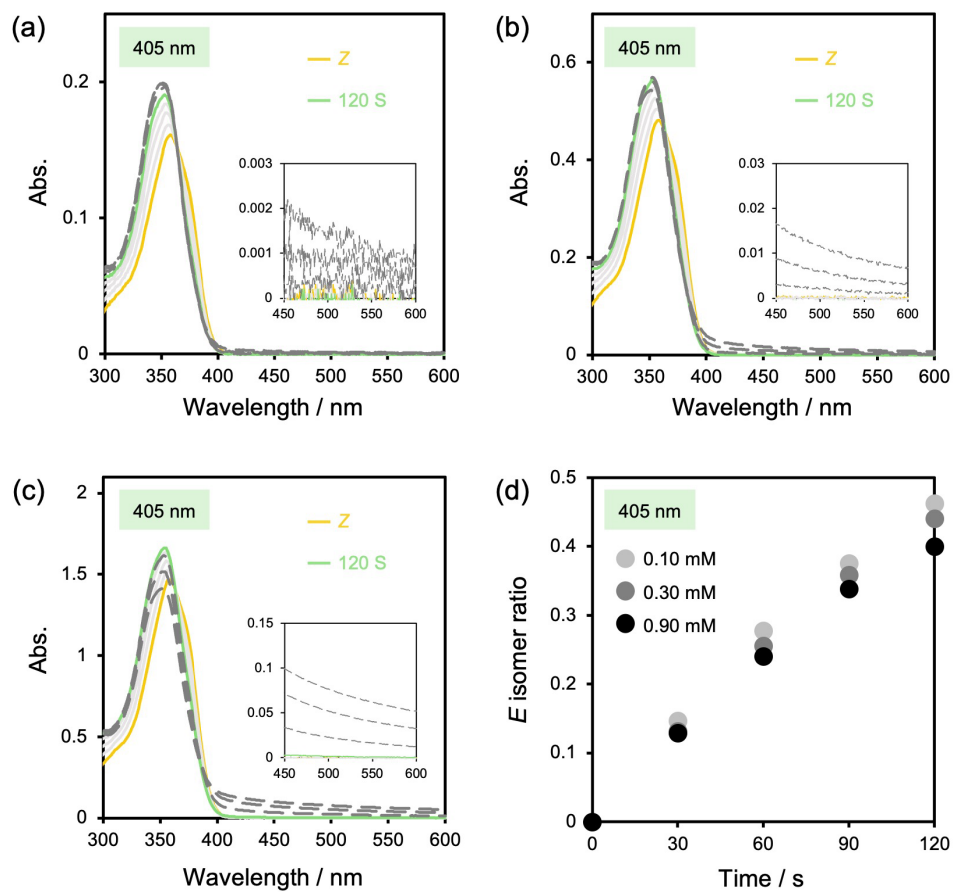

**Fig. S31** UV/vis absorption spectra of **Z-P1** upon irradiation with 405 nm light in toluene at (a) 0.1 mM, (b) 0.3 mM, and (c) 0.9 mM. (d) Changes in *E/Z* ratios upon irradiation of **Z-P1** with 405 nm light in toluene.



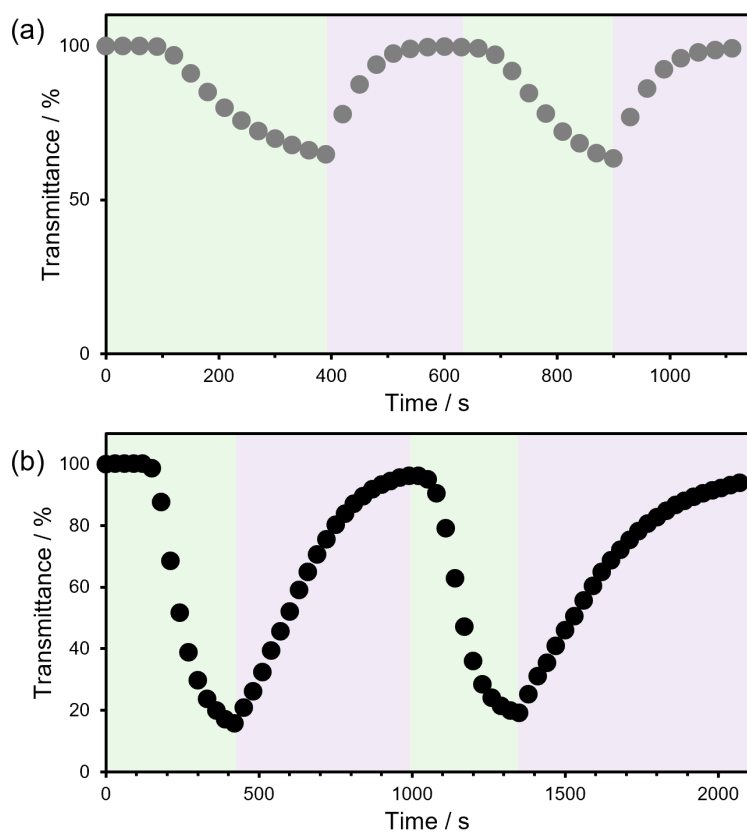

**Fig. S32** Transmittance changes of toluene solutions of **Z-P1** at (a) 0.30 mM and (b) 0.90 mM during alternating irradiation with 405 and 300 nm light.

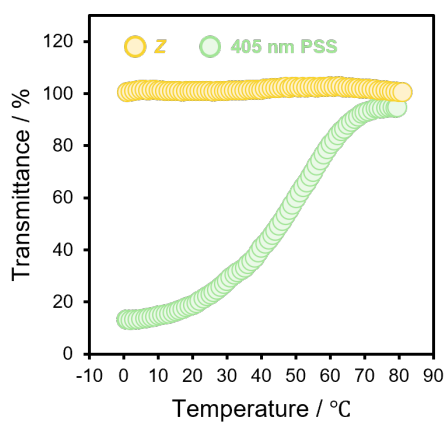

**Fig. S33** Transmittance changes of toluene solutions (0.90 mM) of **Z-P1** and 405 nm PSS with ca. 80% *E* isomer during heating from 0 °C to 80 °C at a heating rate of 5 °C min<sup>-1</sup>.

## Thermal properties in bulk

TGA and DSC were employed to study thermal properties of the polymers in the bulk state.  $^1\text{H}$  NMR and SEC measurements were employed to study thermal isomerization of the main-chain HSS photoswitches in the bulk state.

For DSC measurements, **P1** ( $M_n = 13200$ ), **P2**, and **P3** with two different *E/Z* ratios were prepared by exposure of their 100% *E* polymers in THF ( $1.00 \times 10^{-3}$  M) to 300 nm LED light ( $0.40 \text{ mW cm}^{-2}$ , LDR2-100UV300, CCS) (Fig. S29) under stirring and drying in vacuum (Fig. S37–S39). DSC measurements were performed by heating three times from  $-50$  °C to  $200$  °C for **E-P1** ( $M_n = 13200$ ), **Z-P1**, **E-P2**, and **E-P3** (Fig. S35), from  $-50$  °C to  $90$  °C for **P1** ( $M_n = 13200$ ) with the different *E/Z* ratios, and from  $-50$  °C to  $80$  °C for **P2** and **P3** with the different *E/Z* ratios at a heating rate of  $10$  °C  $\text{min}^{-1}$  under nitrogen atmosphere. Inflection points of the third scans were used to determine the  $T_g$ s (Fig. S40).

For thermal isomerization, **E-P1** ( $M_n = 13200$ ), **Z-P1**, **E-P2**, and **E-P3** (1 mg) were placed in a glass vial and heated at  $80$ ,  $100$ ,  $120$ , and  $140$  °C in vacuum for different periods, and  $^1\text{H}$  NMR spectra of the resulting polymers were measured in  $\text{CDCl}_3$  to determine the *E/Z* ratios.

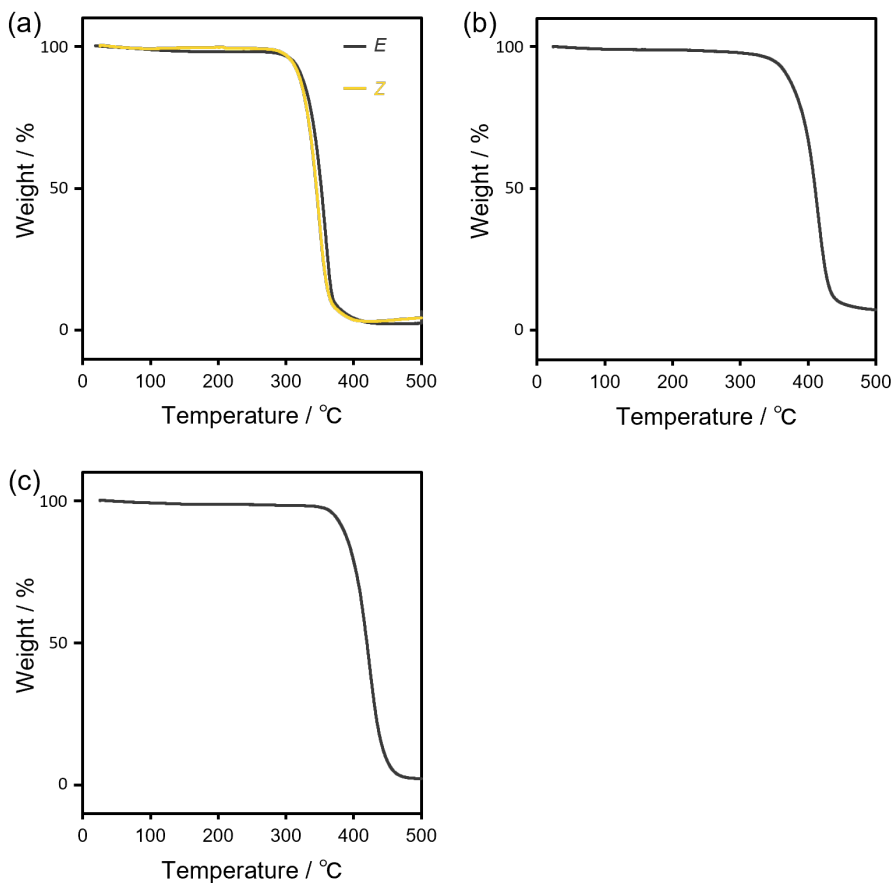

**Fig. S34** TGA curves of (a) *E-P1* ( $M_n = 13200$ ) and *Z-P1*, (b) *E-P2*, and (c) *E-P3*.

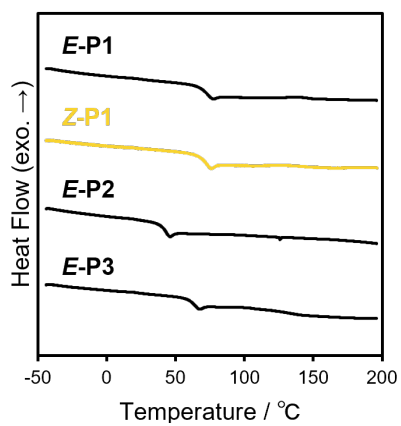

**Fig. S35** DSC curves of *E-P1* ( $M_n = 13200$ ), *Z-P1*, *E-P2*, and *E-P3*.

**Table S2** Temperatures at 5% weight loss ( $T_{5\%s}$ ) and  $T_g$ s of **E-P1** ( $M_n = 13200$ ), **Z-P1**, **E-P2**, and **E-P3** in TGA and DSC

|                              | <b>E-P1</b> | <b>Z-P1</b> | <b>E-P2</b> | <b>E-P3</b> |
|------------------------------|-------------|-------------|-------------|-------------|
| $T_{5\%}^a / ^\circ\text{C}$ | 309         | 307         | 350         | 371         |
| $T_g^b / ^\circ\text{C}$     | 73          | 72          | 44          | 64          |

<sup>a</sup>Determined by TGA. <sup>b</sup>Inflection points in DSC curves.

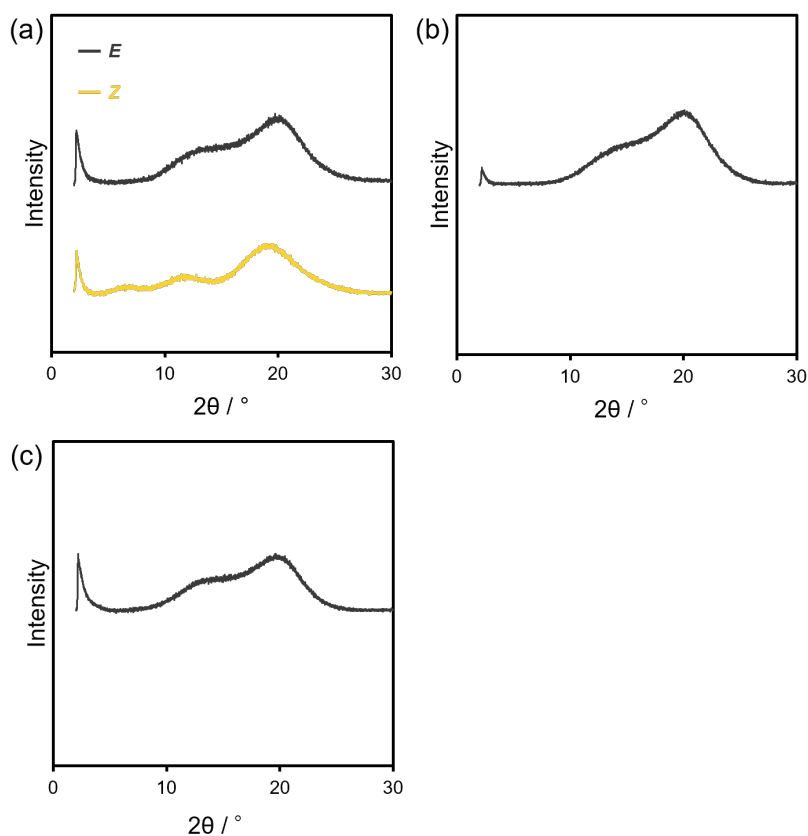

**Fig. S36** XRD profiles of (a) **E-P1** ( $M_n = 13200$ ) and **Z-P1**, (b) **E-P2**, and (c) **E-P3**.

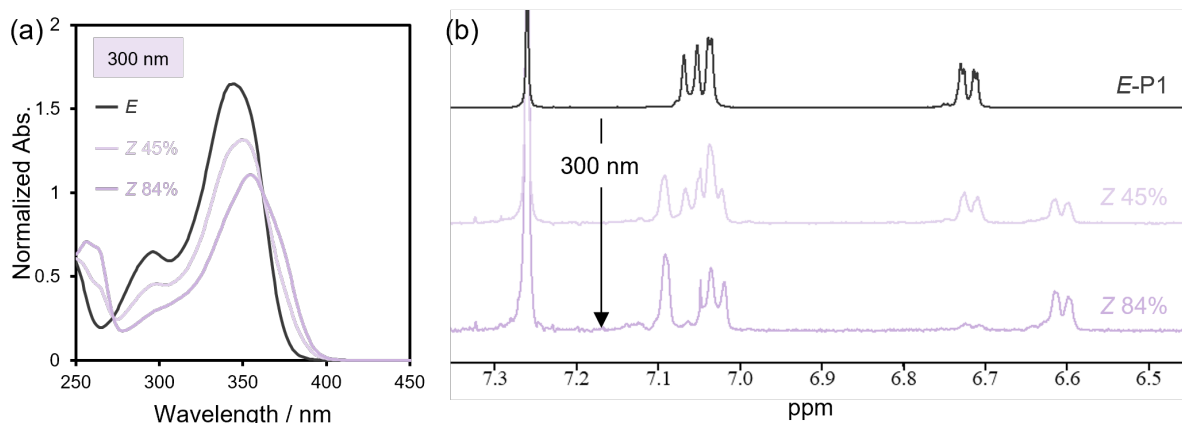

**Fig. S37** (a) UV/vis absorption spectra and (b) <sup>1</sup>H NMR spectra (500 MHz, CDCl<sub>3</sub>) of **P1** ( $M_n = 13200$ ) with different *E/Z* ratios prepared by exposure of **E-P1** ( $M_n = 13200$ ) in THF ( $1.00 \times 10^{-3}$  M) to 300 nm light. UV/vis absorption spectra were measured in THF ( $1.00 \times 10^{-3}$  M) and normalized at 362 nm.

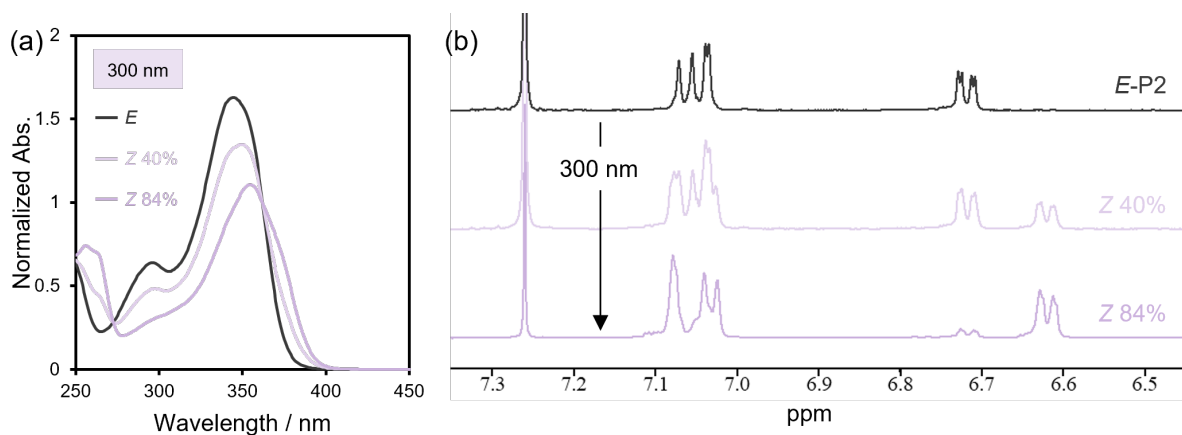

**Fig. S38** (a) UV/vis absorption spectra and (b) <sup>1</sup>H NMR spectra (500 MHz, CDCl<sub>3</sub>) of **P2** with different *E/Z* ratios prepared by exposure of **E-P2** in THF ( $1.00 \times 10^{-3}$  M) to 300 nm light. UV/vis absorption spectra were measured in THF ( $1.00 \times 10^{-3}$  M) and normalized at 362 nm.

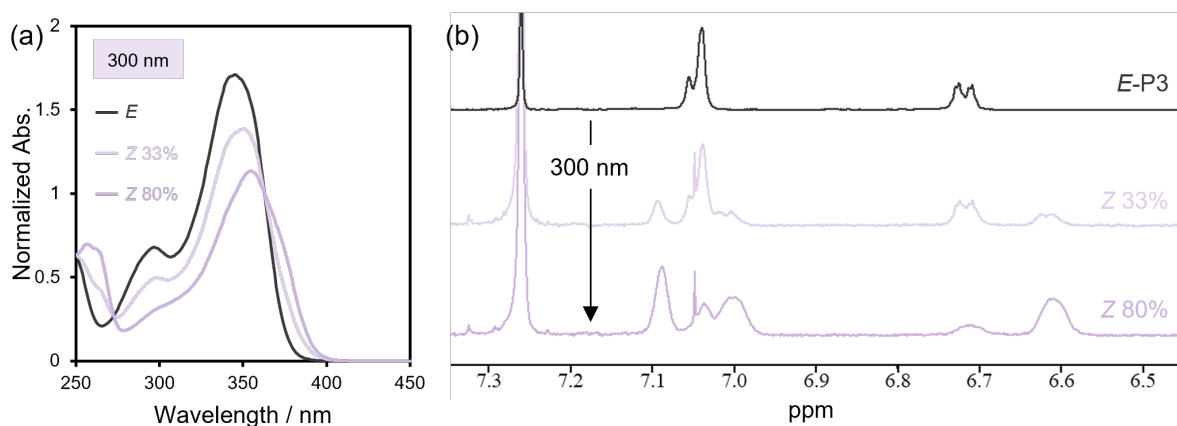

**Fig. S39** (a) UV/vis absorption spectra and (b)  $^1\text{H}$  NMR spectra (500 MHz,  $\text{CDCl}_3$ ) of **P3** with different *E/Z* ratios prepared by exposure of *E*-**P3** in THF ( $1.00 \times 10^{-3}$  M) to 300 nm light. UV/vis absorption spectra were measured in THF ( $1.00 \times 10^{-3}$  M) and normalized at 363 nm.

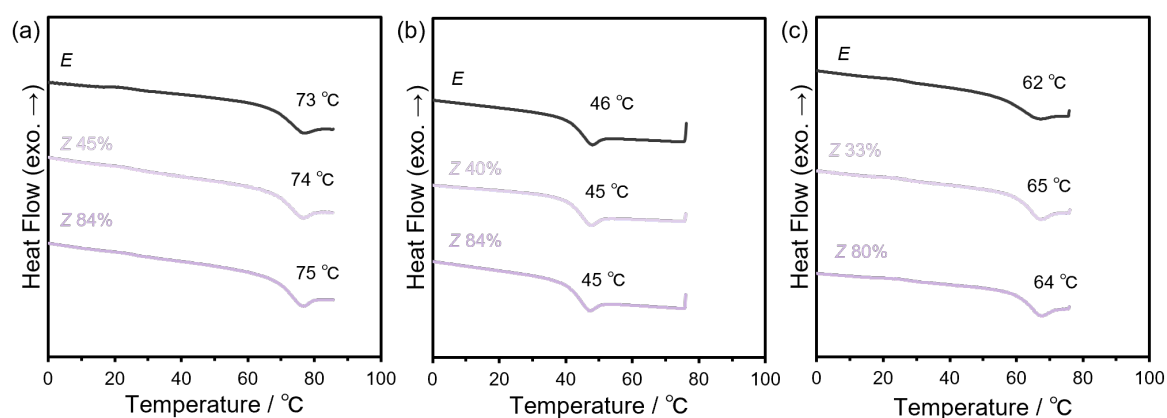

**Fig. S40** DSC curves and  $T_g$ s of (a) **P1** ( $M_n = 13200$ ), (b) **P2**, and (c) **P3** with different *E/Z* ratios.

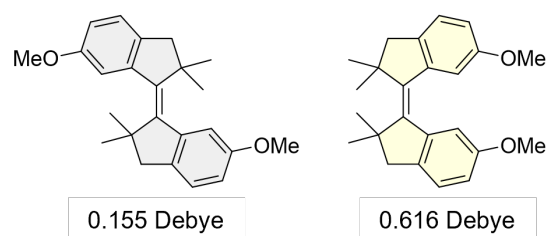

**Fig. S41** Dipole moments of *E* and *Z* isomers of HSS with two methoxy groups at 298.15 K. Dipole moments were calculated according to our previously published methods.<sup>3</sup>

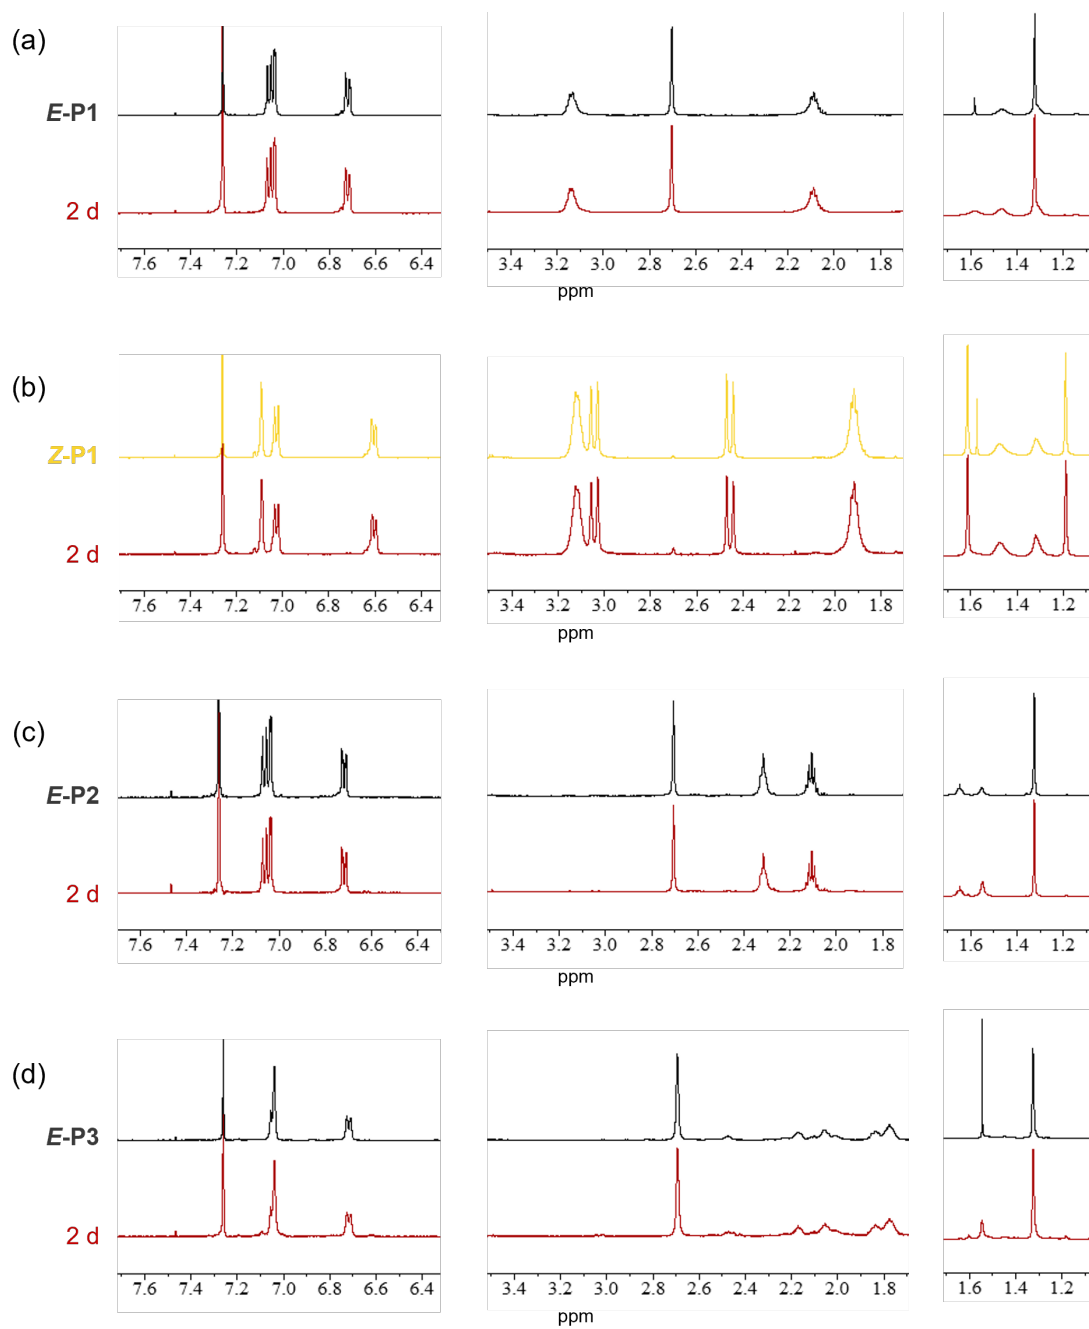

**Fig. S42**  $^1\text{H}$  NMR spectra (500 MHz,  $\text{CDCl}_3$ ) of (a) *E*-P1 ( $M_n = 13200$ ), (b) *Z*-P1, (c) *E*-P2, and (d) *E*-P3 before and after heating at  $80\text{ }^\circ\text{C}$  in vacuum for 2 days in bulk.

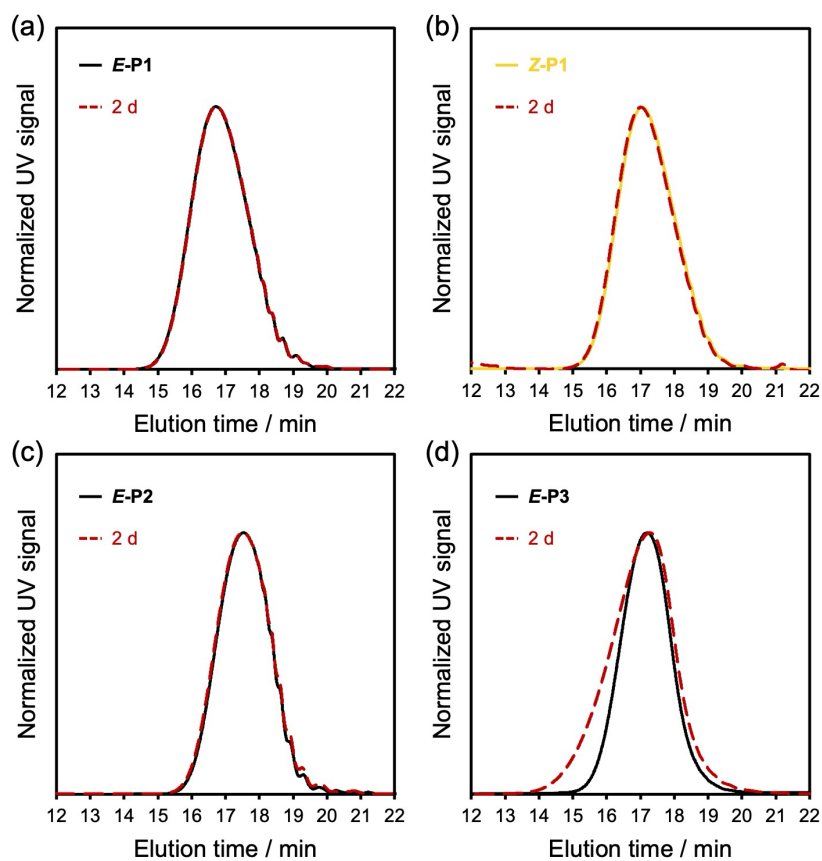

**Fig. S43** SEC curves of (a) *E-P1* ( $M_n = 13200$ ), (b) *Z-P1*, (c) *E-P2*, and (d) *E-P3* before and after heating at 80 °C in vacuum for 2 days in bulk.

**Table S3**  $M_n$ s and  $M_w/M_n$ s of *E-P1* ( $M_n = 13200$ ), *Z-P1*, *E-P2*, and *E-P3* before and after heating at 80 °C in vacuum for 2 days in bulk

|         |           | <i>E-P1</i> | <i>Z-P1</i> | <i>E-P2</i> | <i>E-P3</i> |
|---------|-----------|-------------|-------------|-------------|-------------|
| Initial | $M_n$     | 13200       | 9900        | 8000        | 11900       |
|         | $M_w/M_n$ | 1.61        | 1.59        | 1.44        | 1.36        |
| 2 d     | $M_n$     | 12900       | 10200       | 7900        | 10600       |
|         | $M_w/M_n$ | 1.62        | 1.59        | 1.48        | 2.10        |



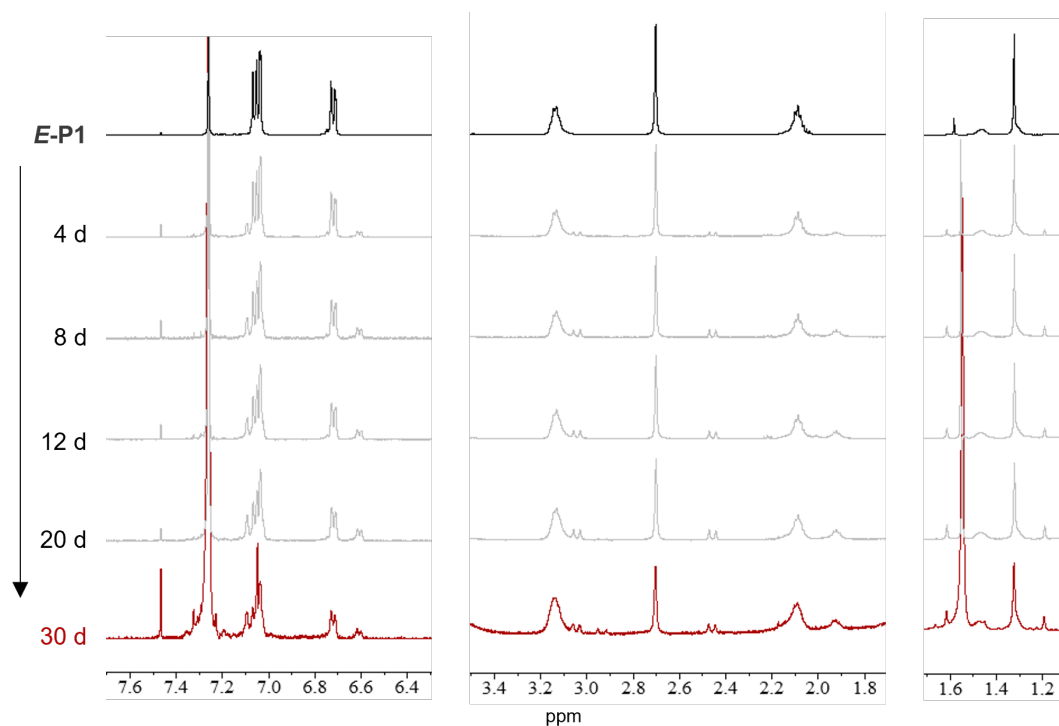

**Fig. S44** Changes in <sup>1</sup>H NMR spectra (500 MHz, CDCl<sub>3</sub>) of *E*-P1 ( $M_n = 13200$ ) upon heating at 100 °C in vacuum in bulk.

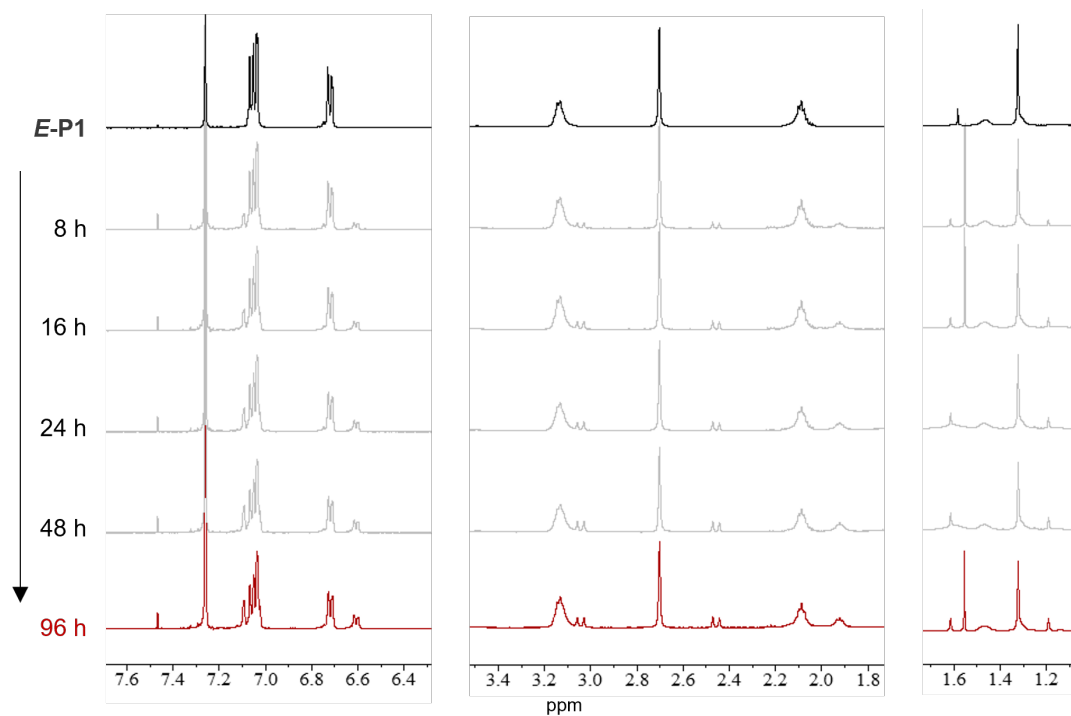

**Fig. S45** Changes in <sup>1</sup>H NMR spectra (500 MHz, CDCl<sub>3</sub>) of *E*-P1 ( $M_n = 13200$ ) upon heating at 120 °C in vacuum in bulk.

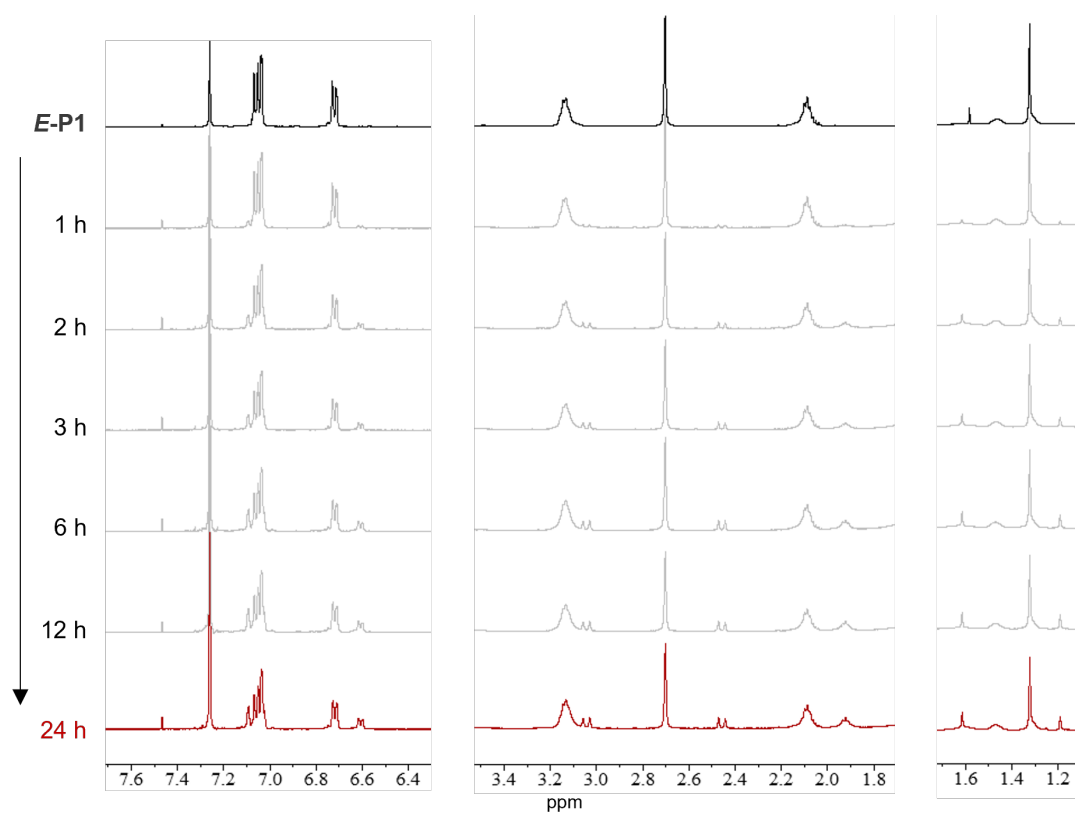

**Fig. S46** Changes in <sup>1</sup>H NMR spectra (500 MHz, CDCl<sub>3</sub>) of *E*-P1 ( $M_n = 13200$ ) upon heating at 140 °C in vacuum in bulk.

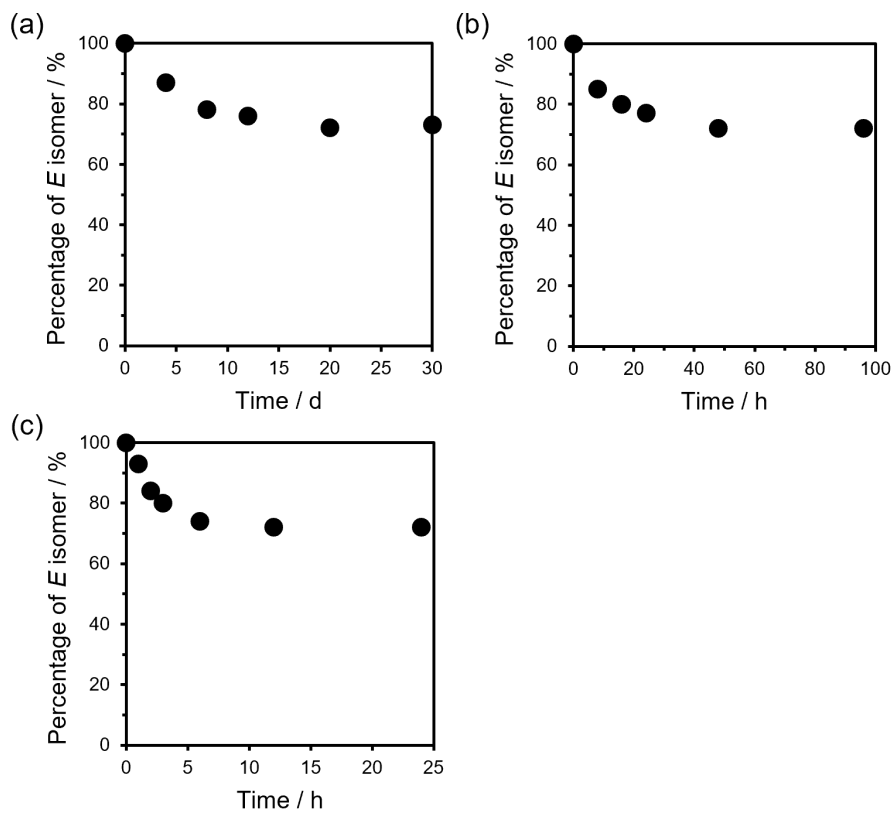

**Fig. S47** Changes in  $E/Z$  ratios of  $E$ -P1 ( $M_n = 13200$ ) upon heating at (a) 100 °C, (b) 120 °C, and (c) 140 °C in vacuum in bulk.

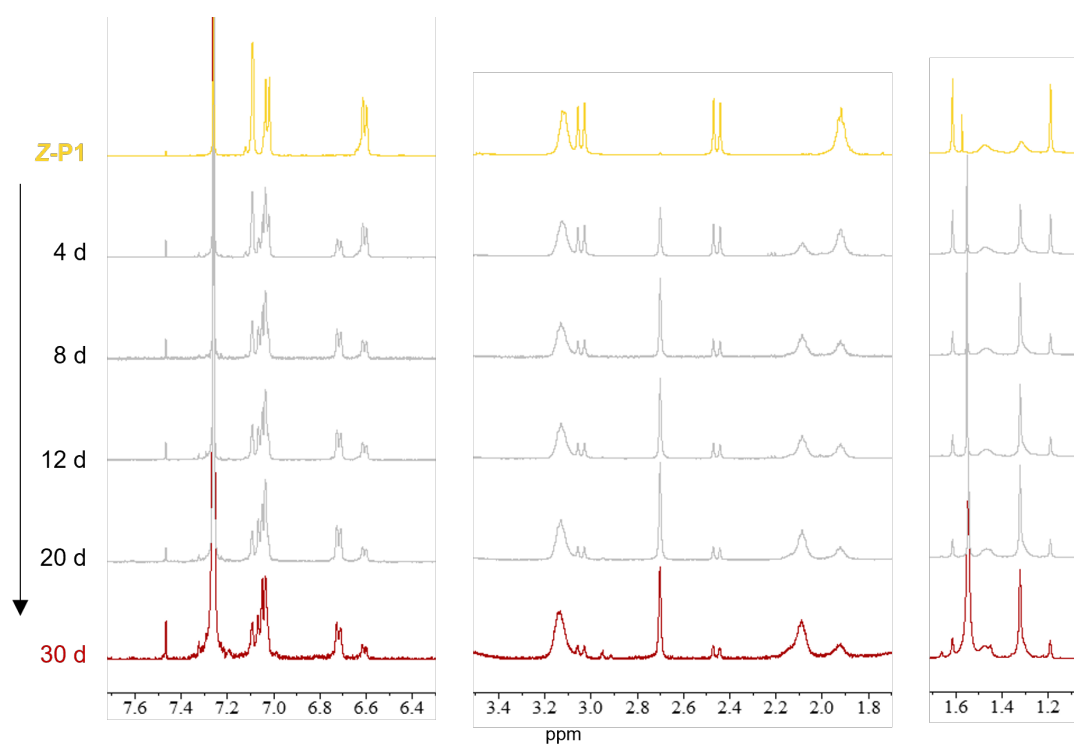

**Fig. S48** Changes in  $^1\text{H}$  NMR spectra (500 MHz,  $\text{CDCl}_3$ ) of **Z-P1** upon heating at 100 °C in vacuum in bulk.

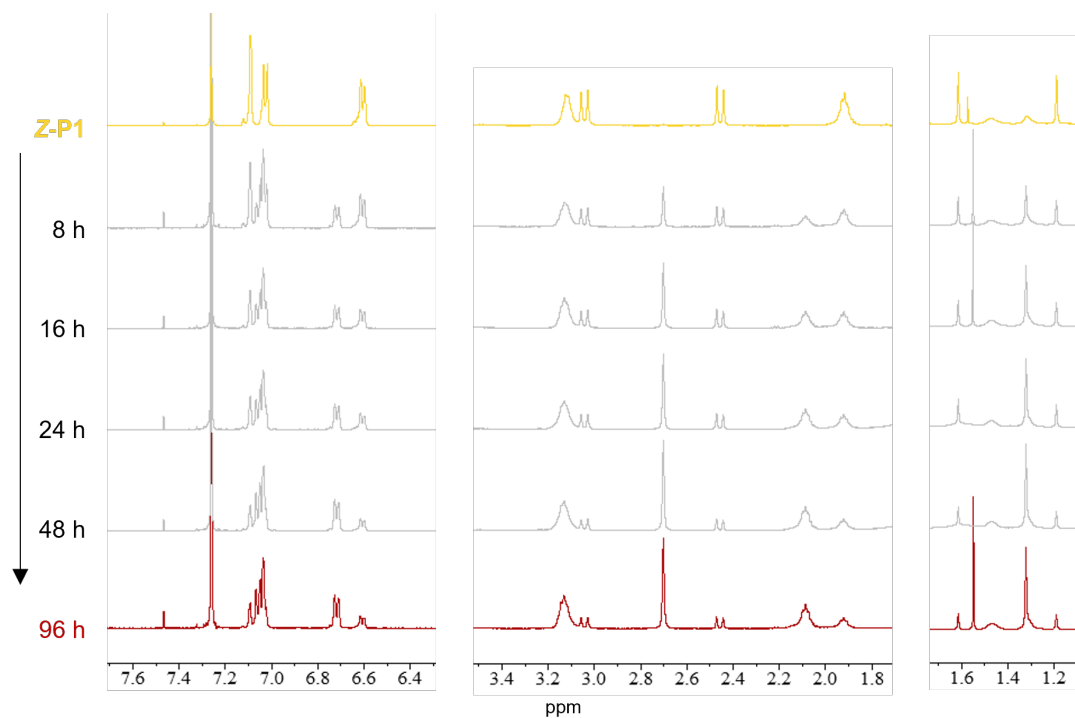

**Fig. S49** Changes in  $^1\text{H}$  NMR spectra (500 MHz,  $\text{CDCl}_3$ ) of **Z-P1** upon heating at 120 °C in vacuum in bulk.

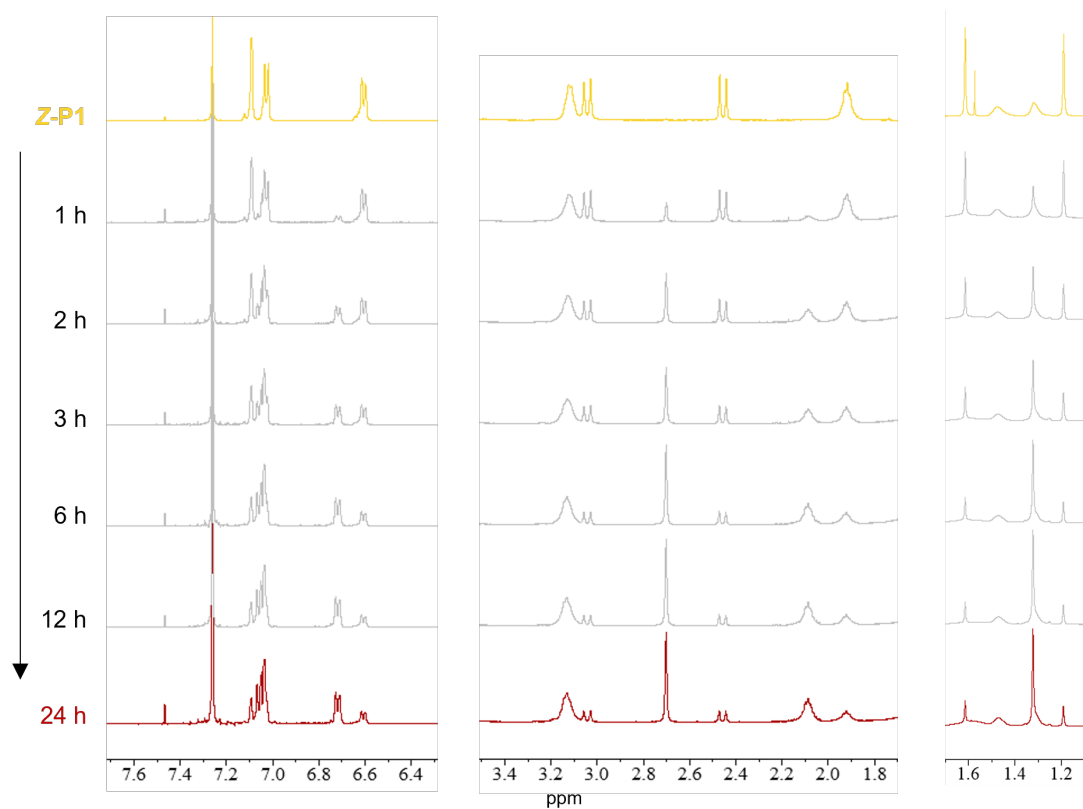

**Fig. S50** Changes in  $^1\text{H}$  NMR spectra (500 MHz,  $\text{CDCl}_3$ ) of **Z-P1** upon heating at  $140\text{ }^\circ\text{C}$  in vacuum in bulk.

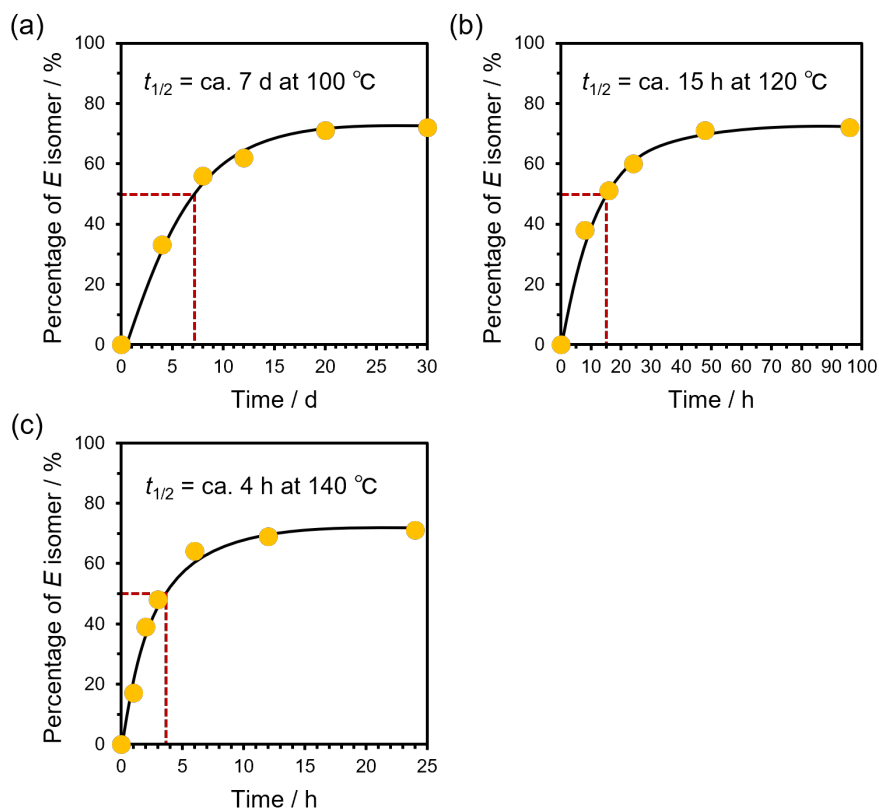

**Fig. S51** Changes in *E/Z* ratios of **Z-P1** upon heating at (a) 100 °C, (b) 120 °C, and (c) 140 °C in vacuum in bulk and half-lives ( $t_{1/2}$ s) of *Z*-to-*E* thermal isomerization.

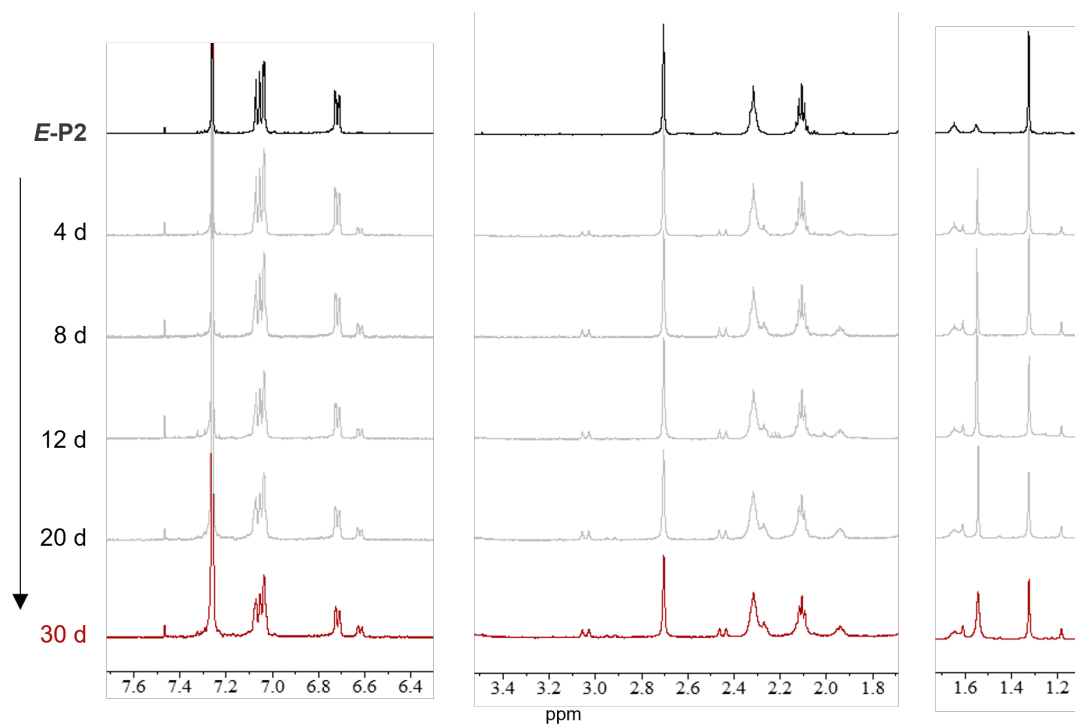

**Fig. S52** Changes in <sup>1</sup>H NMR spectra (500 MHz, CDCl<sub>3</sub>) of *E-P2* upon heating at 100 °C in vacuum in bulk.

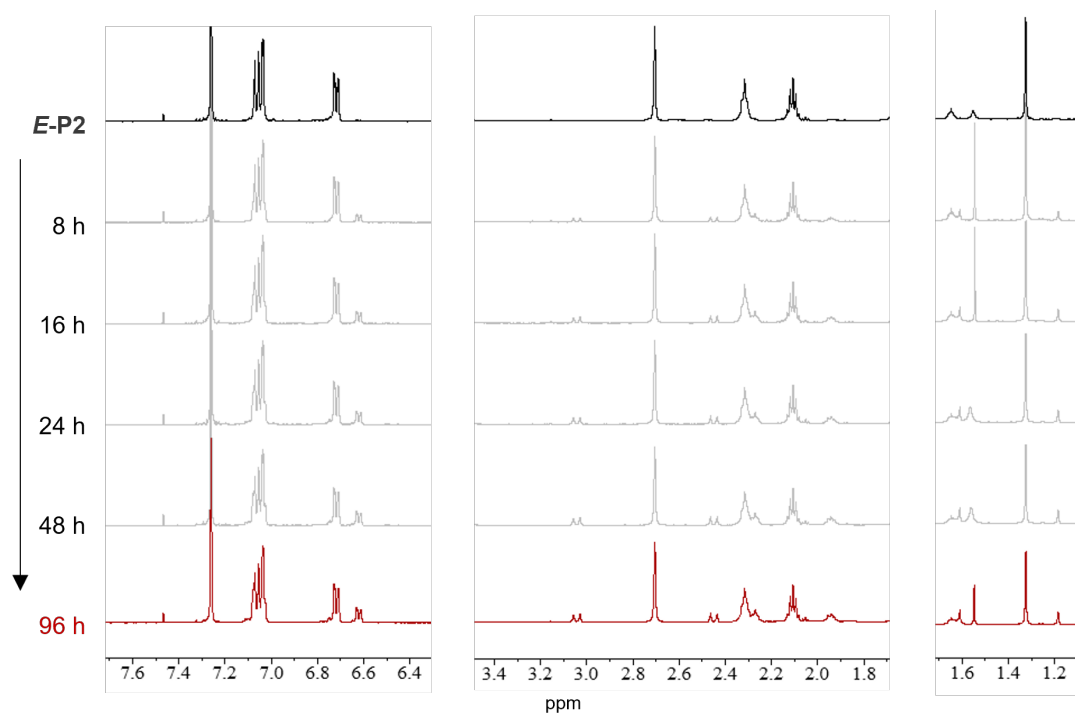

**Fig. S53** Changes in <sup>1</sup>H NMR spectra (500 MHz, CDCl<sub>3</sub>) of *E-P2* upon heating at 120 °C in vacuum in bulk.

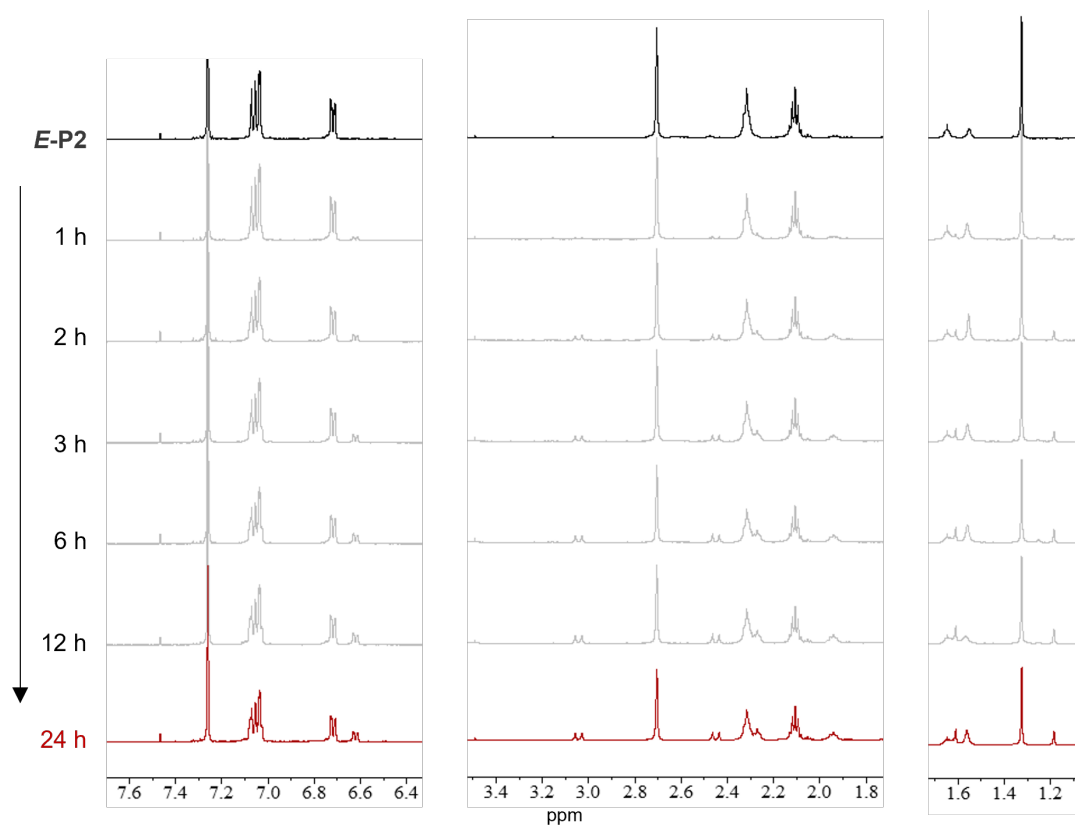

**Fig. S54** Changes in <sup>1</sup>H NMR spectra (500 MHz, CDCl<sub>3</sub>) of *E-P2* upon heating at 140 °C in vacuum in bulk.



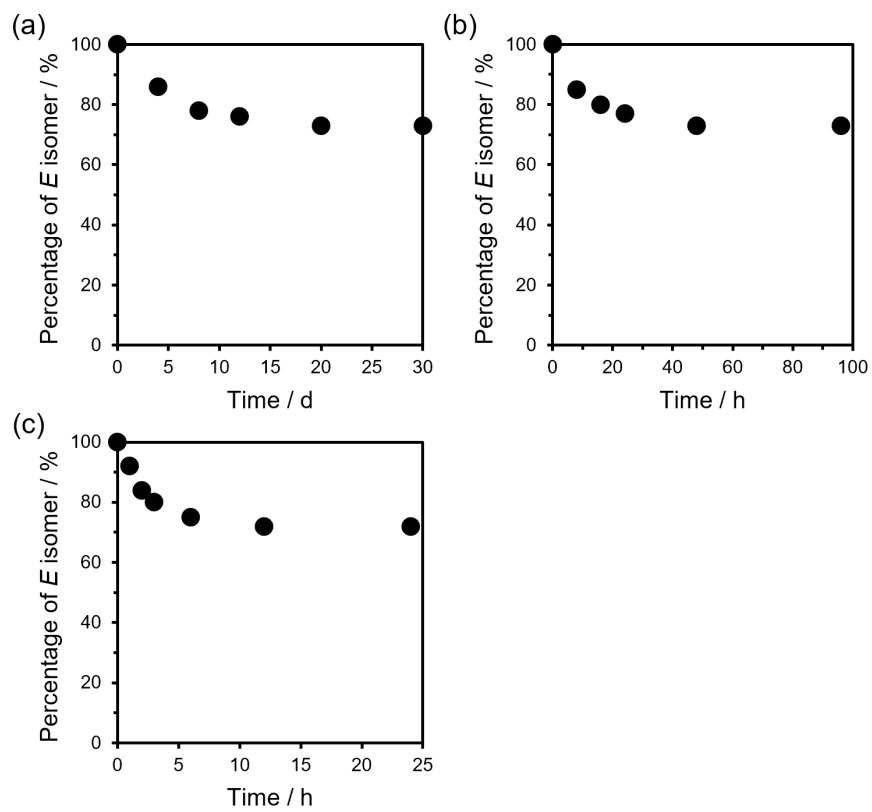

**Fig. S55** Changes in *E/Z* ratios of *E-P2* upon heating at (a) 100 °C, (b) 120 °C, and (c) 140 °C in vacuum in bulk.

## Photoisomerization in the glassy state

Polymer thin films were prepared by spin coating on hydrophobic quartz substrates. UV/vis absorption and  $^1\text{H}$  NMR spectroscopy was employed to study photoisomerization of the main-chain HSS photoswitches in the thin films.

Quartz substrates ( $20 \times 20 \times 0.8\text{--}1.0$  mm) were treated with piranha solution to clean the surfaces and expose hydroxy groups, washed with water, and dried in vacuum at RT. Then, the hydrophilic substrates were treated with 1,1,1,3,3,3-hexamethyldisilazane (HMDS) at  $140\text{ }^\circ\text{C}$  for 15 min to modify a hydrophobic monolayer, washed by sonication in acetone for 15 min, and dried in vacuum at RT. Thin films of ***E*-P1** ( $M_n = 13200$ ), ***Z*-P1**, ***E*-P2**, and ***E*-P3** were prepared by spin coating of the DCM solutions ( $160\text{ }\mu\text{L}$ , 5 or  $10\text{ mg mL}^{-1}$ ) on the HMDS-treated substrates under nitrogen atmosphere at 1000 rpm for 30 s using a Mikasa MS-A100 Opticoat spin coater and drying in vacuum at RT overnight. *Z*-rich **P2** (84% *Z*) and **P3** (80% *Z*) were obtained by exposure of ***E*-P2** and ***E*-P3** in THF ( $1.00 \times 10^{-3}$  M) to 300 nm LED light ( $0.40\text{ mW cm}^{-2}$ , LDR2-100UV300, CCS) (Fig. S29) under stirring and drying in vacuum (Fig. S38 and S39), and their thin films were also prepared in the same procedure. Prior to spin coating, the polymer solutions were stirred in the dark at RT overnight. The polymer thin films were irradiated with 300 nm LED light ( $0.40\text{ mW cm}^{-2}$ , LDR2-100UV300, CCS) and 405 nm LED light ( $19.6\text{ mW cm}^{-2}$ , LDR2-100VL405-W1U, CCS) (Fig. S29). The exposure distance was 40 mm for the 300 nm light and 80 mm for the 405 nm light. The *E/Z* ratios were determined from  $^1\text{H}$  NMR spectra.

**Table S4** Thickness of ***E*-P1** ( $M_n = 13200$ ), ***Z*-P1**, ***E*-P2**, and ***E*-P3** thin films

| Thin film          | Concentration<br>( $\text{mg mL}^{-1}$ ) | Thickness<br>( $\text{nm}$ ) <sup>a</sup> |
|--------------------|------------------------------------------|-------------------------------------------|
| <b><i>E</i>-P1</b> | 10                                       | $137 \pm 13$                              |
| <b><i>E</i>-P1</b> | 5                                        | $72 \pm 12$                               |
| <b><i>Z</i>-P1</b> | 10                                       | $134 \pm 15$                              |
| <b><i>E</i>-P2</b> | 10                                       | $176 \pm 17$                              |
| <b><i>E</i>-P3</b> | 10                                       | $180 \pm 8$                               |

<sup>a</sup>Averages and standard deviations of three measurements at different positions in thin films.

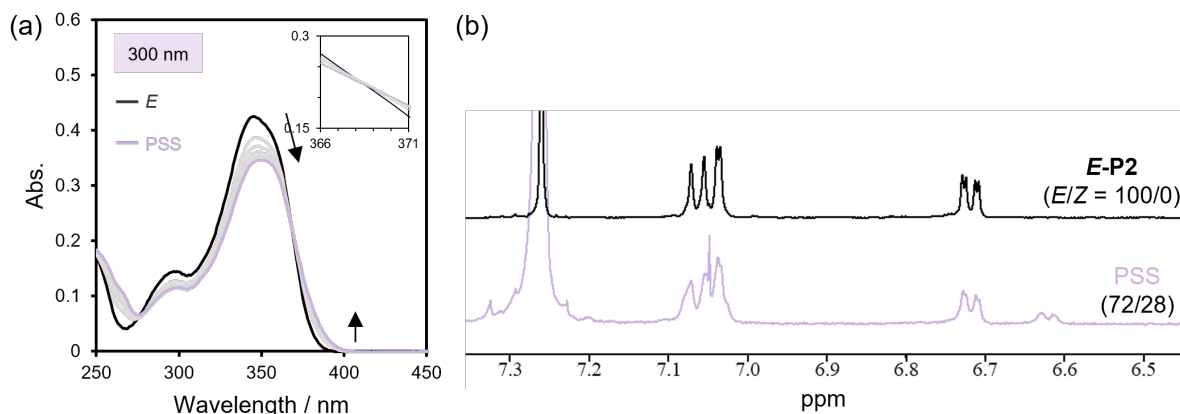

**Fig. S56** (a) UV/vis absorption spectra and (b)  $^1\text{H}$  NMR spectra (500 MHz,  $\text{CDCl}_3$ ) of *E*-P2 thin film upon irradiation with 300 nm light. The film was prepared by spin coating of the DCM solution ( $10 \text{ mg mL}^{-1}$ ).

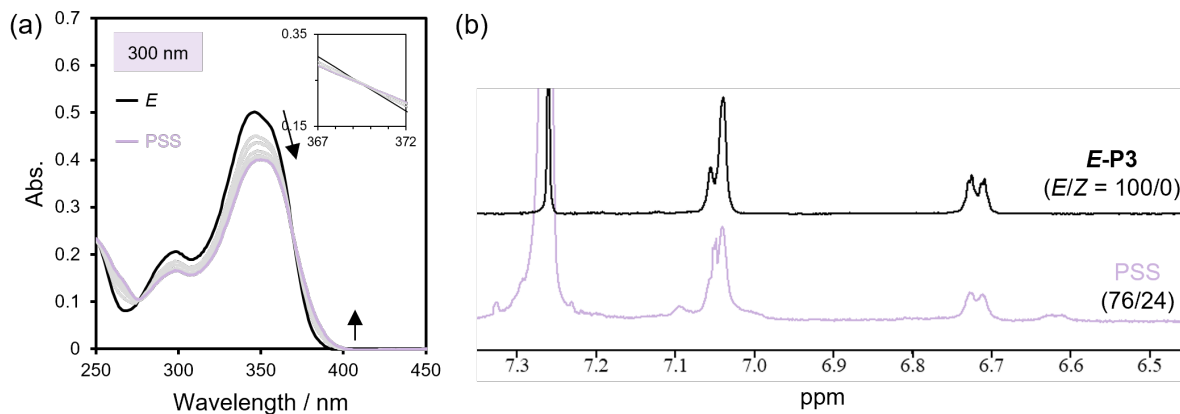

**Fig. S57** (a) UV/vis absorption spectra and (b)  $^1\text{H}$  NMR spectra (500 MHz,  $\text{CDCl}_3$ ) of *E*-P3 thin film upon irradiation with 300 nm light. The film was prepared by spin coating of the DCM solution ( $10 \text{ mg mL}^{-1}$ ).

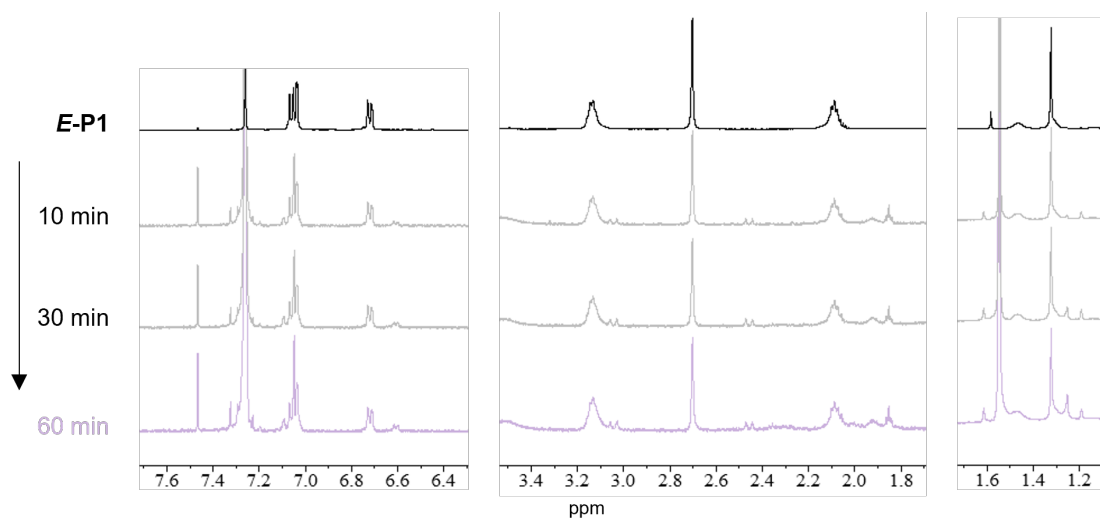

**Fig. S58** Changes in  $^1\text{H}$  NMR spectra (500 MHz,  $\text{CDCl}_3$ ) of *E-P1* ( $M_n = 13200$ ) thin film upon irradiation with 300 nm light. The film was prepared by spin coating of the DCM solution ( $10 \text{ mg mL}^{-1}$ ).

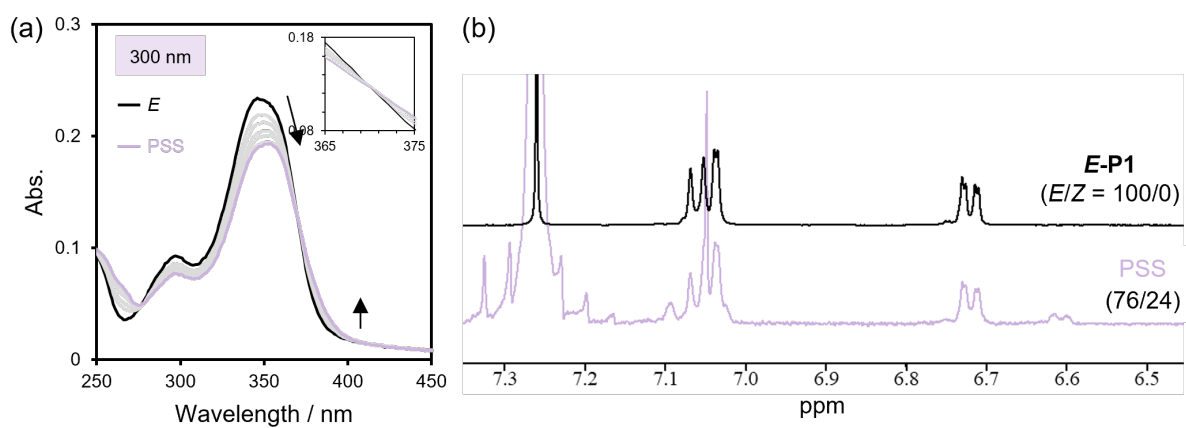

**Fig. S59** (a) UV/vis absorption spectra and (b)  $^1\text{H}$  NMR spectra (500 MHz,  $\text{CDCl}_3$ ) of *E-P1* ( $M_n = 13200$ ) thinner film upon irradiation with 300 nm light. The film was prepared by spin coating of the DCM solution ( $5 \text{ mg mL}^{-1}$ ).

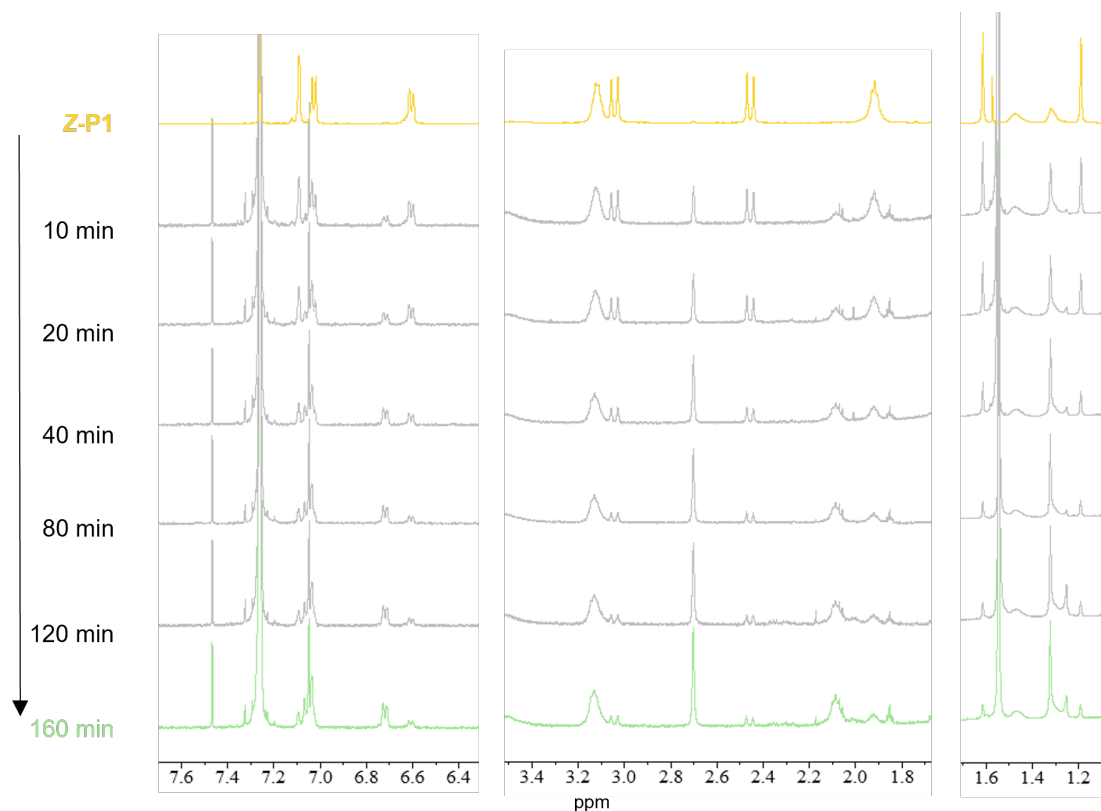

**Fig. S60** Changes in  $^1\text{H}$  NMR spectra (500 MHz,  $\text{CDCl}_3$ ) of **Z-P1** thin film upon irradiation with 405 nm light. The film was prepared by spin coating of the DCM solution ( $10 \text{ mg mL}^{-1}$ ).

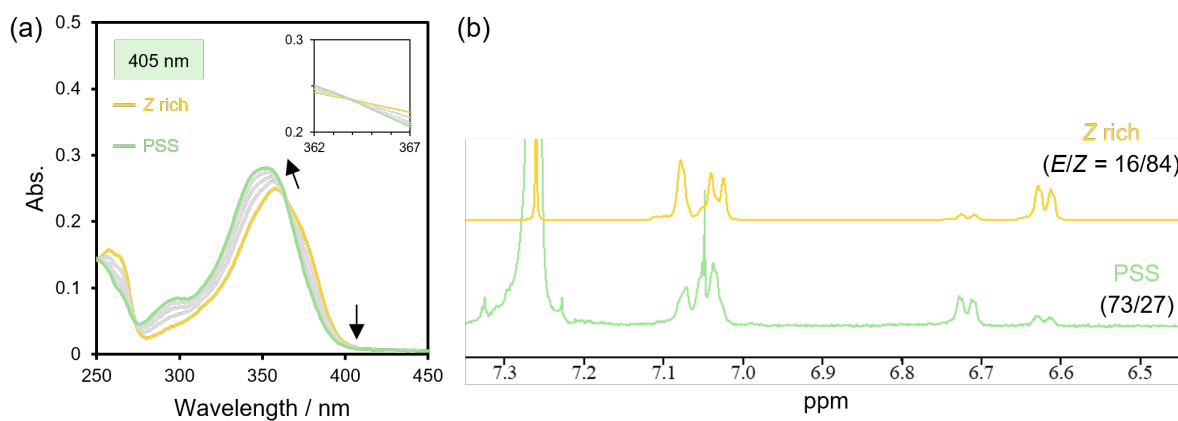

**Fig. S61** (a) UV/vis absorption spectra and (b)  $^1\text{H}$  NMR spectra (500 MHz,  $\text{CDCl}_3$ ) of Z-rich **P2** thin film upon irradiation with 405 nm light. The film was prepared by spin coating of the DCM solution ( $10 \text{ mg mL}^{-1}$ ).

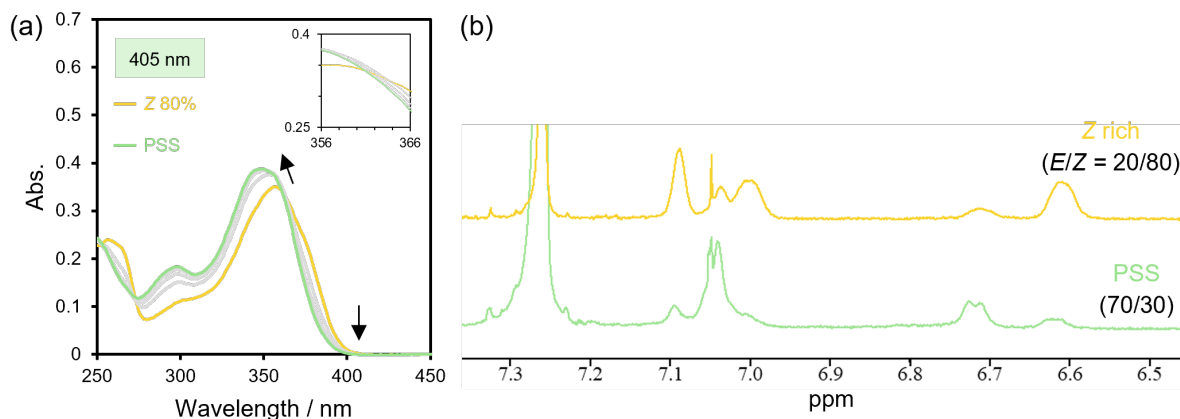

**Fig. S62** (a) UV/vis absorption spectra and (b) <sup>1</sup>H NMR spectra (500 MHz, CDCl<sub>3</sub>) of Z-rich **P3** thin film upon irradiation with 405 nm light. The film was prepared by spin coating of the DCM solution (10 mg mL<sup>-1</sup>).

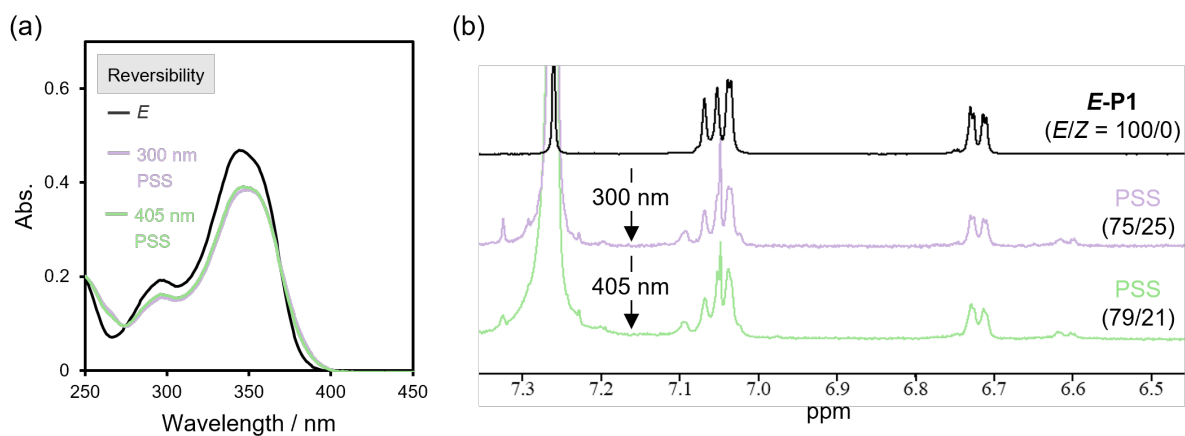

**Fig. S63** (a) UV/vis absorption spectra and (b) <sup>1</sup>H NMR spectra (500 MHz, CDCl<sub>3</sub>) of **E-P1** ( $M_n = 13200$ ) thin film upon irradiation with 300 nm light and subsequent 405 nm light. The film was prepared by spin coating of the DCM solution (10 mg mL<sup>-1</sup>).

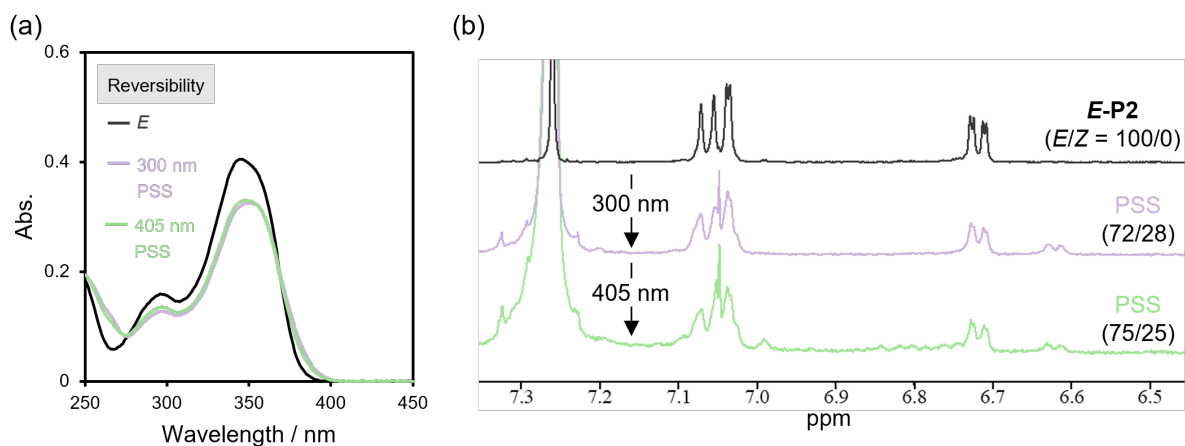

**Fig. S64** (a) UV/vis absorption spectra and (b) <sup>1</sup>H NMR spectra (500 MHz, CDCl<sub>3</sub>) of *E-P2* thin film upon irradiation with 300 nm light and subsequent 405 nm light. The film was prepared by spin coating of the DCM solution (10 mg mL<sup>-1</sup>).

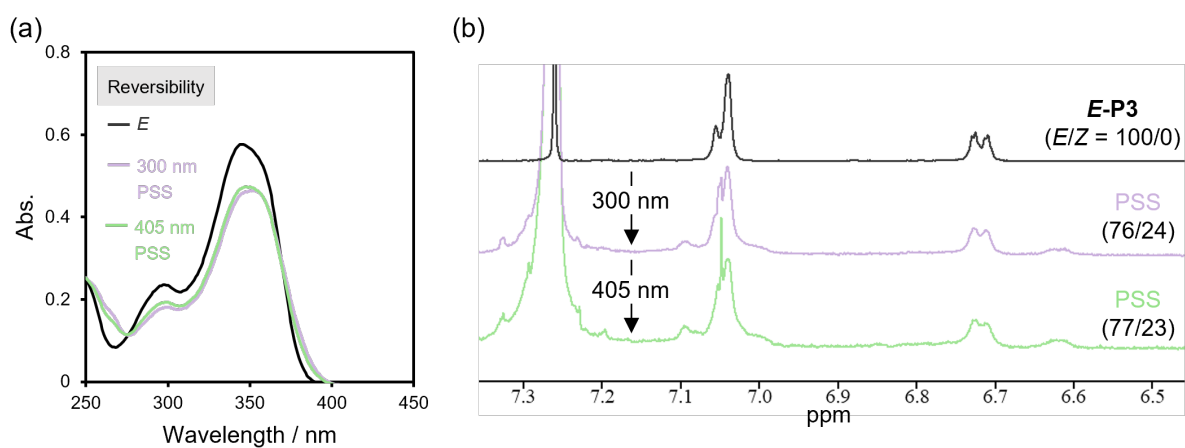

**Fig. S65** (a) UV/vis absorption spectra and (b) <sup>1</sup>H NMR spectra (500 MHz, CDCl<sub>3</sub>) of *E-P3* thin film upon irradiation with 300 nm light and subsequent 405 nm light. The film was prepared by spin coating of the DCM solution (10 mg mL<sup>-1</sup>).

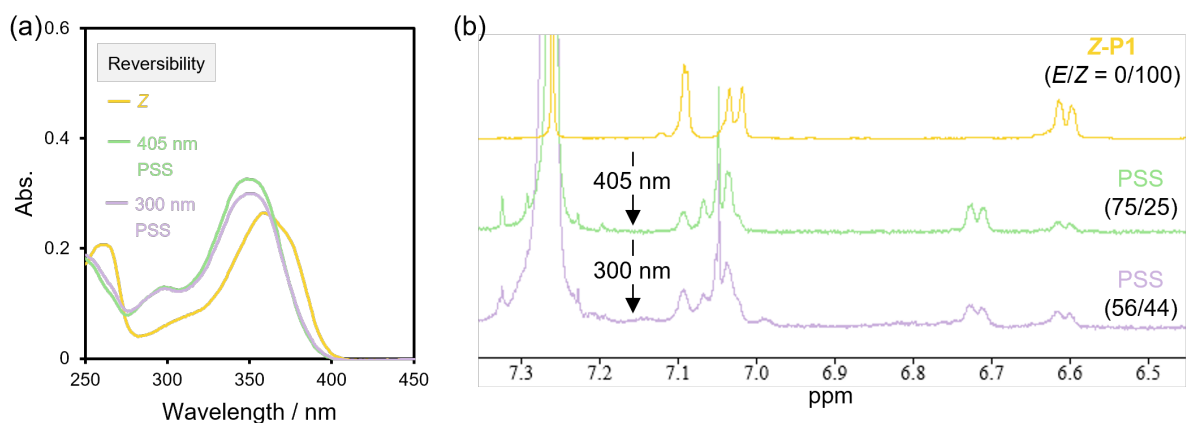

**Fig. S66** (a) UV/vis absorption spectra and (b) <sup>1</sup>H NMR spectra (500 MHz, CDCl<sub>3</sub>) of **Z-P1** thin film upon irradiation with 405 nm light and subsequent 300 nm light. The film was prepared by spin coating of the DCM solution (10 mg mL<sup>-1</sup>).

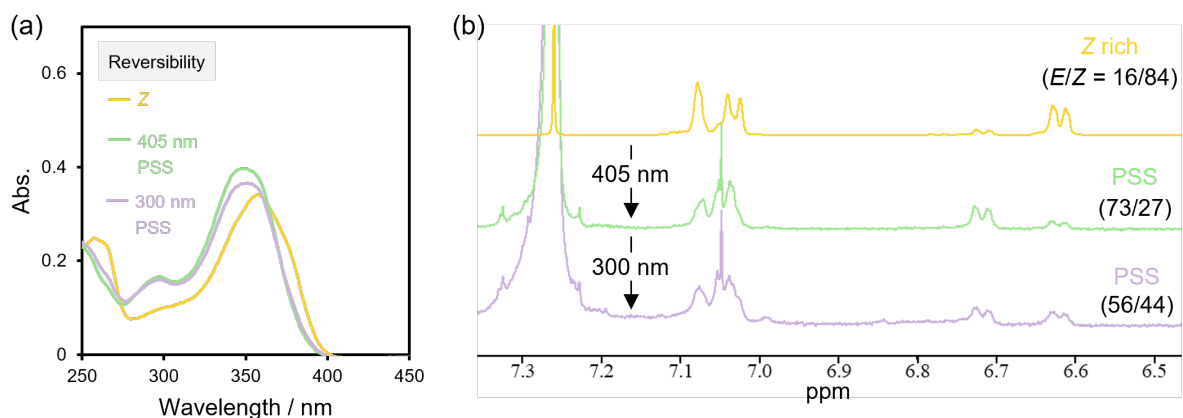

**Fig. S67** (a) UV/vis absorption spectra and (b) <sup>1</sup>H NMR spectra (500 MHz, CDCl<sub>3</sub>) of **Z-rich P2** thin film upon irradiation with 405 nm light and subsequent 300 nm light. The film was prepared by spin coating of the DCM solution (10 mg mL<sup>-1</sup>).



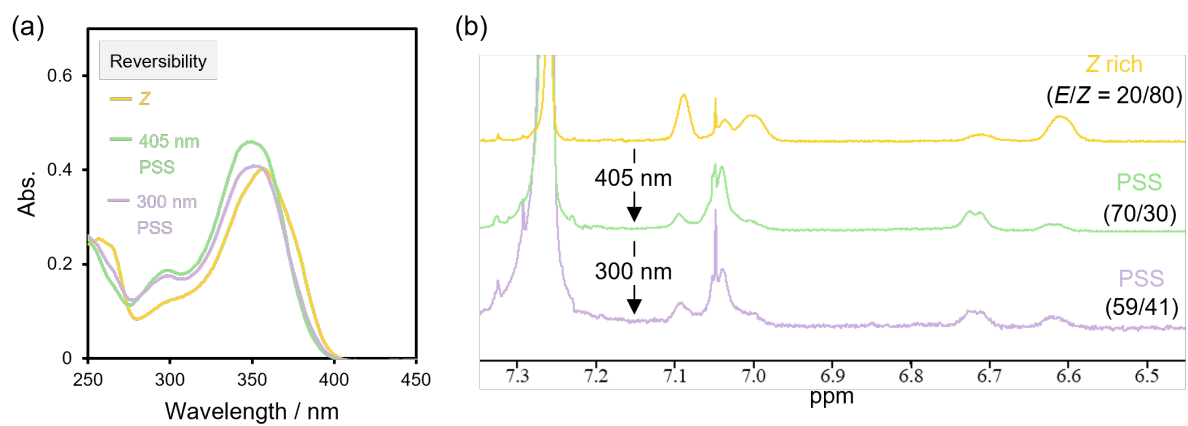

**Fig. S68** (a) UV/vis absorption spectra and (b) <sup>1</sup>H NMR spectra (500 MHz, CDCl<sub>3</sub>) of Z-rich **P3** thin film upon irradiation with 405 nm light and subsequent 300 nm light. The film was prepared by spin coating of the DCM solution (10 mg mL<sup>-1</sup>).

## Wettability of thin film surfaces

Static and dynamic contact angle measurements were employed to evaluate wettability of the polymer film surfaces. Thin films of **P1**, **P2**, and **P3** with different  $E/Z$  ratios were prepared by spin coating of the DCM solutions ( $160 \mu\text{L}$ ,  $10 \text{ mg mL}^{-1}$ ) of the polymers with different  $E/Z$  ratios on the HMDS-treated quartz substrates ( $20 \times 20 \times 0.8\text{--}1.0 \text{ mm}$ ) under nitrogen atmosphere at 1000 rpm for 30 s and drying in vacuum at RT overnight. The DCM solutions of **P1** with different  $E/Z$  ratios were obtained by exposure of **Z-P1** in THF ( $1.00 \times 10^{-3} \text{ M}$ ) to 405 nm LED light ( $19.6 \text{ mW cm}^{-2}$ , LDR2-100VL405-W1U, CCS) (Fig. S29) under stirring and drying in vacuum (Fig. S69). The DCM solutions of **P2** and **P3** with different  $E/Z$  ratios were obtained by exposure of **E-P2** and **E-P3** in THF ( $1.00 \times 10^{-3} \text{ M}$ ) to 300 nm LED light ( $0.40 \text{ mW cm}^{-2}$ , LDR2-100UV300, CCS) (Fig. S29) under stirring and drying in vacuum (Fig. S38 and S39). Thin films of **P1** with different  $E/Z$  ratios were also prepared by irradiation of the **Z-P1** thin film with 405 nm LED light ( $19.6 \text{ mW cm}^{-2}$ , LDR2-100VL405-W1U, CCS) (Fig. S29 and S72 and Table S8). Prior to spin coating, the polymer solutions were stirred in the dark at RT overnight. Static contact angles ( $\theta_{\text{SS}}$ ) were measured by gently placing a drop of water ( $2 \mu\text{L}$ ) or ethylene glycol ( $1 \mu\text{L}$ ) at four different positions on each thin film surface ( $n = 4$ ). Hysteresis of water contact angles was determined by the difference between advancing contact angles ( $\theta_{\text{AS}}$ ) and receding contact angles ( $\theta_{\text{RS}}$ ) at three different positions on each thin film surface ( $n = 3$ ). The  $\theta_{\text{AS}}$  were measured when the contact area increased by slowly injecting water from a needle into a water droplet ( $5 \mu\text{L}$ ) on the surfaces. The  $\theta_{\text{RS}}$  were measured when the contact area decreased by slowly withdrawing water from an extended droplet. Surface free energies ( $\gamma$ ) and the dispersion ( $\gamma^{\text{d}}$ ) and polar ( $\gamma^{\text{p}}$ ) components of the thin films were calculated from the  $\theta_{\text{S}}$  using eqs 1 and 2:

$$(1 + \cos \theta_{\text{S}}) \times \gamma_{\text{L}}/2 = \sqrt{\gamma^{\text{d}} \times \gamma_{\text{L}}^{\text{d}}} \times \sqrt{\gamma^{\text{p}} \times \gamma_{\text{L}}^{\text{p}}} \quad (1)$$

$$\gamma = \gamma^{\text{d}} + \gamma^{\text{p}} \quad (2)$$

where  $\gamma_{\text{L}}$  is the surface free energy of the liquid, and  $\gamma_{\text{L}}^{\text{d}}$  and  $\gamma_{\text{L}}^{\text{p}}$  are the dispersion and polar components of the liquid, respectively. The  $\gamma_{\text{L}}^{\text{d}}$  and  $\gamma_{\text{L}}^{\text{p}}$  values of water are  $21.8$  and  $51.0 \text{ mJ m}^{-2}$ , and those of ethylene glycol are  $29.3$  and  $19.0 \text{ mJ m}^{-2}$ , respectively.<sup>4</sup>

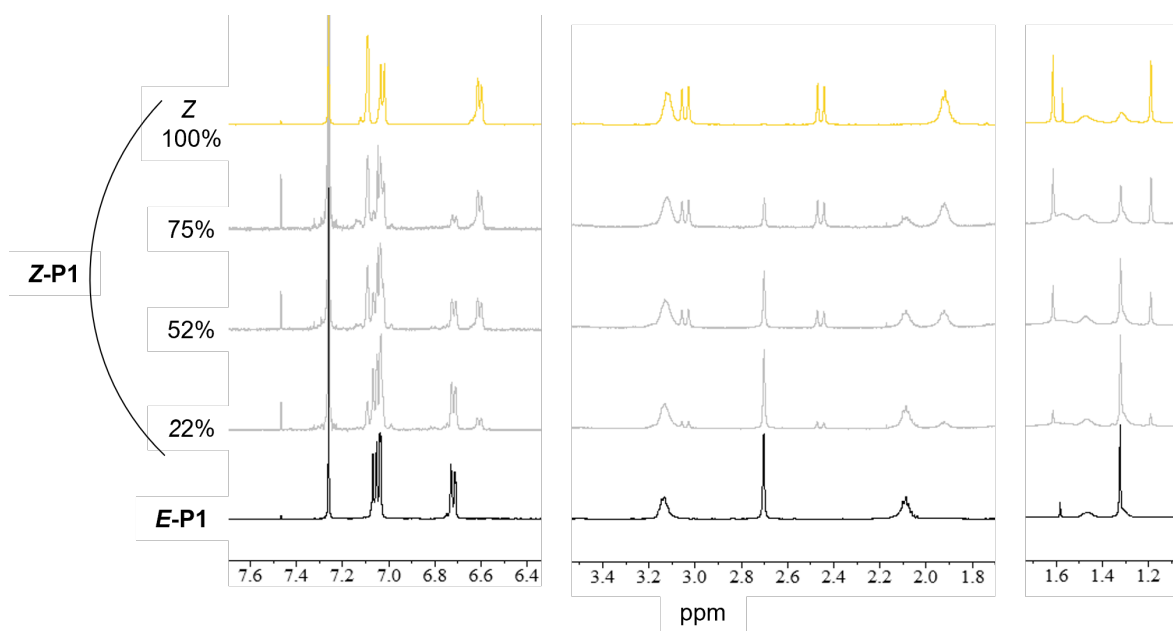

**Fig. S69**  $^1\text{H}$  NMR spectra (500 MHz,  $\text{CDCl}_3$ ) of **P1** with different  $E/Z$  ratios.

**Table S5** Root mean square (RMS) roughness ( $R_{\text{rms}}$ ) estimated from AFM images of **P1**, **P2**, and **P3** thin films with different  $E/Z$  ratios ( $1 \times 1 \mu\text{m}^2$ )

| polymer                | Z ratio (%) | $R_{\text{rms}}$ (nm) <sup>a</sup> |
|------------------------|-------------|------------------------------------|
| <b>P1</b> <sup>b</sup> | 0           | $0.32 \pm 0.07$                    |
|                        | 100         | $0.66 \pm 0.21$                    |
| <b>P2</b>              | 0           | $1.14 \pm 0.41$                    |
|                        | 84          | $0.71 \pm 0.31$                    |
| <b>P3</b>              | 0           | $0.91 \pm 0.35$                    |
|                        | 80          | $0.64 \pm 0.32$                    |

<sup>a</sup>Averages and standard deviations of four measurements at different positions on thin film surfaces.

<sup>b</sup>**E-P1** ( $M_n = 13200$ ) for 100% **E P1** and **Z-P1** for 100% **Z P1**.

**Table S6** Static contact angles ( $\theta_s$ ) of water and ethylene glycol on **P1**, **P2**, and **P3** thin films with different  $E/Z$  ratios ( $n = 4$ , mean  $\pm$  standard deviation) and surface free energies

| polymer               | Z ratio (%) | $\theta_s$     |                       | Surface free energy              |                                  |                                |
|-----------------------|-------------|----------------|-----------------------|----------------------------------|----------------------------------|--------------------------------|
|                       |             | Water (deg)    | ethylene glycol (deg) | $\gamma^d$ (mJ m <sup>-2</sup> ) | $\gamma^p$ (mJ m <sup>-2</sup> ) | $\gamma$ (mJ m <sup>-2</sup> ) |
| <b>P1<sup>a</sup></b> | 0           | 79.2 $\pm$ 0.3 | 55.2 $\pm$ 0.1        | 20.3                             | 9.6                              | 29.9                           |
|                       | 22          | 85.1 $\pm$ 0.5 | 60.5 $\pm$ 0.5        | 21.7                             | 6.2                              | 27.9                           |
|                       | 52          | 88.0 $\pm$ 0.3 | 62.5 $\pm$ 0.3        | 23.1                             | 4.6                              | 27.7                           |
|                       | 75          | 90.5 $\pm$ 0.1 | 64.3 $\pm$ 1          | 24.2                             | 3.4                              | 27.6                           |
|                       | 100         | 92.9 $\pm$ 0.3 | 65.1 $\pm$ 0.2        | 26.6                             | 2.2                              | 28.8                           |
| <b>P2</b>             | 0           | 82.9 $\pm$ 1.4 | 56.5 $\pm$ 1.2        | 23.8                             | 6.4                              | 30.3                           |
|                       | 84          | 87.5 $\pm$ 0.3 | 63.3 $\pm$ 1.1        | 21.2                             | 5.3                              | 26.6                           |
| <b>P3</b>             | 0           | 90.5 $\pm$ 0.3 | 61.9 $\pm$ 0.5        | 27.7                             | 2.6                              | 30.3                           |
|                       | 80          | 93.6 $\pm$ 0.3 | 65.5 $\pm$ 0.5        | 27.1                             | 1.9                              | 29.0                           |

<sup>a</sup>**E-P1** ( $M_n = 13200$ ) for 0% **Z-P1**. The others are prepared by photoisomerization of **Z-P1**.

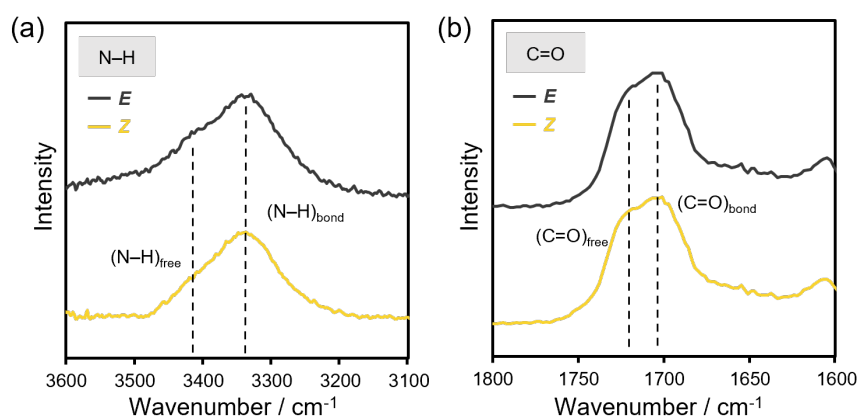

**Fig. S70** FTIR spectra of **E-P1** ( $M_n = 13200$ ) and **Z-P1** thin films focused on (a) N–H and (b) C=O stretching vibration.

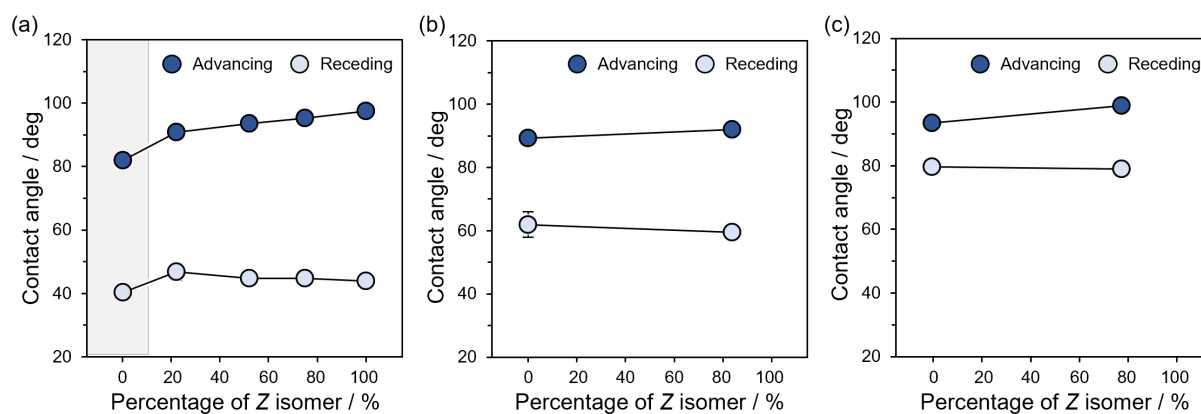

**Fig. S71** Dynamic contact angles of water on (a) **P1**, (b) **P2**, and (c) **P3** thin films with different  $E/Z$  ratios ( $n = 3$ ). Standard deviations are added as error bars but mostly buried. 0% Z **P1** highlighted in light gray is **E-P1** ( $M_n = 13200$ ). The others are prepared by photoirradiation of **Z-P1**.

**Table S7** Dynamic contact angles of water on **P1**, **P2**, and **P3** thin films with different  $E/Z$  ratios ( $n = 3$ , mean  $\pm$  standard deviation) and hysteresis

| polymer               | Z ratio (%) | Dynamic contact angle |                | Hysteresis |
|-----------------------|-------------|-----------------------|----------------|------------|
|                       |             | $\theta_A$            | $\theta_R$     |            |
| <b>P1<sup>a</sup></b> | 0           | 81.9 $\pm$ 0.9        | 40.4 $\pm$ 2.5 | 41.5       |
|                       | 22          | 90.8 $\pm$ 0.3        | 46.8 $\pm$ 2.8 | 44.0       |
|                       | 52          | 93.6 $\pm$ 1.1        | 44.8 $\pm$ 0.0 | 48.8       |
|                       | 75          | 95.2 $\pm$ 1.0        | 44.8 $\pm$ 0.0 | 50.4       |
|                       | 100         | 97.4 $\pm$ 0.3        | 43.9 $\pm$ 1.3 | 53.5       |
| <b>P2</b>             | 0           | 89.3 $\pm$ 1.3        | 61.9 $\pm$ 4.0 | 27.4       |
|                       | 84          | 92.0 $\pm$ 1.8        | 59.5 $\pm$ 2.1 | 32.5       |
| <b>P3</b>             | 0           | 93.4 $\pm$ 0.8        | 79.6 $\pm$ 2.1 | 13.8       |
|                       | 80          | 98.8 $\pm$ 1.0        | 79.0 $\pm$ 1.1 | 19.8       |

<sup>a</sup>**E-P1** ( $M_n = 13200$ ) for 0% Z **P1**. The others are prepared by photoisomerization of **Z-P1**.

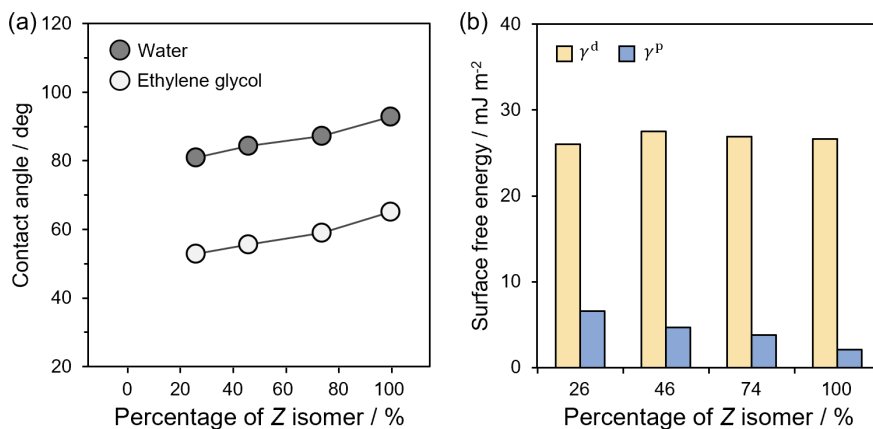

**Fig. S72** (a) Static contact angles of water and ethylene glycol on **P1** thin films with different *E/Z* ratios prepared by irradiation of **Z-P1** thin film with 405 nm light ( $n = 4$ ) and (b)  $\gamma^d$  and  $\gamma^p$  of surface free energies.

**Table S8** Static contact angles ( $\theta_s$ ) of water and ethylene glycol on **P1** thin films with different *E/Z* ratios prepared by irradiation of **Z-P1** thin film with 405 nm light ( $n = 4$ , mean  $\pm$  standard deviation) and surface free energies

| polymer   | Z ratio (%) | $\theta_s$     |                       | Surface free energy               |                                   |                                 |
|-----------|-------------|----------------|-----------------------|-----------------------------------|-----------------------------------|---------------------------------|
|           |             | Water (deg)    | ethylene glycol (deg) | $\gamma^d$ ( $\text{mJ m}^{-2}$ ) | $\gamma^p$ ( $\text{mJ m}^{-2}$ ) | $\gamma$ ( $\text{mJ m}^{-2}$ ) |
| <b>P1</b> | 26          | 81.0 $\pm$ 0.5 | 52.8 $\pm$ 0.3        | 26.0                              | 6.6                               | 32.6                            |
|           | 46          | 84.4 $\pm$ 0.3 | 55.5 $\pm$ 0.3        | 27.5                              | 4.7                               | 32.2                            |
|           | 74          | 87.2 $\pm$ 0.2 | 59.0 $\pm$ 0.6        | 26.9                              | 3.8                               | 30.7                            |
|           | 100         | 92.9 $\pm$ 0.3 | 65.1 $\pm$ 0.2        | 26.6                              | 2.2                               | 28.8                            |

## References

1. K. Imato, A. Ishii, N. Kaneda, T. Hidaka, A. Sasaki, I. Imae and Y. Ooyama, *JACS Au*, 2023, **3**, 2458–2466.
2. K. Nomura, P. Chaijaroen and M. M. Abdellatif, *ACS Omega*, 2020, **5**, 18301–18312.
3. K. Imato, A. Sasaki, A. Ishii, T. Hino, N. Kaneda, K. Ohira, I. Imae and Y. Ooyama, *J. Org. Chem.*, 2022, **87**, 15762–15770.
4. Y. Xie, J. Iwata, T. Matsumoto, N. L. Yamada, F. Nemoto, H. Seto and T. Nishino, *Langmuir*, 2022, **38**, 6472–6480.
